# Supplementary material for: Genome-Wide Characterization of WRKY Transcription Factors Revealed Gene Duplication and Diversification in Populations of Wild to Domesticated Barley
Source: MDPI journal article supplement (doi:10.3390/ijms22105354), 2021-05-19
Supplement: s1 [file s1]

## Supplementary Materials

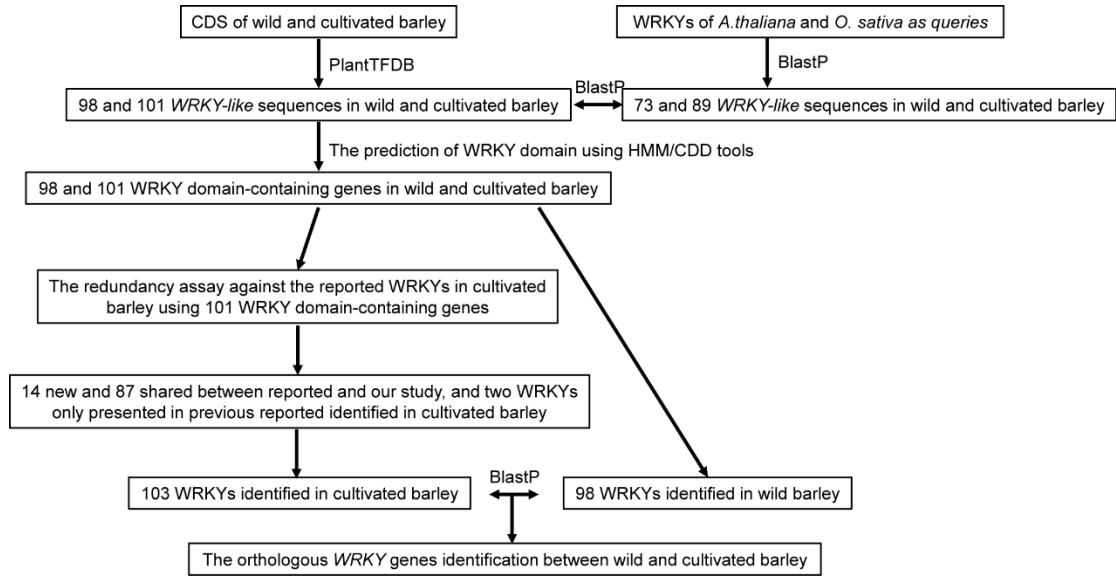

**Figure S1.** The workflow of identification of WRKYs in wild and cultivated barley.

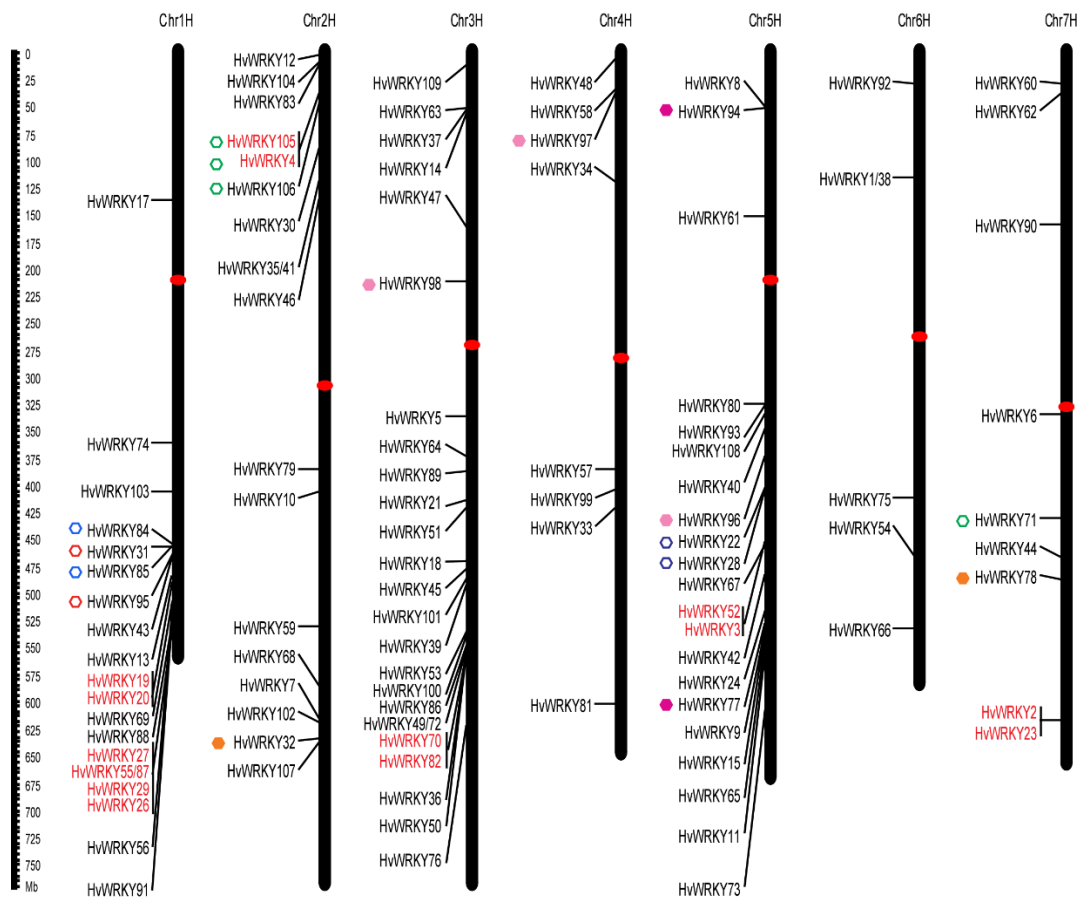

**Figure S2.** Chromosomal locations of *HvWRKY*s. The chromosomal position of each *HvWRKY* was mapped according to the barley genome Morex\_v2. The

chromosome numbers were shown at the top of each chromosome. The centromere locations were indicated by red solid ellipse, and the location of each *WRKY* gene was indicated by a line. The length refers to the size of the chromosome. Tandem duplicated genes were indicated with red fonts, and segmentally duplicated genes were shown with hexagons of different colors.

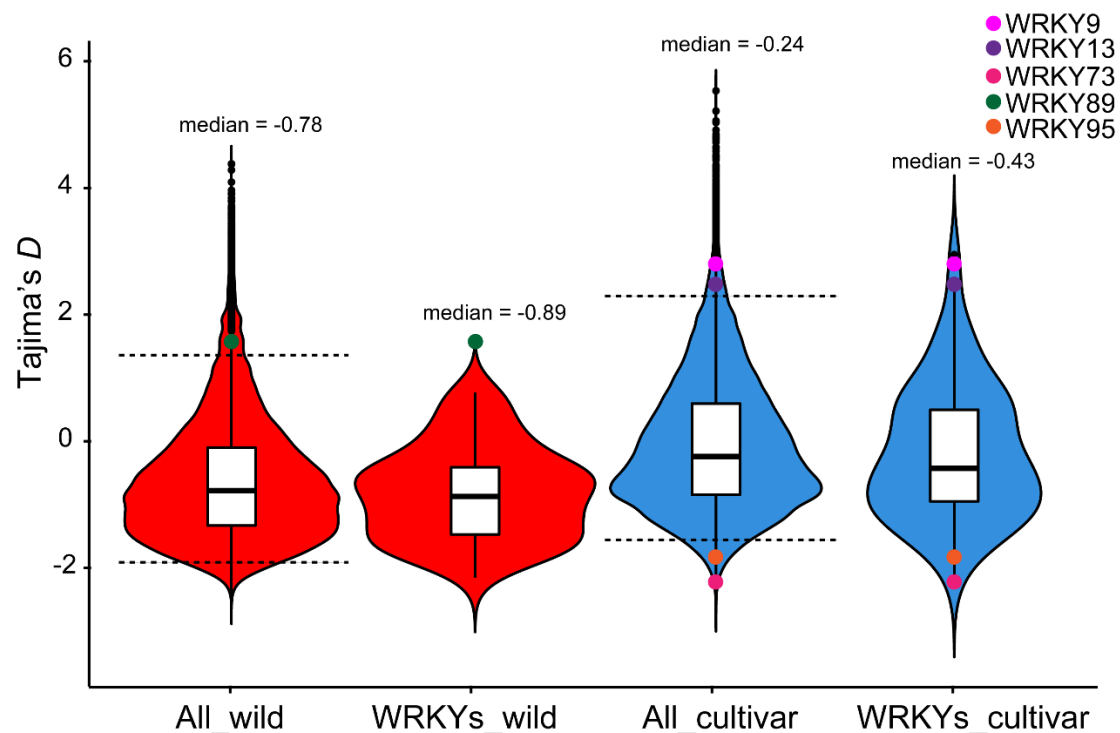

**Figure S3.** Violinplot of the Tajima's *D* of all genes and *WRKY*s in wild and cultivated barley population. Red and blue represented wild and cultivated barley, respectively. All\_wild and All\_cultivar indicated all genes from wild and cultivated barley populations, respectively, while *WRKY*s\_wild and *WRKY*s\_cultivar denoted all *WRKY*s from wild and cultivated barley populations, respectively. The dotted lines showed the 97.5% and 2.5% quantiles in each of barley compartments. *WRKY*s underwent selection were indicated with the solid colored dots.
