# Supplementary material for: Genome-Wide Characterization of WRKY Transcription Factors Revealed Gene Duplication and Diversification in Populations of Wild to Domesticated Barley
Source: MDPI journal article supplement (doi:10.3390/ijms22105354), 2021-05-19
Supplement: s1 [file s1]

**Table S6.** Sequence diversity and selection statistics of *WRKY* genes in wild and cultivated barley populations

| Genes             | Gene IDs                           | Type      | Length of fl-ORF | No. of valid sites | No. of seq. | Polymorphisms |           |          | No. of haplotypes | <i>H</i> | $\pi$   | Tajima's <i>D</i> |
|-------------------|------------------------------------|-----------|------------------|--------------------|-------------|---------------|-----------|----------|-------------------|----------|---------|-------------------|
|                   |                                    |           |                  |                    |             | <i>LoF</i>    | <i>Ns</i> | <i>S</i> |                   |          |         |                   |
| <i>HvWRKY1/38</i> | <i>HORVU.MOREX.r2.6HG0471210.1</i> | <i>Hs</i> | 1062             | 1046               | 75          | 0             | 0         | 7        | 8                 | 0.69100  | 0.00090 | -0.95917          |
|                   |                                    | <i>Hv</i> |                  |                    | 125         | 0             | 2         | 2        | 5                 | 0.31900  | 0.00032 | -0.93499          |
| <i>HvWRKY2</i>    | <i>HORVU.MOREX.r2.7HG0616250.1</i> | <i>Hs</i> | 960              | 272                | 67          | 0             | 2         | 4        | 6                 | 0.70200  | 0.00363 | -0.44061          |
|                   |                                    | <i>Hv</i> |                  |                    | 117         | 0             | 3         | 3        | 6                 | 0.68800  | 0.00377 | 0.80694           |
| <i>HvWRKY3</i>    | <i>HORVU.MOREX.r2.5HG0400750.1</i> | <i>Hs</i> | 996              | 567                | 90          | 0             | 6         | 14       | 12                | 0.81300  | 0.00311 | -1.48667          |
|                   |                                    | <i>Hv</i> |                  |                    | 134         | 0             | 6         | 9        | 7                 | 0.57500  | 0.00260 | -1.18422          |
| <i>HvWRKY4</i>    | <i>HORVU.MOREX.r2.2HG0091860.1</i> | <i>Hs</i> | 1047             | 102                | 61          | 0             | 0         | 2        | 3                 | 0.32700  | 0.00327 | -1.34627          |
|                   |                                    | <i>Hv</i> |                  |                    | 130         | 0             | 3         | 1        | 4                 | 0.17400  | 0.00220 | -1.59618          |
| <i>HvWRKY5</i>    | <i>HORVU.MOREX.r2.3HG0222170.1</i> | <i>Hs</i> | 714              | 649                | 84          | 0             | 5         | 1        | 7                 | 0.46100  | 0.00081 | -1.04538          |
|                   |                                    | <i>Hv</i> |                  |                    | 135         | 0             | 2         | 1        | 4                 | 0.64400  | 0.00135 | 1.16844           |
| <i>HvWRKY6</i>    | <i>HORVU.MOREX.r2.7HG0577260.1</i> | <i>Hs</i> | 1566             | 1373               | 90          | 0             | 5         | 4        | 8                 | 0.26600  | 0.00022 | -1.74566          |
|                   |                                    | <i>Hv</i> |                  |                    | 135         | 0             | 2         | 2        | 5                 | 0.53200  | 0.00042 | -0.23802          |
| <i>HvWRKY8</i>    | <i>HORVU.MOREX.r2.5HG0360410.1</i> | <i>Hs</i> | 1068             | 832                | 88          | 0             | 2         | 7        | 7                 | 0.35400  | 0.00061 | -1.69853          |
|                   |                                    | <i>Hv</i> |                  |                    | 136         | 0             | 1         | 0        | 2                 | 0.01500  | 0.00002 | -1.21447          |
| <i>HvWRKY9</i>    | <i>HORVU.MOREX.r2.5HG0423130.1</i> | <i>Hs</i> | 1188             | 1130               | 71          | 0             | 6         | 25       | 20                | 0.89200  | 0.00459 | -0.51639          |
|                   |                                    | <i>Hv</i> |                  |                    | 119         | 0             | 3         | 12       | 6                 | 0.66700  | 0.00444 | 2.94685*          |
| <i>HvWRKY10</i>   | <i>HORVU.MOREX.r2.2HG0130750.1</i> | <i>Hs</i> | 957              | 106                | 89          | 0             | 1         | 2        | 4                 | 0.39600  | 0.00391 | -0.03032          |
|                   |                                    | <i>Hv</i> |                  |                    | 126         | 0             | 0         | 3        | 4                 | 0.51100  | 0.00533 | -0.537679         |
| <i>HvWRKY11</i>   | <i>HORVU.MOREX.r2.5HG0432220.1</i> | <i>Hs</i> | 1359             | 766                | 67          | 0             | 11        | 10       | 17                | 0.81100  | 0.00304 | -1.08243          |
|                   |                                    | <i>Hv</i> |                  |                    | 117         | 0             | 5         | 1        | 6                 | 0.51600  | 0.00089 | -1.00012          |

| Genes            | Gene IDs                           | Type      | Length of<br>fl-ORF | No. of<br>valid<br>sites | No. of<br>seq. | Polymorphisms |           |          | No. of<br>haplotypes | <i>H</i> | $\pi$   | Tajima's <i>D</i> |
|------------------|------------------------------------|-----------|---------------------|--------------------------|----------------|---------------|-----------|----------|----------------------|----------|---------|-------------------|
|                  |                                    |           |                     |                          |                | <i>LoF</i>    | <i>Ns</i> | <i>S</i> |                      |          |         |                   |
| <i>Hv</i> WRKY12 | <i>HORVU.MOREX.r2.2HG0079820.1</i> | <i>Hs</i> | 591                 | 537                      | 54             | 0             | 6         | 19       | 26                   | 0.96400  | 0.00573 | -1.23073          |
|                  |                                    | <i>Hv</i> |                     |                          | 101            | 0             | 7         | 12       | 21                   | 0.92800  | 0.00493 | -0.84539          |
| <i>Hv</i> WRKY13 | <i>HORVU.MOREX.r2.1HG0067480.1</i> | <i>Hs</i> | 420                 | 292                      | 83             | 0             | 0         | 10       | 8                    | 0.62200  | 0.00674 | 0.14762           |
|                  |                                    | <i>Hv</i> |                     |                          | 132            | 0             | 0         | 8        | 5                    | 0.74100  | 0.00921 | 2.39787*          |
| <i>Hv</i> WRKY15 | <i>HORVU.MOREX.r2.5HG0425110.1</i> | <i>Hs</i> | 930                 | 554                      | 89             | 0             | 7         | 8        | 14                   | 0.77800  | 0.00234 | -1.54089          |
|                  |                                    | <i>Hv</i> |                     |                          | 135            | 0             | 3         | 5        | 6                    | 0.54000  | 0.00213 | -0.64344          |
| <i>Hv</i> WRKY17 | <i>HORVU.MOREX.r2.1HG0023190.1</i> | <i>Hs</i> | 600                 | 521                      | 88             | 0             | 3         | 2        | 7                    | 0.25300  | 0.00051 | -1.58417          |
|                  |                                    | <i>Hv</i> |                     |                          | 132            | 0             | 1         | 1        | 3                    | 0.46600  | 0.00095 | 0.67992           |
| <i>Hv</i> WRKY18 | <i>HORVU.MOREX.r2.3HG0236250.1</i> | <i>Hs</i> | 633                 | 307                      | 83             | 0             | 5         | 6        | 8                    | 0.30400  | 0.00152 | -0.63467          |
|                  |                                    | <i>Hv</i> |                     |                          | 136            | 0             | 3         | 2        | 5                    | 0.25200  | 0.00144 | -0.53028          |
| <i>Hv</i> WRKY19 | <i>HORVU.MOREX.r2.1HG0066230.1</i> | <i>Hs</i> | 657                 | 191                      | 89             | 0             | 1         | 9        | 11                   | 0.63000  | 0.00421 | -0.56455          |
|                  |                                    | <i>Hv</i> |                     |                          | 136            | 0             | 1         | 1        | 3                    | 0.31900  | 0.00249 | 0.16758           |
| <i>Hv</i> WRKY20 | <i>HORVU.MOREX.r2.1HG0066270.1</i> | <i>Hs</i> | 651                 | 578                      | 80             | 0             | 6         | 10       | 13                   | 0.61500  | 0.00311 | -1.07527          |
|                  |                                    | <i>Hv</i> |                     |                          | 132            | 0             | 4         | 2        | 3                    | 0.19600  | 0.00123 | -0.90743          |
| <i>Hv</i> WRKY22 | <i>HORVU.MOREX.r2.5HG0392720.1</i> | <i>Hs</i> | 999                 | 729                      | 69             | 0             | 12        | 7        | 14                   | 0.83300  | 0.00245 | -1.62753          |
|                  |                                    | <i>Hv</i> |                     |                          | 112            | 0             | 2         | 3        | 5                    | 0.68300  | 0.00217 | 0.79454           |
| <i>Hv</i> WRKY23 | <i>HORVU.MOREX.r2.7HG0616260.1</i> | <i>Hs</i> | 1179                | 235                      | 86             | 0             | 3         | 7        | 11                   | 0.56500  | 0.00415 | -1.49465          |
|                  |                                    | <i>Hv</i> |                     |                          | 131            | 0             | 1         | 6        | 5                    | 0.56300  | 0.00530 | -0.43439          |
| <i>Hv</i> WRKY26 | <i>HORVU.MOREX.r2.1HG0074460.1</i> | <i>Hs</i> | 765                 | 445                      | 46             | 0             | 2         | 3        | 6                    | 0.52100  | 0.00133 | -0.72485          |
|                  |                                    | <i>Hv</i> |                     |                          | 101            | 0             | 0         | 0        | 1                    | 0        | 0       | -1.17355          |
| <i>Hv</i> WRKY28 | <i>HORVU.MOREX.r2.5HG0392730.1</i> | <i>Hs</i> | 1041                | 869                      | 44             | 0             | 6         | 4        | 9                    | 0.52700  | 0.00095 | -1.78499          |
|                  |                                    | <i>Hv</i> |                     |                          | 89             | 0             | 3         | 3        | 6                    | 0.65700  | 0.00101 | -0.20339          |

| Genes               | Gene IDs                           | Type      | Length of<br>fl-ORF | No. of<br>valid<br>sites | No. of<br>seq. | Polymorphisms |                      |          | No. of<br>haplotypes | <i>H</i> | $\pi$   | Tajima's <i>D</i> |
|---------------------|------------------------------------|-----------|---------------------|--------------------------|----------------|---------------|----------------------|----------|----------------------|----------|---------|-------------------|
|                     |                                    |           |                     |                          |                | <i>LoF</i>    | <i>N<sub>s</sub></i> | <i>S</i> |                      |          |         |                   |
| <i>Hv</i> WRKY31    | <i>HORVU.MOREX.r2.1HG0057170.1</i> | <i>Hs</i> | 930                 | 877                      | 73             | 0             | 19                   | 16       | 18                   | 0.89000  | 0.00600 | -0.52370          |
|                     |                                    | <i>Hv</i> |                     |                          | 136            | 0             | 3                    | 3        | 6                    | 0.12800  | 0.00042 | -1.35959          |
| <i>Hv</i> WRKY32    | <i>HORVU.MOREX.r2.2HG0166600.1</i> | <i>Hs</i> | 879                 | 150                      | 90             | 0             | 1                    | 4        | 9                    | 0.74600  | 0.00708 | 0.48328           |
|                     |                                    | <i>Hv</i> |                     |                          | 137            | 0             | 1                    | 2        | 4                    | 0.64000  | 0.00670 | 1.66345           |
| <i>Hv</i> WRKY33    | <i>HORVU.MOREX.r2.4HG0316370.1</i> | <i>Hs</i> | 621                 | 49                       | 90             | 0             | 1                    | 2        | 4                    | 0.35900  | 0.00751 | -0.56955          |
|                     |                                    | <i>Hv</i> |                     |                          | 137            | 0             | 1                    | 0        | 2                    | 0.01500  | 0.00030 | -0.91966          |
| <i>Hv</i> WRKY34    | <i>HORVU.MOREX.r2.4HG0294290.1</i> | <i>Hs</i> | 672                 | 570                      | 89             | 0             | 6                    | 7        | 12                   | 0.65000  | 0.00232 | -1.08278          |
|                     |                                    | <i>Hv</i> |                     |                          | 137            | 0             | 2                    | 1        | 2                    | 0.07100  | 0.00037 | -0.94982          |
| <i>Hv</i> WRKY35/41 | <i>HORVU.MOREX.r2.2HG0106180.1</i> | <i>Hs</i> | 1278                | 874                      | 90             | 0             | 4                    | 9        | 11                   | 0.79200  | 0.00321 | 0.53148           |
|                     |                                    | <i>Hv</i> |                     |                          | 136            | 0             | 3                    | 3        | 7                    | 0.42700  | 0.00065 | -0.84340          |
| <i>Hv</i> WRKY37    | <i>HORVU.MOREX.r2.3HG0197030.1</i> | <i>Hs</i> | 1485                | 201                      | 90             | 0             | 4                    | 3        | 8                    | 0.26700  | 0.00141 | -0.90985          |
|                     |                                    | <i>Hv</i> |                     |                          | 137            | 0             | 0                    | 0        | 1                    | 0        | 0       | -0.16439          |
| <i>Hv</i> WRKY39    | <i>HORVU.MOREX.r2.3HG0239890.1</i> | <i>Hs</i> | 846                 | 328                      | 55             | 0             | 0                    | 2        | 3                    | 0.07200  | 0.00022 | -0.65114          |
|                     |                                    | <i>Hv</i> |                     |                          | 101            | 0             | 0                    | 1        | 2                    | 0.02000  | 0.00006 | -0.90236          |
| <i>Hv</i> WRKY40    | <i>HORVU.MOREX.r2.5HG0386470.1</i> | <i>Hs</i> | 1005                | 233                      | 90             | 0             | 3                    | 1        | 5                    | 0.56600  | 0.00269 | -0.18658          |
|                     |                                    | <i>Hv</i> |                     |                          | 136            | 0             | 2                    | 0        | 3                    | 0.02900  | 0.00013 | -1.21447          |
| <i>Hv</i> WRKY42    | <i>HORVU.MOREX.r2.5HG0405940.1</i> | <i>Hs</i> | 2031                | 1918                     | 82             | 0             | 11                   | 24       | 28                   | 0.93400  | 0.00171 | -1.64952          |
|                     |                                    | <i>Hv</i> |                     |                          | 128            | 0             | 6                    | 10       | 13                   | 0.71500  | 0.00059 | -1.61485          |
| <i>Hv</i> WRKY43    | <i>HORVU.MOREX.r2.1HG0057680.1</i> | <i>Hs</i> | 1539                | 302                      | 85             | 0             | 5                    | 6        | 12                   | 0.76900  | 0.00378 | -1.19480          |
|                     |                                    | <i>Hv</i> |                     |                          | 130            | 0             | 1                    | 4        | 6                    | 0.34000  | 0.00119 | -0.50474          |
| <i>Hv</i> WRKY45    | <i>HORVU.MOREX.r2.3HG0237940.1</i> | <i>Hs</i> | 894                 | 237                      | 62             | 0             | 3                    | 5        | 8                    | 0.80900  | 0.00901 | 0.63440           |
|                     |                                    | <i>Hv</i> |                     |                          | 115            | 0             | 2                    | 4        | 5                    | 0.46200  | 0.00448 | -0.25603          |

| Genes               | Gene IDs                           | Type      | Length of<br>fl-ORF | No. of<br>valid<br>sites | No. of<br>seq. | Polymorphisms |           |          | No. of<br>haplotypes | <i>H</i> | $\pi$   | Tajima's <i>D</i> |
|---------------------|------------------------------------|-----------|---------------------|--------------------------|----------------|---------------|-----------|----------|----------------------|----------|---------|-------------------|
|                     |                                    |           |                     |                          |                | <i>LoF</i>    | <i>Ns</i> | <i>S</i> |                      |          |         |                   |
| <i>Hv</i> WRKY46    | <i>HORVU.MOREX.r2.2HG0107970.1</i> | <i>Hs</i> | 1848                | 1463                     | 90             | 0             | 3         | 7        | 10                   | 0.60200  | 0.00055 | -1.30393          |
|                     |                                    | <i>Hv</i> |                     |                          | 137            | 0             | 2         | 5        | 7                    | 0.32400  | 0.00035 | -1.16404          |
| <i>Hv</i> WRKY47    | <i>HORVU.MOREX.r2.3HG0209060.1</i> | <i>Hs</i> | 1710                | 1547                     | 58             | 0             | 3         | 5        | 9                    | 0.55200  | 0.00042 | -1.82310          |
|                     |                                    | <i>Hv</i> |                     |                          | 104            | 0             | 3         | 5        | 9                    | 0.55200  | 0.00049 | -0.92263          |
| <i>Hv</i> WRKY50    | <i>HORVU.MOREX.r2.3HG0254080.1</i> | <i>Hs</i> | 1677                | 627                      | 70             | 0             | 2         | 15       | 19                   | 0.84100  | 0.00260 | -1.22615          |
|                     |                                    | <i>Hv</i> |                     |                          | 129            | 0             | 1         | 4        | 5                    | 0.43200  | 0.00084 | 0.37584           |
| <i>Hv</i> WRKY51    | <i>HORVU.MOREX.r2.3HG0230420.1</i> | <i>Hs</i> | 1095                | 554                      | 90             | 0             | 0         | 1        | 2                    | 0.02200  | 0.00004 | 0.63797           |
|                     |                                    | <i>Hv</i> |                     |                          | 137            | 0             | 0         | 0        | 1                    | 0        | 0       | 1.53987           |
| <i>Hv</i> WRKY52    | <i>HORVU.MOREX.r2.5HG0400740.1</i> | <i>Hs</i> | 996                 | 595                      | 82             | 0             | 10        | 10       | 17                   | 0.86000  | 0.00404 | -0.81277          |
|                     |                                    | <i>Hv</i> |                     |                          | 132            | 0             | 6         | 7        | 11                   | 0.76100  | 0.00418 | -0.03733          |
| <i>Hv</i> WRKY55/87 | <i>HORVU.MOREX.r2.1HG0074420.1</i> | <i>Hs</i> | 1044                | 337                      | 74             | 0             | 9         | 6        | 14                   | 0.78700  | 0.00576 | -1.64938          |
|                     |                                    | <i>Hv</i> |                     |                          | 120            | 0             | 2         | 0        | 3                    | 0.03300  | 0.00010 | -1.30200          |
| <i>Hv</i> WRKY56    | <i>HORVU.MOREX.r2.1HG0076100.1</i> | <i>Hs</i> | 930                 | 187                      | 90             | 0             | 4         | 9        | 13                   | 0.64600  | 0.00903 | -0.61533          |
|                     |                                    | <i>Hv</i> |                     |                          | 137            | 0             | 2         | 7        | 7                    | 0.49100  | 0.00779 | 0.29297           |
| <i>Hv</i> WRKY57    | <i>HORVU.MOREX.r2.4HG0313700.1</i> | <i>Hs</i> | 1119                | 844                      | 90             | 0             | 7         | 3        | 9                    | 0.64800  | 0.00113 | -1.14242          |
|                     |                                    | <i>Hv</i> |                     |                          | 137            | 0             | 2         | 1        | 3                    | 0.02900  | 0.00004 | -1.34929          |
| <i>Hv</i> WRKY58    | <i>HORVU.MOREX.r2.4HG0284540.1</i> | <i>Hs</i> | 1023                | 881                      | 90             | 0             | 8         | 21       | 25                   | 0.92700  | 0.00460 | -0.60447          |
|                     |                                    | <i>Hv</i> |                     |                          | 137            | 0             | 6         | 10       | 12                   | 0.83600  | 0.00539 | 1.76245           |
| <i>Hv</i> WRKY59    | <i>HORVU.MOREX.r2.2HG0144420.1</i> | <i>Hs</i> | 2211                | 843                      | 61             | 0             | 6         | 14       | 15                   | 0.80800  | 0.00535 | -0.21297          |
|                     |                                    | <i>Hv</i> |                     |                          | 103            | 0             | 2         | 8        | 7                    | 0.34400  | 0.00113 | -1.54822          |
| <i>Hv</i> WRKY60    | <i>HORVU.MOREX.r2.7HG0539640.1</i> | <i>Hs</i> | 1830                | 987                      | 63             | 0             | 13        | 16       | 21                   | 0.91000  | 0.00515 | -0.08586          |
|                     |                                    | <i>Hv</i> |                     |                          | 105            | 0             | 9         | 11       | 12                   | 0.82000  | 0.00361 | 0.41921           |

| Genes            | Gene IDs                           | Type      | Length of<br>fl-ORF | No. of<br>valid<br>sites | No. of<br>seq. | Polymorphisms |           |          | No. of<br>haplotypes | <i>H</i> | $\pi$   | Tajima's <i>D</i> |
|------------------|------------------------------------|-----------|---------------------|--------------------------|----------------|---------------|-----------|----------|----------------------|----------|---------|-------------------|
|                  |                                    |           |                     |                          |                | <i>LoF</i>    | <i>Ns</i> | <i>S</i> |                      |          |         |                   |
| <i>Hv</i> WRKY61 | <i>HORVU.MOREX.r2.5HG0371550.1</i> | <i>Hs</i> | 1479                | 736                      | 90             | 0             | 0         | 4        | 5                    | 0.14900  | 0.00024 | -1.35226          |
|                  |                                    | <i>Hv</i> |                     |                          | 136            | 0             | 0         | 0        | 1                    | 0        | 0       | NA                |
| <i>Hv</i> WRKY64 | <i>HORVU.MOREX.r2.3HG0226640.1</i> | <i>Hs</i> | 957                 | 807                      | 90             | 0             | 0         | 1        | 2                    | 0.06500  | 0.00008 | -0.64457          |
|                  |                                    | <i>Hv</i> |                     |                          | 137            | 0             | 2         | 1        | 4                    | 0.50100  | 0.00069 | 0.13746           |
| <i>Hv</i> WRKY65 | <i>HORVU.MOREX.r2.5HG0425470.1</i> | <i>Hs</i> | 1260                | 355                      | 85             | 0             | 3         | 8        | 11                   | 0.70200  | 0.00322 | -0.52030          |
|                  |                                    | <i>Hv</i> |                     |                          | 128            | 0             | 0         | 3        | 4                    | 0.57400  | 0.00182 | 0.58766           |
| <i>Hv</i> WRKY66 | <i>HORVU.MOREX.r2.6HG0513200.1</i> | <i>Hs</i> | 1692                | 533                      | 77             | 0             | 7         | 8        | 12                   | 0.76500  | 0.00367 | -0.42524          |
|                  |                                    | <i>Hv</i> |                     |                          | 132            | 0             | 2         | 3        | 4                    | 0.43700  | 0.00175 | 0.49741           |
| <i>Hv</i> WRKY67 | <i>HORVU.MOREX.r2.5HG0400720.1</i> | <i>Hs</i> | 549                 | 524                      | 82             | 0             | 7         | 10       | 14                   | 0.82600  | 0.00567 | -0.35721          |
|                  |                                    | <i>Hv</i> |                     |                          | 126            | 0             | 2         | 6        | 6                    | 0.66500  | 0.00378 | 1.14241           |
| <i>Hv</i> WRKY68 | <i>HORVU.MOREX.r2.2HG0153650.1</i> | <i>Hs</i> | 693                 | 588                      | 75             | 0             | 4         | 5        | 11                   | 0.79000  | 0.00222 | -0.88398          |
|                  |                                    | <i>Hv</i> |                     |                          | 127            | 0             | 0         | 2        | 3                    | 0.47100  | 0.00083 | -0.19483          |
| <i>Hv</i> WRKY69 | <i>HORVU.MOREX.r2.1HG0073000.1</i> | <i>Hs</i> | 1230                | 223                      | 88             | 0             | 1         | 9        | 10                   | 0.53400  | 0.00313 | 0.19644           |
|                  |                                    | <i>Hv</i> |                     |                          | 135            | 0             | 0         | 1        | 2                    | 0.12500  | 0.00056 | 0.42403           |
| <i>Hv</i> WRKY70 | <i>HORVU.MOREX.r2.3HG0247840.1</i> | <i>Hs</i> | 825                 | 149                      | 78             | 0             | 2         | 3        | 6                    | 0.30200  | 0.00298 | -1.67988          |
|                  |                                    | <i>Hv</i> |                     |                          | 128            | 0             | 2         | 0        | 3                    | 0.09100  | 0.00103 | -0.66546          |
| <i>Hv</i> WRKY71 | <i>HORVU.MOREX.r2.7HG0584730.1</i> | <i>Hs</i> | 1026                | 709                      | 87             | 0             | 10        | 5        | 14                   | 0.58200  | 0.00152 | -1.75770          |
|                  |                                    | <i>Hv</i> |                     |                          | 129            | 0             | 7         | 1        | 7                    | 0.64600  | 0.00140 | 0.21203           |
| <i>Hv</i> WRKY73 | <i>HORVU.MOREX.r2.5HG0446310.1</i> | <i>Hs</i> | 1065                | 699                      | 87             | 0             | 13        | 10       | 11                   | 0.62200  | 0.00428 | -0.92155          |
|                  |                                    | <i>Hv</i> |                     |                          | 134            | 0             | 8         | 6        | 7                    | 0.15700  | 0.00071 | -2.15932*         |
| <i>Hv</i> WRKY74 | <i>HORVU.MOREX.r2.1HG0042200.1</i> | <i>Hs</i> | 1023                | 924                      | 74             | 0             | 6         | 9        | 23                   | 0.92700  | 0.00253 | -0.51567          |
|                  |                                    | <i>Hv</i> |                     |                          | 118            | 0             | 3         | 4        | 7                    | 0.59200  | 0.00219 | 0.84291           |

| Genes             | Gene IDs                           | Type      | Length of<br>fl-ORF | No. of<br>valid<br>sites | No. of<br>seq. | Polymorphisms |           |          | No. of<br>haplotypes | <i>H</i> | $\pi$   | Tajima's <i>D</i> |
|-------------------|------------------------------------|-----------|---------------------|--------------------------|----------------|---------------|-----------|----------|----------------------|----------|---------|-------------------|
|                   |                                    |           |                     |                          |                | <i>LoF</i>    | <i>Ns</i> | <i>S</i> |                      |          |         |                   |
| <i>Hv</i> WRKY75  | <i>HORVU.MOREX.r2.6HG0497280.1</i> | <i>Hs</i> | 684                 | 492                      | 90             | 0             | 6         | 6        | 11                   | 0.69500  | 0.00241 | -1.19886          |
|                   |                                    | <i>Hv</i> |                     |                          | 135            | 0             | 6         | 3        | 9                    | 0.59300  | 0.00171 | -1.08275          |
| <i>Hv</i> WRKY76  | <i>HORVU.MOREX.r2.3HG0273730.1</i> | <i>Hs</i> | 1155                | 341                      | 66             | 0             | 4         | 2        | 8                    | 0.72200  | 0.00316 | -0.72597          |
|                   |                                    | <i>Hv</i> |                     |                          | 112            | 0             | 2         | 2        | 3                    | 0.63600  | 0.00296 | 0.45090           |
| <i>Hv</i> WRKY79  | <i>HORVU.MOREX.r2.2HG0129050.1</i> | <i>Hs</i> | 858                 | 505                      | 82             | 0             | 9         | 14       | 17                   | 0.87100  | 0.00704 | -0.32834          |
|                   |                                    | <i>Hv</i> |                     |                          | 130            | 0             | 6         | 4        | 7                    | 0.35000  | 0.00261 | -0.48211          |
| <i>Hv</i> WRKY80  | <i>HORVU.MOREX.r2.5HG0384210.1</i> | <i>Hs</i> | 1014                | 665                      | 88             | 0             | 14        | 7        | 20                   | 0.86700  | 0.00318 | -1.47988          |
|                   |                                    | <i>Hv</i> |                     |                          | 136            | 0             | 2         | 5        | 5                    | 0.65800  | 0.00245 | 0.75630           |
| <i>Hv</i> WRKY83  | <i>HORVU.MOREX.r2.2HG0083410.1</i> | <i>Hs</i> | 867                 | 563                      | 60             | 0             | 25        | 19       | 16                   | 0.84500  | 0.01101 | -0.65394          |
|                   |                                    | <i>Hv</i> |                     |                          | 103            | 0             | 19        | 14       | 11                   | 0.73700  | 0.00831 | -0.44455          |
| <i>Hv</i> WRKY89  | <i>HORVU.MOREX.r2.3HG0226770.1</i> | <i>Hs</i> | 1011                | 926                      | 86             | 0             | 4         | 8        | 13                   | 0.31900  | 0.00037 | -2.08241*         |
|                   |                                    | <i>Hv</i> |                     |                          | 136            | 0             | 0         | 2        | 3                    | 0.50000  | 0.00059 | 0.69940           |
| <i>Hv</i> WRKY93  | <i>HORVU.MOREX.r2.5HG0384220.1</i> | <i>Hs</i> | 924                 | 629                      | 88             | 0             | 13        | 4        | 9                    | 0.53900  | 0.00581 | 0.37261           |
|                   |                                    | <i>Hv</i> |                     |                          | 136            | 0             | 11        | 3        | 5                    | 0.35800  | 0.00567 | 0.92507           |
| <i>Hv</i> WRKY95  | <i>HORVU.MOREX.r2.1HG0057190.1</i> | <i>Hs</i> | 903                 | 599                      | 82             | 0             | 19        | 6        | 19                   | 0.86100  | 0.00714 | 0.02828           |
|                   |                                    | <i>Hv</i> |                     |                          | 134            | 0             | 9         | 3        | 4                    | 0.07300  | 0.00085 | -1.79431*         |
| <i>Hv</i> WRKY96  | <i>HORVU.MOREX.r2.5HG0389690.1</i> | <i>Hs</i> | 546                 | 362                      | 77             | 0             | 13        | 10       | 22                   | 0.83400  | 0.00553 | -1.74628          |
|                   |                                    | <i>Hv</i> |                     |                          | 115            | 0             | 7         | 5        | 12                   | 0.71700  | 0.00636 | -0.41557          |
| <i>Hv</i> WRKY101 | <i>HORVU.MOREX.r2.3HG0238260.1</i> | <i>Hs</i> | 696                 | 489                      | 58             | 0             | 5         | 7        | 14                   | 0.74700  | 0.00252 | -0.89318          |
|                   |                                    | <i>Hv</i> |                     |                          | 116            | 0             | 0         | 2        | 3                    | 0.06800  | 0.00014 | -1.34749          |
| <i>Hv</i> WRKY102 | <i>HORVU.MOREX.r2.2HG0161240.1</i> | <i>Hs</i> | 1536                | 1097                     | 82             | 0             | 6         | 11       | 17                   | 0.75500  | 0.00109 | -1.49867          |
|                   |                                    | <i>Hv</i> |                     |                          | 126            | 0             | 1         | 1        | 3                    | 0.53400  | 0.00053 | 1.56650           |

| Genes            | Gene IDs                           | Type      | Length of<br>fl-ORF | No. of<br>valid<br>sites | No. of<br>seq. | Polymorphisms |           |          | No. of<br>haplotypes | <i>H</i> | $\pi$   | Tajima's <i>D</i> |
|------------------|------------------------------------|-----------|---------------------|--------------------------|----------------|---------------|-----------|----------|----------------------|----------|---------|-------------------|
|                  |                                    |           |                     |                          |                | <i>LoF</i>    | <i>Ns</i> | <i>S</i> |                      |          |         |                   |
| <i>HvWRKY105</i> | <i>HORVULMOREX.r2.2HG0091840.1</i> | <i>Hs</i> | 1059                | 432                      | 70             | 0             | 11        | 5        | 13                   | 0.74800  | 0.00463 | 0.04064           |
|                  |                                    | <i>Hv</i> |                     |                          | 129            | 0             | 8         | 3        | 7                    | 0.61100  | 0.00395 | -0.42878          |

Short reads, which were retrieved from the publically-released exome sequencing of 90 wild barley and 137 landraces (Russell et al. 2016), were subjected for mapping and SNP calling. The accessions showing sequences with missing or heterozygote were excluded for analysis. Loss-of-function variation (*LoF*), non-synonymous (*Ns*), synonymous (*S*), haplotype diversity (*H*), nucleotide diversity ( $\pi$ ). The parameters (*H*,  $\pi$ ) are calculated using DnaSP v5.10.01 with the gaps not-considered algorithm. The Tajima's *D* in the coding sequences of *WRKY*s was performed by using VCFtools v0.1.13. \**WRKY* genes with selection signature by considering the 2.5% and 97.5% quantiles of the Tajima's *D* distribution. NA, not determined.
