# Supplementary material for: Genome-Wide Characterization of WRKY Transcription Factors Revealed Gene Duplication and Diversification in Populations of Wild to Domesticated Barley
Source: MDPI journal article supplement (doi:10.3390/ijms22105354), 2021-05-19
Supplement: s1 [file s1]

**Table S8.** The primers used in this study

| primer          | Sequence (5'-3')                                     |
|-----------------|------------------------------------------------------|
| WRKY9-Gateway-F | GGGGACAAGTTTGTACAAAAAAGCAGGCTTTATGGATGGCATGGAGGAATCC |
| WRKY9-Gateway-R | GGGGACCACTTTGTACAAGAAAGCTGGGTTGGCTGGTTGGGCTGCTGC     |
