# Supplementary material for: Genome-Wide Characterization of WRKY Transcription Factors Revealed Gene Duplication and Diversification in Populations of Wild to Domesticated Barley
Source: MDPI journal article supplement (doi:10.3390/ijms22105354), 2021-05-19
Supplement: s1 [file s1]

**Table S3.** Presence and position of conserved domains identified within barley WRKY proteins using HMMER

| genes       | WRKY<br>domain         | Plant_Zn<br>_clust | NB-ARC  | Rx_N    | VQ | RVT_2 | Retrotran_gag_<br>2 | Gag_pre<br>-integrals |
|-------------|------------------------|--------------------|---------|---------|----|-------|---------------------|-----------------------|
| HvWRKY1/38  | 195-253                |                    |         |         |    |       |                     |                       |
| HvWRKY2     | 183-241                |                    |         |         |    |       |                     |                       |
| HvWRKY3     | 172-230                |                    |         |         |    |       |                     |                       |
| HvWRKY4     | 121-181                |                    |         |         |    |       |                     |                       |
| HvWRKY5     | 117-174                |                    |         |         |    |       |                     |                       |
| HvWRKY6     | 199-255<br>367-424     |                    |         |         |    |       |                     |                       |
| HvWRKY7     | 372-430                | 188-230<br>327-369 |         |         |    |       |                     |                       |
| HvWRKY8     | 288-346                | 242-285            |         |         |    |       |                     |                       |
| HvWRKY9     | 329-387                | 282-326            |         |         |    |       |                     |                       |
| HvWRKY10    | 247-305                | 195-244            |         |         |    |       |                     |                       |
| HvWRKY11    | 380-438                | 331-377            |         |         |    |       |                     |                       |
| HvWRKY12    | 104-161                |                    |         |         |    |       |                     |                       |
| HvWRKY13    | 61-118                 |                    |         |         |    |       |                     |                       |
| HvWRKY14    | 188-145                |                    |         |         |    |       |                     |                       |
| HvWRKY15    | 138-195                |                    |         |         |    |       |                     |                       |
| HvWRKY17    | 109-166                |                    |         |         |    |       |                     |                       |
| HvWRKY18    | 126-183                |                    |         |         |    |       |                     |                       |
| HvWRKY19    | 131-188                |                    |         |         |    |       |                     |                       |
| HvWRKY20    | 129-186                |                    |         |         |    |       |                     |                       |
| HvWRKY21    | 126-186                |                    |         |         |    |       |                     |                       |
| HvWRKY22    | 122-182                |                    |         |         |    |       |                     |                       |
| HvWRKY23    | 248-106                |                    |         |         |    |       |                     |                       |
| HvWRKY24    | 1377-1437<br>1492-1552 |                    | 481-725 | 304-415 |    |       |                     |                       |
| HvWRKY26    | 95-155                 |                    |         |         |    |       |                     |                       |
| HvWRKY27    | 104-164                |                    |         |         |    |       |                     |                       |
| HvWRKY28    | 124-184                |                    |         |         |    |       |                     |                       |
| HvWRKY29    | 97-157                 |                    |         |         |    |       |                     |                       |
| HvWRKY30    | 120-180                |                    |         |         |    |       |                     |                       |
| HvWRKY31    | 113-173                |                    |         |         |    |       |                     |                       |
| HvWRKY32    | 107-167                |                    |         |         |    |       |                     |                       |
| HvWRKY33    | 33-94                  |                    |         |         |    |       |                     |                       |
| HvWRKY34    | 43-104                 |                    |         |         |    |       |                     |                       |
| HvWRKY35/41 | 154-209<br>320-377     |                    |         |         |    |       |                     |                       |
| HvWRKY36    | 168-225                |                    |         |         |    |       |                     |                       |
| HvWRKY37    | 241-199                |                    |         |         |    |       |                     |                       |
| HvWRKY39    | 79-137                 |                    |         |         |    |       |                     |                       |

| genes       | WRKY<br>domain | Plant_Zn<br>_clust | NB-ARC | Rx_N | VQ | RVT_2 | Retrotran_gag_<br>2 | Gag_pre<br>-integr |
|-------------|----------------|--------------------|--------|------|----|-------|---------------------|--------------------|
| HvWRKY40    | 116-172        |                    |        |      |    |       |                     |                    |
|             | 276-331        |                    |        |      |    |       |                     |                    |
| HvWRKY42    | 276-332        |                    |        |      |    |       |                     |                    |
|             | 489-546        |                    |        |      |    |       |                     |                    |
| HvWRKY43    | 178-234        |                    |        |      |    |       |                     |                    |
|             | 345-402        |                    |        |      |    |       |                     |                    |
| HvWRKY44    | 162-221        |                    |        |      |    |       |                     |                    |
| HvWRKY45    | 74-132         |                    |        |      |    |       |                     |                    |
| HvWRKY46    | 231-287        |                    |        |      |    |       |                     |                    |
|             | 405-462        |                    |        |      |    |       |                     |                    |
| HvWRKY47    | 301-359        |                    |        |      |    |       |                     |                    |
| HvWRKY48    | 34-90          |                    |        |      |    |       |                     |                    |
| HvWRKY49/72 | 124-188        |                    |        |      |    |       |                     |                    |
| HvWRKY50    | 215-171        |                    |        |      |    |       |                     |                    |
|             | 375-432        |                    |        |      |    |       |                     |                    |
| HvWRKY51    | 168-225        |                    |        |      |    |       |                     |                    |
| HvWRKY52    | 172-230        |                    |        |      |    |       |                     |                    |
| HvWRKY53    | 49-110         |                    |        |      |    |       |                     |                    |
| HvWRKY54    | 235-293        |                    |        |      |    |       |                     |                    |
| HvWRKY55/87 | 106-166        |                    |        |      |    |       |                     |                    |
| HvWRKY56    | 167-224        |                    |        |      |    |       |                     |                    |
| HvWRKY57    | 89-145         |                    |        |      |    |       |                     |                    |
|             | 257-314        |                    |        |      |    |       |                     |                    |
| HvWRKY58    | 273-331        | 225-270            |        |      |    |       |                     |                    |
| HvWRKY59    | 300-356        |                    |        |      |    |       |                     |                    |
|             | 530-587        |                    |        |      |    |       |                     |                    |
| HvWRKY60    | 232-290        |                    |        |      |    |       |                     |                    |
| HvWRKY61    | 224-280        |                    |        |      |    |       |                     |                    |
|             | 381-438        |                    |        |      |    |       |                     |                    |
| HvWRKY62    | 140-200        |                    |        |      |    |       |                     |                    |
| HvWRKY63    | 131-188        |                    |        |      |    |       |                     |                    |
| HvWRKY64    | 157-215        |                    |        |      |    |       |                     |                    |
| HvWRKY65    | 185-241        |                    |        |      |    |       |                     |                    |
|             | 313-370        |                    |        |      |    |       |                     |                    |
| HvWRKY66    | 318-376        |                    |        |      |    |       |                     |                    |
| HvWRKY67    | 26-84          |                    |        |      |    |       |                     |                    |
| HvWRKY68    | 153-210        |                    |        |      |    |       |                     |                    |
| HvWRKY69    | 203-260        |                    |        |      |    |       |                     |                    |
| HvWRKY70    | 105-164        |                    |        |      |    |       |                     |                    |
| HvWRKY71    | 116-174        |                    |        |      |    |       |                     |                    |
| HvWRKY73    | 173-231        |                    |        |      |    |       |                     |                    |
| HvWRKY74    | 182-240        |                    |        |      |    |       |                     |                    |

| genes     | WRKY<br>domain | Plant_Zn<br>_clust | NB-ARC | Rx_N | VQ | RVT_2 | Retrotran_gag_<br>2 | Gag_pre<br>-integr |
|-----------|----------------|--------------------|--------|------|----|-------|---------------------|--------------------|
| HvWRKY75  | 153-210        | 185-230            |        |      |    |       |                     |                    |
| HvWRKY76  | 152-209        |                    |        |      |    |       |                     |                    |
| HvWRKY77  | 233-291        |                    |        |      |    |       |                     |                    |
| HvWRKY78  | 112-172        |                    |        |      |    |       |                     |                    |
| HvWRKY79  | 127-184        |                    |        |      |    |       |                     |                    |
| HvWRKY80  | 133-198        |                    |        |      |    |       |                     |                    |
| HvWRKY81  | 140-198        |                    |        |      |    |       |                     |                    |
| HvWRKY82  | 103-162        |                    |        |      |    |       |                     |                    |
| HvWRKY83  | 107-172        |                    |        |      |    |       |                     |                    |
| HvWRKY84  | 135-196        |                    |        |      |    |       |                     |                    |
| HvWRKY85  | 138-199        |                    |        |      |    |       |                     |                    |
| HvWRKY86  | 120-183        |                    |        |      |    |       |                     |                    |
| HvWRKY88  | 335-393        |                    |        |      |    |       |                     |                    |
| HvWRKY89  | 188-218        |                    |        |      |    |       |                     |                    |
| HvWRKY90  | 247-303        | 168-215            |        |      |    |       |                     |                    |
|           | 443-500        |                    |        |      |    |       |                     |                    |
| HvWRKY91  | 156-214        |                    |        |      |    |       |                     |                    |
| HvWRKY92  | 202-262        |                    |        |      |    |       |                     |                    |
| HvWRKY93  | 142-210        |                    |        |      |    |       |                     |                    |
| HvWRKY94  | 220-278        |                    |        |      |    |       |                     |                    |
| HvWRKY95  | 105-165        |                    |        |      |    |       |                     |                    |
| HvWRKY96  | 108-130        |                    |        |      |    |       |                     |                    |
| HvWRKY97  | 108-130        |                    |        |      |    |       |                     |                    |
| HvWRKY98  | 108-130        |                    |        |      |    |       |                     |                    |
| HvWRKY99  | 113-173        |                    |        |      |    |       |                     |                    |
| HvWRKY100 | 67-128         |                    |        |      |    |       |                     |                    |
| HvWRKY101 | 153-210        |                    |        |      |    |       |                     |                    |
| HvWRKY102 | 243-301        | 61-105             |        |      |    |       |                     |                    |
| HvWRKY103 | 174-234        |                    |        |      |    |       |                     |                    |
| HvWRKY104 | 127-194        |                    |        |      |    |       |                     |                    |
| HvWRKY105 | 119-179        |                    |        |      |    |       |                     |                    |
| HvWRKY106 | 121-181        |                    |        |      |    |       |                     |                    |
| HvWRKY107 | 124-187        |                    |        |      |    |       |                     |                    |
| HvWRKY108 | 133-206        |                    |        |      |    |       |                     |                    |
| HvWRKY109 | 80-140         |                    |        |      |    |       |                     |                    |
| HsWRKY1   | 195-253        |                    |        |      |    |       |                     |                    |
| HsWRKY2   | 183-241        |                    |        |      |    |       |                     |                    |
| HsWRKY3   | 166-224        |                    |        |      |    |       |                     |                    |
| HsWRKY4   | 121-181        |                    |        |      |    |       |                     |                    |
| HsWRKY5   | 117-203        |                    |        |      |    |       |                     |                    |
| HsWRKY6   | 754-810        | 922-979            |        |      |    | 537-  | 95-235              | 373-440            |
|           | 922-979        |                    |        |      |    | 656   |                     |                    |

| genes      | WRKY<br>domain         | Plant_Zn<br>_clust | NB-ARC  | Rx_N    | VQ | RVT_2 | Retrotran_gag_<br>2 | Gag_pre<br>-integr |
|------------|------------------------|--------------------|---------|---------|----|-------|---------------------|--------------------|
| HsWRKY7    | 233-291                |                    |         |         |    |       |                     |                    |
| HsWRKY8    | 288-346                | 242-285            |         |         |    |       |                     |                    |
| HsWRKY9    | 327-385                | 280-324            |         |         |    |       |                     |                    |
| HsWRKY10   | 247-305                | 195-244            |         |         |    |       |                     |                    |
| HsWRKY11   | 380-438                | 331-377            |         |         |    |       |                     |                    |
| HsWRKY12   | 104-161                |                    |         |         |    |       |                     |                    |
| HsWRKY13   | 143-200                |                    |         |         |    |       |                     |                    |
| HsWRKY14   | 171-228                |                    |         |         |    |       |                     |                    |
| HsWRKY15   | 138-195                |                    |         |         |    |       |                     |                    |
| HsWRKY17   | 109-166                |                    |         |         |    |       |                     |                    |
| HsWRKY18   | 124-181                |                    |         |         |    |       |                     |                    |
| HsWRKY19   | 131-188                |                    |         |         |    |       |                     |                    |
| HsWRKY20   | 129-186                |                    |         |         |    |       |                     |                    |
| HsWRKY21   | 126-186                |                    |         |         |    |       |                     |                    |
| HsWRKY22   | 122-182                |                    |         |         |    |       |                     |                    |
| HsWRKY23   | 195-253                |                    |         |         |    |       |                     |                    |
| HsWRKY24   | 1294-1354<br>1409-1469 |                    | 398-642 | 221-332 |    |       |                     |                    |
| HsWRKY26   | 95-155                 |                    |         |         |    |       |                     |                    |
| HsWRKY27   | 104-164                |                    |         |         |    |       |                     |                    |
| HsWRKY28   | 124-184                |                    |         |         |    |       |                     |                    |
| HsWRKY30   | 120-180                |                    |         |         |    |       |                     |                    |
| HsWRKY32   | 105-127                |                    |         |         |    |       |                     |                    |
| HsWRKY33   | 33-94                  |                    |         |         |    |       |                     |                    |
| HsWRKY34   | 43-104                 |                    |         |         |    |       |                     |                    |
| HsWRKY36   | 168-225                |                    |         |         |    |       |                     |                    |
| HsWRKY37   | 241-299                |                    |         |         |    |       |                     |                    |
| HsWRKY39   | 79-137                 |                    |         |         |    |       |                     |                    |
| HsWRKY40   | 126-182<br>286-341     |                    |         |         |    |       |                     |                    |
| HsWRK35/41 | 218-273<br>384-441     |                    |         |         |    |       |                     |                    |
| HsWRKY42   | 276-332<br>489-546     |                    |         |         |    |       |                     |                    |
| HsWRKY43   | 178-234<br>345-402     |                    |         |         |    |       |                     |                    |
| HsWRKY44   | 162-221                |                    |         |         |    |       |                     |                    |
| HsWRKY45   | 74-132                 |                    |         |         |    |       |                     |                    |
| HsWRKY46   | 231-287<br>405-462     |                    |         |         |    |       |                     |                    |
| HsWRKY47   | 301-359                |                    |         |         |    |       |                     |                    |
| HsWRKY48   | 34-90                  |                    |         |         |    |       |                     |                    |

| genes       | WRKY<br>domain | Plant_Zn<br>_clust | NB-ARC | Rx_N | VQ | RVT_2 | Retrotran_gag_<br>2 | Gag_pre<br>-integr |
|-------------|----------------|--------------------|--------|------|----|-------|---------------------|--------------------|
| HsWRKY49/72 | 124-188        |                    |        |      |    |       |                     |                    |
| HsWRKY50    | 215-271        |                    |        |      |    |       |                     |                    |
|             | 375-432        |                    |        |      |    |       |                     |                    |
| HsWRKY51    | 168-225        |                    |        |      |    |       |                     |                    |
| HsWRKY53    | 49-110         |                    |        |      |    |       |                     |                    |
| HsWRKY54    | 235-293        |                    |        |      |    |       |                     |                    |
| HsWRKY55    | 106-166        |                    |        |      |    |       |                     |                    |
| HsWRKY56    | 163-220        |                    |        |      |    |       |                     |                    |
| HsWRKY57    | 105-161        |                    |        |      |    |       |                     |                    |
|             | 273-330        |                    |        |      |    |       |                     |                    |
| HsWRKY58    | 273-331        | 225-270            |        |      |    |       |                     |                    |
| HsWRKY59    | 304-360        |                    |        |      |    |       |                     |                    |
|             | 534-591        |                    |        |      |    |       |                     |                    |
| HsWRKY60    | 236-294        |                    |        |      |    |       |                     |                    |
| HsWRKY61    | 224-280        |                    |        |      |    |       |                     |                    |
|             | 381-405        |                    |        |      |    |       |                     |                    |
| HsWRKY62    | 140-200        |                    |        |      |    |       |                     |                    |
| HsWRKY63    | 131-188        |                    |        |      |    |       |                     |                    |
| HsWRKY64    | 150-208        |                    |        |      |    |       |                     |                    |
| HsWRKY65    | 185-241        |                    |        |      |    |       |                     |                    |
|             | 337-360        |                    |        |      |    |       |                     |                    |
| HsWRKY66    | 318-376        |                    |        |      |    |       |                     |                    |
| HsWRKY67    | 128-186        |                    |        |      |    |       |                     |                    |
| HsWRKY68    | 116-173        |                    |        |      |    |       |                     |                    |
| HsWRKY69    | 203-260        |                    |        |      |    |       |                     |                    |
| HsWRKY70    | 105-164        |                    |        |      |    |       |                     |                    |
| HsWRKY71    | 116-174        |                    |        |      |    |       |                     |                    |
| HsWRKY73    | 173-231        |                    |        |      |    |       |                     |                    |
| HsWRKY74    | 182-240        |                    |        |      |    |       |                     |                    |
| HsWRKY75    | 141-198        |                    |        |      |    |       |                     |                    |
| HsWRKY76    | 149-206        |                    |        |      |    |       |                     |                    |
| HsWRKY77    | 235-293        | 187-232            |        |      |    |       |                     |                    |
| HsWRKY78    | 204-264        |                    |        |      |    |       |                     |                    |
| HsWRKY79    | 127-184        |                    |        |      |    |       |                     |                    |
| HsWRKY80    | 133-198        |                    |        |      |    |       |                     |                    |
| HsWRKY81    | 140-198        |                    |        |      |    |       |                     |                    |
| HsWRKY82    | 103-162        |                    |        |      |    |       |                     |                    |
| HsWRKY83    | 110-175        |                    |        |      |    |       |                     |                    |
| HsWRKY84    | 135-196        |                    |        |      |    |       |                     |                    |
| HsWRKY88    | 380-438        |                    |        |      |    |       |                     |                    |
| HsWRKY89    | 188-245        |                    |        |      |    |       |                     |                    |

| genes     | WRKY<br>domain     | Plant_Zn<br>_clust | NB-ARC  | Rx_N    | VQ        | RVT_2 | Retrotran_gag_<br>2 | Gag_pre<br>-integr |
|-----------|--------------------|--------------------|---------|---------|-----------|-------|---------------------|--------------------|
| HsWRKY90  | 230-286<br>426-483 |                    |         |         |           |       |                     |                    |
| HsWRKY91  | 156-214            |                    |         |         |           |       |                     |                    |
| HsWRKY93  | 148-216            |                    |         |         |           |       |                     |                    |
| HsWRKY94  | 220-278            | 168-215            |         |         |           |       |                     |                    |
| HsWRKY95  | 105-165            |                    |         |         |           |       |                     |                    |
| HsWRKY99  | 83-143             |                    |         |         |           |       |                     |                    |
| HsWRKY100 | 67-128             |                    |         |         |           |       |                     |                    |
| HsWRKY101 | 82-139             |                    |         |         |           |       |                     |                    |
| HsWRKY102 | 243-301            |                    |         |         |           |       |                     |                    |
| HsWRKY104 | 116-183            |                    |         |         |           |       |                     |                    |
| HsWRKY105 | 119-179            |                    |         |         |           |       |                     |                    |
| HsWRKY108 | 133-206            |                    |         |         |           |       |                     |                    |
| HsWRKY109 | 411-471            |                    |         |         |           |       |                     |                    |
| HsWRKY110 | 108-130            | 63-105             |         |         |           |       |                     |                    |
| HsWRKY111 | 108-128            | 63-105             |         |         |           |       |                     |                    |
| HsWRKY112 | 108-135            | 62-105             |         |         |           |       |                     |                    |
| HsWRKY113 | 23-89              |                    |         |         |           |       |                     |                    |
| HsWRKY114 | 8-65               |                    |         |         |           |       |                     |                    |
| HsWRKY115 | 1264-1325          |                    | 379-633 | 196-316 | 58-<br>85 |       |                     |                    |
| HsWRKY116 | 122-182<br>267-327 |                    |         |         |           |       |                     |                    |
