# Supplementary material for: Genome-Wide Characterization of WRKY Transcription Factors Revealed Gene Duplication and Diversification in Populations of Wild to Domesticated Barley
Source: Int J Mol Sci. 2021 May 19;22(10):5354. doi: 10.3390/ijms22105354 (PMC8160967; doi:10.3390/ijms22105354)
Supplement: Supplementary file 1 [file ijms-22-05354-s001.zip]

Archive with 9 entries (9 files):
- Table S4-Tandemly and segmentally duplicated genes identified in HvWRKYs.XLSX
- Table S5-Passport information of 227 barley accessions and the haplotypes of five HvWRKYs.xlsx
- Table S6-Sequence diversity and selection statistics of WRKY genes in wild and cultivated barley populations.pdf
- Table S7-Information of HvWRKY9 haplotypes.XLSX
- Table S8-The primers used in this study.pdf
- Supplementary_Material_Figures.pdf
- Table S1-The WRKY genes identified from cultivated barley.XLSX
- Table S2-The WRKY genes identified from wild barley.XLSX
- Table S3-Presence and position of conserved domains identified within barley.pdf
