# Supplementary material for: Genome-Wide Characterization of WRKY Transcription Factors Revealed Gene Duplication and Diversification in Populations of Wild to Domesticated Barley
Source: Int J Mol Sci. 2021 May 19;22(10):5354. doi: 10.3390/ijms22105354 (PMC8160967; doi:10.3390/ijms22105354)
Supplement: Supplementary file 1 [file ijms-22-05354-s001.zip › Table S1-The WRKY genes identified from cultivated barley.XLSX]

## Sheet: Sheet1
Table S1. The WRKY genes identified from cultivated barley
WRKY ID	Gene ID	Chromosome location	WRKY groups	WRKY motif	CDS (bp)	NA	MW (Da)	pI	II	Ai	GRAVY	SP	Subcellular location	Coding sequence	Amino acid sequence
HvWRKY1/38	HORVU.MOREX.r2.6HG0471210.1	6H:114643657-114644827	IIa	WRKYGQK	1062	353	38617.4	8.14	60.93	62.52	-0.771	no	nucleus	ATGGATCCATGGATGGGCAGCCAGCCATCCCTGAGCCTCGACCTGCACGTCGGCCTACCGCCGATGGGGCACCCGCACCACCACCAGAGCCAATACCAGGCGCCGCCGATGATCGCGCTGGCCAAGCCCAAGATCCTCGTGGAGGAGAACTTCATGCCGCTCAAGAAGGACCCTGAGGTTGCGGTTCTTGAGTCGGAGCTACAGCGGGTGAGCGAGGAGAACCGGCGGCTGGGCGAGATGCTCAGGGAGGTGGCCTCCAAGTACGAGGCCCTGCAGGGCCAGTTCACCGACATGGTCACGGCCGGCGGCAACAACAACCACTACCACAACCAGCCGTCCTCCGCGTCGGAGGGCGGGTCGGTGTCGCCGTCGAGGAAGCGCAAGAGCGAGGAGAGCCTC…	MDPWMGSQPSLSLDLHVGLPPMGHPHHHQSQYQAPPMIALAKPKILVEENFMPLKKDPEVAVLESELQRVSEENRRLGEMLREVASKYEALQGQFTDMVTAGGNNNHYHNQPSSASEGGSVSPSRKRKSEESLGTPPPSHTQQQHYAAGLAYAVAPDQAECTSGEPCKRIREECKPVISKRYVHADPSDLSLVVKDGYQWRKYGQKVTKDNPCPRAYFRCSFAPGCPVKKKVQRSAEDKTILVATYEGEHNHTQPPPSQPQQQNDGSGAGKNAGNGKPPQAPATPHHPQQQHKQEAAAVVVSGESAAAASELIRRNLAEQMAMTLTRDPSFKAALVTALSGRILELSPTRDIN
HvWRKY2	HORVU.MOREX.r2.7HG0616250.1	7H:616777574-616778642	IIa	WRKYGQK	960	319	34302.6	9.21	52.56	68.21	-0.637	no	nucleus	ATGGAGGAGCAGTGGATGATCGGGCAGACTTGCCTCAGCCTCGCCCTCGGTGTCGGCCAGCCGACGGCGCCGCGAGGTGCTCCCCCGGTGACCAAGGTGCTCGTGGAGGAGGACTTCATGTCCTCCAAGAAAAATCACGAGGTTGAGGCGCTGGAGGCGGAGCTCCGGCGAGTGGGCGAGGAGAACAGGAGGCTGGTCGACATGCTCCGCGCGCTGGTGGCCAAGTACTCCGACCTGCAGGGAAAGGTCAGCGGCATGATGGCGGCGGCCAACAACCACCACCAGTCGTTGACTACGTCTGAGGGCAGTTCCGCGGCCTCGCCGGCCAGGAAGCGCGCCCGCAGCGACAGCCTGAACACCGCCGACCGCAATCCTTCGCCACCGCTCGCCGCAGCCGGC…	MEEQWMIGQTCLSLALGVGQPTAPRGAPPVTKVLVEEDFMSSKKNHEVEALEAELRRVGEENRRLVDMLRALVAKYSDLQGKVSGMMAAANNHHQSLTTSEGSSAASPARKRARSDSLNTADRNPSPPLAAAGSVNVGPGQPECTSVHEPGDSKRVRADEDKASRVSKVYVHADPSDLSLVVKDGYQWRKYGQKVTKDNPCPRAYFRCSSAPSCQVKKKVQRSAEDKTVLVATYDGDHNHAPPPKHQGSGGRKSGDAAPVRVSPPAPVLVQQQREQEASTADQVADRKKLVEQMAATLTRDPGFKAALVSALSGRIPVA
HvWRKY3	HORVU.MOREX.r2.5HG0400750.1	5H:452777224-452779164	IIa	WRKYGQK	996	331	35766.3	8.02	55.01	58.7	-0.612	no	nucleus	ATGGAAACGGCGCGGTGGTCGCCCGTCTGCCTCGACCTCATGGTCGGGCTACCCATGGTGCGCGAGCCGTCTCCGGCGAGGCGCGCCGGAATGAGAACCCAAGCTGACATTGCTAGCTCACCCTGCGGCAGAGCAGCTTCCATGACCAACGGCGAGGCTAGTAAGATGATGGAGGCGAAATTCACGGAGGTAAGCGAGGAGAACCGGAGGCTGACGGAGATGATCGGCTACCTGTACGCTAACCAGAGTTTCGCGCGACACAGCCCCGAAGGGGACGGCGAGCAGCCCGCGAGCACCGCCGCGTCGCCGACATCACCGGTGGGCAAGAAAAGGAGCAGGGAGAGCATGGACACGTCGGATTCCGGCGATGGCAACAGCGACAAGAAGATGACTGGTATG…	METARWSPVCLDLMVGLPMVREPSPARRAGMRTQADIASSPCGRAASMTNGEASKMMEAKFTEVSEENRRLTEMIGYLYANQSFARHSPEGDGEQPASTAASPTSPVGKKRSRESMDTSDSGDGNSDKKMTGMVEAEHVDVESPLSNGTCRRIKVKRVCTRIDPSDTSLVVKDGYQWRKYGQKVTRDNPSPRAYFRCAFAPSCPVKKKVQRSAEDSSMVEATYEGEHNHPRPTRAGELPSCAAGGGGPVPCSISINSSGPTITLDLTKDGGGVQVVEAAGEAQPDLKKVCREVASPEFRAALVEQMARELTGDRKFTDALAAAILRKLPDY
HvWRKY4	HORVU.MOREX.r2.2HG0091860.1	2H:36926474-36928298	III	WRKYGQK	1047	348	36554.3	6.75	61.51	55.26	-0.445	no	nucleus	ATGACATCTTGTGGCGGCGCTGGCGATGACGGCGGGCGCTCACGGCCGGCGGCGGTCTACGACGACCTGGTGGAGGTGCGGGAGCACGCGGCGACGCTGCACAGCATGCTGCAGGGGTCGCCGAGCGTGTCGGCCGTGGACGCGAGGGAGCTGATGAAGGGGATGATGGCCAAGCTGTCCAGCGCTATGTCGGTGCTGGGCACCACCAGCGGCGGCGTGGAGGCGTCTTCGGAGGCTGGTGGTCGGGGTCCAGGTGGGAGGAGGAAGAGATCGGGCACGGTATCCGGGCCGCACCGCCGGAGCACCTCCACGAGAAGGTCGAAGAGCCCTTTCATCAACATGGTCACTGCTAGGACGCTCAACGATGGCAAGACATGGAGGAAGTACGGCCAAAAATGT…	MTSCGGAGDDGGRSRPAAVYDDLVEVREHAATLHSMLQGSPSVSAVDARELMKGMMAKLSSAMSVLGTTSGGVEASSEAGGRGPGGRRKRSGTVSGPHRRSTSTRRSKSPFINMVTARTLNDGKTWRKYGQKCIHACTNPRSYYRCSHKPDQGCQATRQVQESDSNPSEYLISYYGQHTCKDPSTFRSLIIQGAADAAPPEDLPNLISFTSINGAAAASTSSSPNHLVRDATDLHSMLFSRFSNYSSSPPVQEGVSSSSPSPSFHGEFTQYAGGQLVDVIGRRTSPLTVGSAPAEYWPVVGIAGVDTDAGAGMDSFPSSPSSLGFMSGSFGGSFGNNVCDDDLFGFDS
HvWRKY5	HORVU.MOREX.r2.3HG0222170.1	3H:335694136-335695039	IIc	WRKYGKK	714	237	25904.5	6.65	56.09	54.01	-0.743	no	nucleus	ATGTCCTCGTACTCGTCCCTCATCTCTGTGAGCCCCGGCGAGCAGATCGGTGGGTATGCGGACCAAGGTGACGACGACGACATGGCGGCCGCCGCTAACTACCTATCATCATTCTGCTTTGATTTTGGCGACGAGTATTCCGTAGGGGAGGCAGCAACAGCCTCCTACCCCTTGCACGGACAGCAGCAGCAGGCGCCGACCAAAGCCGACAGCCACCACAGCGGCCAAGCAGCAAGTATTACCAGTTCACAGAGATTCGACAATATCAACACGAGCTTGACGAGCAGCGACGCGAGGAGCAAAGGCAGTAAGATCGCGTTCAAGACGAGGTCGGAGGTGGAGGTGCTGGATGACGGGTACCGCTGGAGGAAGTACGGCAAGAAAATGGTCAAGAACAGC…	MSSYSSLISVSPGEQIGGYADQGDDDDMAAAANYLSSFCFDFGDEYSVGEAATASYPLHGQQQQAPTKADSHHSGQAASITSSQRFDNINTSLTSSDARSKGSKIAFKTRSEVEVLDDGYRWRKYGKKMVKNSPNPRNYYRCSSEGCRVKKRVERDRDDERFVITTYDGVHNHLAPLPPQGCAGYSLSLAQTRVDEGSSPLPMEGRRCFLDAMKMHAAGSLAGSSPVPAPRTLERHN
HvWRKY6	HORVU.MOREX.r2.7HG0577260.1	7H:333350632-333379901	I	WRKYGQK	1566	521	57082.2	7.25	59.86	66.28	-0.734	no	nucleus	ATGGCCGACGGCGAGCCGGAGGCGCCGGCAGAGGATATCCATCCATGCCCGGAGGCGTCGTCAGCCGAGGTGGAGAAGCACCCGCCGCCGGAAGCCCCCGAGGCGTCTCCGGCCAAGACGAAGCCAGAGAAGAAGGTGGTGACGGAGACGCTGGTGAAGGAGGTGAGCAAGTCGGGACCGAAGGAGATAGAGAAAGAGGTGAAGGTGAAAGTGGAGAAGGAGAAGGAAAATGTGGAGATCGAGGCGACGCTGCAGCCGACCGGAGCTGGCACGGAGGCTCCCATCCTTGCGGTGCCGATGTTGGCCGTGCCGTGCTTCATCGCTCCTCCAGGGTTTGCGGGCCAGTTTGCAATGAGCCATCAAGCAGCTTTGTCAAGTGTTACAGCTCAGGCACAAATA…	MADGEPEAPAEDIHPCPEASSAEVEKHPPPEAPEASPAKTKPEKKVVTETLVKEVSKSGPKEIEKEVKVKVEKEKENVEIEATLQPTGAGTEAPILAVPMLAVPCFIAPPGFAGQFAMSHQAALSSVTAQAQIQLQSPASSAYSEGLPSPFPHPITPKAIRPLQQAPSVTQGSVGRPIAERPSSSESKLQHHAAINIVGDGFNWRKYGQKQVKSSDNSRSYYRCTNSSCLAKKKVEHCPDGRIIEIIYRGTHSHEPPQKTRFVKERLPHIYVPPIGDETLQLANSEIVESRTMTCKLNKSEAIENSEQQLFCSSDCEGDVGNKSEDEHRSAESQPKRRIVEATTSNLTPVLRTVREQKIIVQAAKMSDGYRWRKYGQKIVKGNPNPRSYYRCTHDGCPV…
HvWRKY7	HORVU.MOREX.r2.2HG0159830.1	2H:614907561-614909218	IId	WRKYGQK	1398	465	49169.6	10.25	56.12	65.68	-0.403	no	nucleus	ATGGCCGTGGACCTCATGGGCTGCTACACCCCGCGACGCGCCGACGACCAGCTCGCCATCCAGGAGGCCGCCACCGCCGGCCTCCGCAGCCTGGAGCTCCTGGTCTCCTCCCTCTCCGGCGCGGCGCCGTCCAAGGCGCAGCAACACCAGCACCAGCAGCCGTTCGGCGAGATCGCCGACCAGGCCGTCTCCAAGTTCCGCAAGGTGATCTCCATCCTCGACCGCACCGGCCACGCCCGCTTCCGCCGCGGCCCCGTCCAGTCACCGCCGCCGCCGCCTCCTCCAGCTCCGGTCGCTCCTCCGCCTCCCCCACCGCGCCCTCTCGCCATCGAGCCGGCCAGGCCGGCCCCTTTGACCGTCGTGGCGCCGGTGTCGGTGGCCGCCCCGGTCCTTCAGCCG…	MAVDLMGCYTPRRADDQLAIQEAATAGLRSLELLVSSLSGAAPSKAQQHQHQQPFGEIADQAVSKFRKVISILDRTGHARFRRGPVQSPPPPPPPAPVAPPPPPPRPLAIEPARPAPLTVVAPVSVAAPVLQPQSLTLDFTKPNLTMSGATSVTSTSFFSSVTAGEGSVSKGRSLVSAGKPPLSGHKRKPCAGAHSEANTTGSRCHCSKRRKNRVKTTVRVPAVSAKIADIPPDEYSWRKYGQKPIKGSPYPRPAPLTVVAPVSVAAPVLQPQSLTLDFTKPNLTMSGATSVTSTSFFSSVTAGEGSVSKGRSLVSAGKPPLSGHKRKPCAGAHSEANTTGSRCHCSKRRKNRVKTTVRVPAVSAKIADIPPDEYSWRKYGQKPIKGSPYPRGYYKCST…
HvWRKY8	HORVU.MOREX.r2.5HG0360410.1	5H:48927571-48929328	IId	WRKYGQK	1068	355	38102.4	10.17	62.22	61.58	-0.597	no	nucleus	ATGGAGGAGGTGGAGGTGGCCAACAGCGCGGCTGTGGAGAGCTGCCACAAGTTGCTGGCCTTGCTCTCCCAGCAGCAGGACCCAGCCCTGCTCAGGAGCATAGCTTCAGAGACGGGTGAGGCATGTGCCAAGTTCAGGAAGGTGGTCTCCCTCCTCAGCAATGGTGGCGGCGGCAGGGGAGGGCATGCTAGAGGCAGGTTCTCCAGGAGAAGGAAGCCCGTGGGGTTCTTGAGCCAGAAAGGCTTCTTGGAGAGCAGCAGCAACGCCCCATTGGGGATGCTCGTGTCCGGGAGTGCACCCACTCCATCCCCATCTGCTGGTTCGGCAGGGCAACTGCGGCCCCAGGTCGGCGCGCCGCCGCCGCCCCCGCGCAGCCTCGATTTGGTCAGCTCAAGCAGC…	MEEVEVANSAAVESCHKLLALLSQQQDPALLRSIASETGEACAKFRKVVSLLSNGGGGRGGHARGRFSRRRKPVGFLSQKGFLESSSNAPLGMLVSGSAPTPSPSAGSAGQLRPQVGAPPPPPRSLDLVSSSSKSAHQFGPPKMVQPLSVQFQFGATAHRYPFQQQQQQNLQAQMFKRSNSGISLKFDSPSGGTGTISSPRSFMSSLSMDGSVASLDGKPPMRLIGGPAASDPLNVRQCAPKRRCRGEDGSGKCTTGGKCHCSKRRKLRIKRSIKVPAISNKISDIPPDEYSWRKYGQKPIKGSPHPRGYYKCSTVRGCPARKHVERCVDEPAMLIVTYEGEHSHNRLPTQSAQT
HvWRKY9	HORVU.MOREX.r2.5HG0423130.1	5H:532918441-532920321	IId	WRKYGQK	1188	395	42516.2	10.03	53.4	58.61	-0.646	no	nucleus	ATGGATGGCATGGAGGAATCCAACAGGGAGGCGGTGCAGAGCTGCTACAAGGTGCTGAACCTCCTCTCCAACCCCCGTGGCCAGCTCGTTCCCCACAAGGAGCTCGTGGAGGCCACGGGCGCCGCCGTCGCCAAGTTCGGCTCCCTAGCTTCCAAGATCGGCGACGGCAATGGCAGACAAGGCCATGCTAGGTTCAGACAAAGGATCAAGAAGCCCATGCCTCTCTTTGACAGCAACCTCTTCCGGGAGAGCCCTGCATCGGCTGCGGCTGCTGATGCTGCAGCTGCACCTAAGACATCCAATCCTGGCCCGAGCACTAGTCTCCAGCTCTTTCCTAGGTACCAGCAGATGGAGGGCTCCTCTTCGAAGGACCCTGTCAGGATCCCAGCCCAGTTCCCC…	MDGMEESNREAVQSCYKVLNLLSNPRGQLVPHKELVEATGAAVAKFGSLASKIGDGNGRQGHARFRQRIKKPMPLFDSNLFRESPASAAAADAAAAPKTSNPGPSTSLQLFPRYQQMEGSSSKDPVRIPAQFPQRMVVENPSVGSNGPARGPPLQLVQPVSVAPPAGTPTPALPAAHLHFIQQQQSYQRFQLMHQMKLQSEMMKRGGHGDQGQGGSTSGGKGVNLKFDGSNCTGSSSRSFLTSLSLEGSMASMDGSRSSRPFQLVSGSQTSSTPELGLMQQRRRCAGKEDGSGRCATGSRCHCAKKRKLRIRRSIKVPAISNKVADIPADEFSWRKYGQKPIKGSPHPRGYYKCSSVRGCPARKHVERCVDDPAMLIVTYEGDHNHNRAAAAQPA
HvWRKY10	HORVU.MOREX.r2.2HG0130750.1	2H:406148815-406150014	IId	WRKYGQK	957	318	33614.8	9.61	53.98	56.19	-0.592	no	nucleus	ATGATGACCATGGATCTGATTGGAGGATACGGGAGGGCGGACGAGCAGGTGGCAATCCAGGAGGCGGCGGCGGCGGGGCTGCGCGGGATGGAGCACCTCATCTTGCAGCTCTCCCGGACAGGCACCAGCGAAAGCTCGCCGGTTGGGTCCTCGGAGGCGCCGGAGCAGGGGAAGCAGCAGGTAGACTGCCGGGAGATCACTGATATGACCGTGTCGAAGTTCAAGAAGGTGATTTCTATCCTCAACCACCGCACCGGTCACGCCAGGTTCCGGCGCGGGCCTGTGGTGGCGCAGTCCCAGGGCCCCGCCGTGTCCGAGCCGGCGCCGGTGAGGGCGTCTTCGTCGAGGTCCATGACGTTGGACTTCACCAAGGCGTCTTCCGGGTACGGAAACGACCCC…	MMTMDLIGGYGRADEQVAIQEAAAAGLRGMEHLILQLSRTGTSESSPVGSSEAPEQGKQQVDCREITDMTVSKFKKVISILNHRTGHARFRRGPVVAQSQGPAVSEPAPVRASSSRSMTLDFTKASSGYGNDPGFSVSAASSSFMSSVTGDGSVSNGRGGGSSLMLPPPPSASCGKPPLASSVASTGAGAGAGQKRKCHDHAHSENVAGGKYGASGGRCHCSKRRKSRVRRMTRVPAISSKAAEIPADDFSWRKYGQKPIKGSPYPRGYYKCSTVRGCPARKHVERDPSDPSMLIVTYEGEHRHSPADQEPLTPLQEL
HvWRKY11	HORVU.MOREX.r2.5HG0432220.1	5H:559013058-559014814	IId	WRKYGQK	1359	452	48080.6	9.2	59.67	64.91	-0.434	no	nucleus	ATGGAGGGGGTGGAGGAGGCCAACCGTGCGGCGGTGGTGAGCTGCAAGAGGCTGGTCGCGCGCCTCTCGCTGTCCGCCGGCGACCCGTTCCGGCTCGCCGCCGTCGCGGCCGAGACCGAAGAGGCCGTGTCCCGGTTCGGCAAGGTGGTCAACATCCTCAGCAGCAGGGTCGGCCATGCGAGGGCCAGGGTCGGCCGGAGGAGCTCGCCGGCCGGCGATCCCATTGCGAGGTGCCTCCTTGAGTACCACCCTCCCCCGCCGGTGCCGTATTGCCCACCTGCCACTGCCACTGCCACTGCCACTGCCCCCCAGCTCCATGGGAGTAGCAGTAGCACTCCTGCGCCGCCGACGCCGCTGAAGCAGATGCCGGTGCCGGTGGTGGCGGCAGCTCCTTGTGCC…	MEGVEEANRAAVVSCKRLVARLSLSAGDPFRLAAVAAETEEAVSRFGKVVNILSSRVGHARARVGRRSSPAGDPIARCLLEYHPPPPVPYCPPATATATATAPQLHGSSSSTPAPPTPLKQMPVPVVAAAPCAAGNGKVVAPADNCDADRDMFFDTPLLDLSGCSVTPASIAAAQINGSRVSAAPAAKPTDRGMFFQTPLLDLSGCGVTPASIAAAQINGSRVSAAPAASHPPPPPPPPPPQILFHHQIPQQQQQKKRPLEQQRPASSDNKRFHFEQKPASEKPFHIEIPAARSGKEPEVITFSFDNSVCTSSAATSFFTNMSSQLITMSESSACAPASRKAAHKADDDGKCHCPKKKKPREKRVVRMPAVSDKVADIPSDNYSWRKYGQKPIKGSPHP…
HvWRKY12	HORVU.MOREX.r2.2HG0079820.1	2H:2656063-2660567	IIc	WRKYGQK	591	196	21520.4	8.83	40.6	45.2	-0.96	no	nucleus	ATGGAGAATTATCCCATTCTGTTTGGGACGCAGCCCTCATCTTCCACCTCCAACTCATACCACTTCGTGGCAGGAGCGAGCAGCCATCACCATGGTCAAGCAGCTGGCAATAACACCGGCGGCGGCCTCTTCTCGGCGTCCAAGCAGGAGGAGCCCTCCGACGGTGGTGGTGGCGATGATGGTGCAGGAAGCAGCTCGCAGGGCGGCGGCGGCGAGGCCGACGTCGTCGTCGTCGGGAAGAAGAAAGGCGAGAAGAGGGAGCGGCGGCCACGGTTCGCGTTCCAGACGCGCAGCCAGGTCGACATCCTCGACGACGGCTACCGGTGGAGGAAGTACGGGCAGAAGGCCGTCAAGAACAACAACTTCCCCAGGAGCTACTACCGGTGCACACATCAAGGA…	MENYPILFGTQPSSSTSNSYHFVAGASSHHHGQAAGNNTGGGLFSASKQEEPSDGGGGDDGAGSSSQGGGGEADVVVVGKKKGEKRERRPRFAFQTRSQVDILDDGYRWRKYGQKAVKNNNFPRSYYRCTHQGCNVKKQVQRLSRDEGVVVTTYEGTHTHPIEKSNDNFEHILTQMQVYSGLNNVSQTFGNQHMFQ
HvWRKY13	HORVU.MOREX.r2.1HG0067480.1	1H:495274728-495277013	IIc	WRKYGQK	420	139	15309.3	10.11	29.35	61.08	-0.75	no	nucleus	ATGGTGAACGGCAGGGCGGCCGGGGCGGCGGCGCCGGAGATCGGTGCCGGGAGCAGCAGTGGGGTGGGGGTGGGAAGGGATCAGGAGACGAAGGGGAAGGGCGGCGCGCGCGGGCGGGGGAGCAGGAAGGCTAGCCGGCCGCGGTTCGCGTTCCAGACCAAGAGCGAGAACGACGTCCTCGACGACGGCTACCGGTGGAGGAAGTACGGCCAGAAGGCCGTCAAGAACAGCGCCTTCCCCAGGAGCTACTACCGGTGCACGCACCACACGTGTAACGTGAAGAAGCAGGTGCAGCGGTTGGCGAAGGACACGAGCATCGTGGTGACCACGTATGAGGGCGTGCACAACCACCCATGCGAGAAGCTCATGGAGGCACTCAACCCCATCCTCAGGCAGCTT…	MVNGRAAGAAAPEIGAGSSSGVGVGRDQETKGKGGARGRGSRKASRPRFAFQTKSENDVLDDGYRWRKYGQKAVKNSAFPRSYYRCTHHTCNVKKQVQRLAKDTSIVVTTYEGVHNHPCEKLMEALNPILRQLQFLSQL
HvWRKY14	HORVU.MOREX.r2.3HG0197780.1	3H:56785678-56790906	IIc	WRKYGQK	795	264	27917.4	9.96	45.59	55.23	-0.557	no	nucleus	ATGATGTTCCCATCACCAGGGGGAGCGGCGATGGCGCTGGCCCACGGCCAAGCAGCTTCCAGGGGCGCAACGACGGCCGGCGGCGCCGCGACAGCCATAACCTTCAGCTTCCAGCAGCCCTCCGATCCTCCTCTGAACGGCGGCCTCTCCCACCACCATGGTCTCCTAGGTTACAGCCCCCTCGTACTAGACCACCCAACCACCACCACTTCGTCCTCCTCCACTATCCCCGCCGCTCCCTCCCTTCACCACCTCCATGCACCTGCCGGAGCCATCCATCCCCCGAGGTCATCGCCTCCACATCCATGGTCTAGCGAGGAAGCTGATCGAGAAAGGCAGAGGGGGAAGGCCGCGGTTACGGGCATGGCGGTTAACAGCGCGCCGGCGGGGGGAAGTGGA…	MMFPSPGGAAMALAHGQAASRGATTAGGAATAITFSFQQPSDPPLNGGLSHHHGLLGYSPLVLDHPTTTTSSSSTIPAAPSLHHLHAPAGAIHPPRSSPPHPWSSEEADRERQRGKAAVTGMAVNSAPAGGSGGGGRSHGPAAAVAAGMGVGAVRMKKAAGGGAVKARRKVREPRFCFKTMSDVDVLDDGYKWRKYGQKVVKNTQHPRSYYRCTQDKCRVKKRVERLAEDPRMVITTYEGRHVHSPSRDDDDAARANAEMSFIW
HvWRKY15	HORVU.MOREX.r2.5HG0425110.1	5H:538869596-538872906	IIc	WRKYGQK	930	309	32546.1	5.89	61.74	56.96	-0.496	no	nucleus	ATGGCCGGCGCCGCGGGAGAGAGGCCGGAGGGGGTGGGCGGAGGCGGGGACTGGCCGCCGTTCGCCGGCGACGCCTTCGCGGAGTACTCCTCCTCGGTGTTCGCGGAGCTGGGCGGATGGCCGGACGGCCTCGGCGCGGGCACCGGGGAGCTGCAGTCGCTGGATCTGCCGGAGGCCAGCGCGTCCGCTTCGGTCCCGCTGGCGCGGCCGGACGAGATGCTGCCGGCCGCGTCCTCCTGCTCGAGCGGCGACGGCGCGCCCGCGGCCGCCACGGAGAACGCCGACAGGCCGCAGTCCGCCGCCGACGCAGCGAGCATGAAGCCGGCGGCGGCGACGGCGACGAAGAAGGGGCAGAAGCGGGCGCGGCAGCAGCGGTTCGCCTTCGTGACCAAGAGCGAA…	MAGAAGERPEGVGGGGDWPPFAGDAFAEYSSSVFAELGGWPDGLGAGTGELQSLDLPEASASASVPLARPDEMLPAASSCSSGDGAPAAATENADRPQSAADAASMKPAAATATKKGQKRARQQRFAFVTKSEVDHLEDGYRWRKYGQKAVKNSPFPRSYYRCTNSKCTVKKRVERSSEDPTVVITTYEGQHCHHQTSFQRGGGMHFHGAATVALAEQMSFVPTQQLYNLPPLRRLQMNPGSSESAVSSMPPSLQQLNGGDDLGRSTSYSPTASAVQTPSSLVPPDVSFDMGLLGDIVPPGNYLPTGYI
HvWRKY17	HORVU.MOREX.r2.1HG0023190.1	1H:135410187-135410786	IIc	WRKYGKK	600	199	22034.3	6.37	46.23	55.48	-0.652	no	nucleus	ATGGCGGCTTCGTTGGGACTGAACCCTGAAGCTGTCTTCAGCTCCGCCTTCGCCTACTCCTCCCCTTTCGTGGCCGATCACTGCGCGCCGCCCGCCCGCGCCGTCGTCGACGATACTGATTACGCGGCTCAGCTCGACCTCCACGACGATCATCAGCACTACCCTTTCGACCAGTTCGAGTACTCGCCGCCGACGCCGACGGCACAGATCTCCTTCGCCGGCGCCGGGGATGATGAACATCGCAGCGAGAAGACGATCAAGATCAGTACGAGGGTGAGCGCAGGGAGGATCGGGTTCAGGACGAGGTCAGAGGTGGAAATCTTGGACGACGGTTTCAAGTGGAGGAAGTACGGGAAGAAGGCGGTGAAGAACAGCCCGAACCCGAGGAACTACTACCGG…	MAASLGLNPEAVFSSAFAYSSPFVADHCAPPARAVVDDTDYAAQLDLHDDHQHYPFDQFEYSPPTPTAQISFAGAGDDEHRSEKTIKISTRVSAGRIGFRTRSEVEILDDGFKWRKYGKKAVKNSPNPRNYYRCSAEGCGVKKRVERDRDDPRYVVTTYDGVHNHATPGAAEQYYCYSPPRSVVSSPPTAYSAAGLLQF
HvWRKY18	HORVU.MOREX.r2.3HG0236250.1	3H:467062537-467064841	IIc	WRKYGKK	633	210	22296	8.71	45.73	60.48	-0.391	no	chloroplast	ATGCGCATGGCGGTAGCTGGAGCCGTGGCAGCGTATCGCTTCCACCCGCACGCCGCCGGCGTCGGCCGCTCGATGGCGTTTCCCCGCCCGTCGCCGTCGGGGTCCGGCTGCCCATACGGCCGCTCTGGAGCCTCGTTGAGCTCTCCCGCCTTTGGTGCGGCCGCCGGGCCCGAGGTGCTTATGCAGCAGCTAGACGTCCTGGACTACTTGTCGGACGACGGCGGGGTGCCCGGCACGGCCGGCGCACCGCTGCCGGTAGAAGCGCCGGTTGTGCCGGATGTTGGTTACTCTGATCATACGAGTAGGGCGGCCGCGGTGGCGGTGGCGGCGAGCGGCAAGATCGCGTTTCGGACGAGGTCGGAGGAGGAGATACTGGATGACGGCTACAAGTGGAGGAAG…	MRMAVAGAVAAYRFHPHAAGVGRSMAFPRPSPSGSGCPYGRSGASLSSPAFGAAAGPEVLMQQLDVLDYLSDDGGVPGTAGAPLPVEAPVVPDVGYSDHTSRAAAVAVAASGKIAFRTRSEEEILDDGYKWRKYGKKSVKNSPNPRNYYRCSTEGCNVKKRVERDKDDANYVVTMYEGVHNHASPGMIYYAAQDPASGRFFVTGTHHLAP
HvWRKY19	HORVU.MOREX.r2.1HG0066230.1	1H:492114032-492114815	IIc	WRKYGKK	657	218	22935.4	6.82	57.77	58.85	-0.333	no	nucleus	ATGGCGGCAGTCGGAGCGGCACCAGTGCTCTACCAACAGCAGGCGCAGGCGGTGGGCGACGCCTGCTTCTTCTCCTCCATGTCCTCCTACTTCTCCAACGAGGCAATCAGCTCCTCCTGCTCCAGCCCAGCCTCCAGCTTCTCCGCCGCGCTGGGCGCCACGCCGCCCGCTGCGCCGGCGATCAGCCCCGACCCCGCGTCGCAGTTCGACATCTCCGAGTACCTCTACGGCGACGGCCCGTTAGCCGCGCCGCTGGCGCCCGTTGGCGCTGCTGTTGCAAGCTCGGCGACTGCGGTGCCTGCGAGGAGCGCGGCCGAGTCGGCGGCGGCGGTGGAGAGGCCGCGGACGGAGCGCATCGCGTTCCGCACGAGGACGGAGATCGAGATCCTCGACGACGGC…	MAAVGAAPVLYQQQAQAVGDACFFSSMSSYFSNEAISSSCSSPASSFSAALGATPPAAPAISPDPASQFDISEYLYGDGPLAAPLAPVGAAVASSATAVPARSAAESAAAVERPRTERIAFRTRTEIEILDDGYKWRKYGKKSVKNSPNPRNYYRCSTEGCSVKKRVERDRDDPAYVVTTYEGTHSHASPSTVYYASQDAASGRFFVAGTHPPPGSLN
HvWRKY20	HORVU.MOREX.r2.1HG0066270.1	1H:492183968-492184757	IIc	WRKYGKK	651	216	22931.3	6.2	46.67	54.44	-0.407	no	nucleus	ATGGCGATAGTCGGAGCGGCACCAGTGCTCTACCAGCAGCAGGCGCAGGCGGTGGGCGACGGGTGCTACTTCTCTTTCATGTCCTCCTACTTCTCCCACGGGGGAGCCAGCTCCAACGCTTCCAGCACCGCGTCCAGCTTCTCCGCCACGCTCGGCGCCACGCCGTCCGCTGCACCGGCCATCGCCGCCGACCCCGCGATGCAGTTCGACATCTCCGAGTTCCTCTTGGACGAGAGCGGCTTCGCCGCGCCGTTGCCGGACGGCGGCGCCGCCGGTGCAACCGCGGCGATGTCGGCGACCGCTCACACTAGGAGCGCGGCCGAGGTAGAGCGCCCGCGGACGGAGCGCATCGCCTTCCGGACGAGGTCGGAGATCGAGATCCTCGACGACGGCTACAAG…	MAIVGAAPVLYQQQAQAVGDGCYFSFMSSYFSHGGASSNASSTASSFSATLGATPSAAPAIAADPAMQFDISEFLLDESGFAAPLPDGGAAGATAAMSATAHTRSAAEVERPRTERIAFRTRSEIEILDDGYKWRKYGKKSVKNSPNPRNYYRCSTEGCDVKKRVERDRDDPAYVVTTYEGTHSHASPSTIYYASQDAASGRFFVAGTHPPPGSLN
HvWRKY21	HORVU.MOREX.r2.3HG0229370.1	3H:410018869-410019984	III	WRKYGQK	927	308	32700.5	6.54	53.77	55.19	-0.512	no	nucleus	ATGGAGCAGAGGTGCGCCCTGGCCACGGAGCTCGCGCAGGTGCTCGACACGGTGAGGCAGCTGGAGGCGCACATGGGCGTGAAGGGCGGCGCCGACGGAGGGGAGACGTGCCGGGCGCTGGTGTCAAGCATGCGCTCCTCCGTCGACAGGTCCATCCACATCGCCATGTCTTCGTGCTGCGTGGAGGGGCGCGTCCTCGGAGCGCCCGAGTCGCCGCCATCTGCCGACGGCAGCCCCCGCAGCGGCGGCTCTGATCAGGCTGCCGACTCCCCTTGCCGCGGCGCTCATGCAGCCGGGCAGTCCAAGAAGAGGAAAACACTGCCCAAGTGGAGCACGCAGGTGAGGGTGAACTCCGTGGAGGACGTCGGCCCCCTCGACGACGGCTTCAGCTGGAGGAAG…	MEQRCALATELAQVLDTVRQLEAHMGVKGGADGGETCRALVSSMRSSVDRSIHIAMSSCCVEGRVLGAPESPPSADGSPRSGGSDQAADSPCRGAHAAGQSKKRKTLPKWSTQVRVNSVEDVGPLDDGFSWRKYGQKDILGAMYPRAYFRCTHRHTQGCYASKQVQRAHGDPLLFDVVYHGNHTCAQGKHCNSQRPQPAASGEHWQPQPAGGQEQISVGQKTGGGAPGVAAPFSFPSKQAGADTGSDFPAGCAITASPFMSPATPECKVSCRNVPDVELSSTTESPMGEMDFMLQLADADFLDNSRYL
HvWRKY22	HORVU.MOREX.r2.5HG0392720.1	5H:399401234-399402650	III	WRKYGQK	999	332	35888.1	6.16	50.66	62.62	-0.424	no	nucleus	ATGGAGAGCGTGGATGAAAATGGAGGAAGCCGCCTTGTGGTGACCGAGCTGGGCCACATCAAGGAGCTGGTGAGGCAGCTCGGCGTCAACCTGGGAGGCTGTCCCGAGCACTGCAAGCGTCTGGCCGCCCAGATCTTCGATGTAACCGAGAGGTCCATCGGCATGATCATGTCCGGGCACTTCGACTGCCCGAAGCGCTCCGCCGCCGGCCTCGACTCGCCGCCCTTCTCCGCGACTCCCAGCCCCCTGAGCGACGTTTCGGGGATGCCTTTCCATACCAACAACAAGAAGAGGAAGATAATGGAGAAACGGAAGCATCAGGTTAGGGTGAGCTCGGAGGTAGGAGGAGCAGAGACCCCAGTCGATGACGGCCACAGCTGGAGGAAGTACGGCCAGAAG…	MESVDENGGSRLVVTELGHIKELVRQLGVNLGGCPEHCKRLAAQIFDVTERSIGMIMSGHFDCPKRSAAGLDSPPFSATPSPLSDVSGMPFHTNNKKRKIMEKRKHQVRVSSEVGGAETPVDDGHSWRKYGQKDILGAKHPRGYYRCTHRKSQGCAATKQVQRADEDPTLFDVIYHGEHTCIHKTVAALAAGHAEENPGASRLLQNLSTSLTVNTEGLTATAGHQGCSTTTSFCFSSQAARVLAPQEHYPFSMPSTPENCFGQGASLSTSLEPSPVTSDSNRFSMTPFQAEWRARSELDEVVSALVAAGAPAMEETPFSLDGFEFDVSGFFA
HvWRKY23	HORVU.MOREX.r2.7HG0616260.1	7H:616808151-616809448	IIa	WRKYGQK	1179	392	42248.7	9.32	54.21	66.53	-0.492	no	nucleus	ATGTCCCCTCCCCTCCCTTCCTCTATATATTCATGCCCGCGCGCCTCCTCCCACCCACGACCACTTCTCTACCAAGCCGCCCGTACCTTCCCGGTCTTCTTCTTCTTCTTCGACCTCTCCCATCCATTCTTAAGCTACAGCGAATTCTGTAAGAAAGACATGGACGAGCAGTGGATGATGGGGCAGACTTCCCTCAGCCTCGGCCTCAACGTGGGCCGGCCGACGGCGCGGGGAGGGGGTCCTCCGGTGCCGTCCAAGGTGCTCGTGGAGGAGGACTTCATGTCCTCCAAGAAAAGCCACGAGGTCGAGGCGCTGGAGGCGGAGCTCCGGCGTGTGGGCGAGGAGAACAGGAGGCTGGGCGACATGCTCCGCGCGCTGGTGGTAAAGTACTCCGACCTG…	MSPPLPSSIYSCPRASSHPRPLLYQAARTFPVFFFFFDLSHPFLSYSEFCKKDMDEQWMMGQTSLSLGLNVGRPTARGGGPPVPSKVLVEEDFMSSKKSHEVEALEAELRRVGEENRRLGDMLRALVVKYSDLQGKVSGMMAAAAANNHQSLTLTTSEGGSAASPSRKRARSDSLDTAGRNPSPPLAAAATGGFAISVNVGPGRDQAECTSVHEPCNSKRVRADECKASRVSKLYVHADPSDLSLVVKDGYQWRKYGQKVTKDNPCPRAYFRCSFAPSCQVKKKVQRSAEDKTVLVATYEGEHNHAQPPKLQGAGSRKSGGDAAPVRASPAPALVQQQRNQEAPAASVADQVADRKNLAEQMAATLTRDPGFKAALVSALSGRILELSPSNS
HvWRKY24	HORVU.MOREX.r2.5HG0417140.1	5H:517878890-517885116	I	WRKYGQK	5031	1676	188310	7.82	50.3	82.27	-0.473	no	nucleus	ATGGACGCGCCTTCTTCGCCGCCGGGGCTCAAAGTGCGGCGGGAGTCGCACGACATCAAGAAGCCGTCCGGGGCGCCGGAGCAGTCCCAGGCGCAGGGGCATGGCCGGCGGGAGCGACCGCGGATGGACGCGCCTTCTTCGCCGCGGGGGCTGCAGGGCGAGCGACCGCCGCGGATGGACGCGCCTTATTCGCCGCGGGGGCTGCAGGGCCCGCGACCGCCGCGGATGGACGCGCCTTATTCGCCGCGGGGGCTGCAGGGCCCGCGACCGCCGCGGCTCAAAGTGCGGCAGGAGTCGCACGCCATCAAGAAGCCGTCCGGGGCGCCGGAGCAGTCCCAGGCGCAGGGGCATGGCCGGCTGGAGCAGCAGCGACGGCAGGCGGTGCGCATCGACGCCAAT…	MDAPSSPPGLKVRRESHDIKKPSGAPEQSQAQGHGRRERPRMDAPSSPRGLQGERPPRMDAPYSPRGLQGPRPPRMDAPYSPRGLQGPRPPRLKVRQESHAIKKPSGAPEQSQAQGHGRLEQQRRQAVRIDANPSFRELVQYLSGGVPASDSLVHQLVGQGSESQTQDFQIVEAGEWQPSLPSEQLLSAAISPAGRLASTDRSLRPVPTRPPDVIDLTDDRFEDGGLAGIADDDWLSLKGALPSSPPPDSTSGQFLPQGPKSVKQLKQTVSDISHEVHSQVKQACHTKKRTQQIQAPVCAMADAMFRLPEKLDALLASHGQTLPRGAEEEIPLIKQDLEKMVAILQEHDDSGAEDRAMTAKCLAKEVRELSYDMEDSVDQYEQTATTSKWIAPRLKKQK…
HvWRKY26	HORVU.MOREX.r2.1HG0074460.1	1H:510618033-510618797	III	WRKYGQK	765	254	26678.7	5.62	41.29	64.41	-0.333	no	nucleus	ATGGAGGGCACGACGGCGACGCTGGCGTCGGAGCTGGACGGGCTGCTGGCCATGGCGAGGGAGCTGGAAGCGCGCGTCGACGGCGACCAGGGCGCGCCCGGCGCGGCGAGGGAGCTCTGCGCCGAGCTGGCCGCGTCCGTCGACCGGGCCGTGCGCCTCGCCGGGAGCGGAGGCAATGCCGGCGGCAGGGCGTGCGTGAACGGCCGGCTCAGGAGCGGCAGGAATGCGGCGGCAGTGCGGGCGCAGGTCCGGGTGGCGTCGATGCATGACCTCGGCCCCCTCGACGACGGGCTCAGCTGGCGCAAGTACGGCCAGAAGGACATCCTGGGCGCCACGTACCCCAGAGCATACTTCCGGTGCACGCACCGGCACTCGCAGGGCTGCCAGGCCACCAAGCAG…	MEGTTATLASELDGLLAMARELEARVDGDQGAPGAARELCAELAASVDRAVRLAGSGGNAGGRACVNGRLRSGRNAAAVRAQVRVASMHDLGPLDDGLSWRKYGQKDILGATYPRAYFRCTHRHSQGCQATKQVQRAHADPLLFDVVYHGAHTCAQAAAALAGPEHQPPAAFGLEQQQQSSPPAAPQGIQWPAEPMTPPSFPSSPAGCYTPASSWCQLTGGYGYAAGGGLGADMEFDELFWNTPGFFEPEVQNL
HvWRKY27	HORVU.MOREX.r2.1HG0074410.1	1H:510559275-510560036	III	WRKYGQK	762	253	26665.5	5.1	27.77	66.8	-0.411	no	nucleus	ATGGAGGACACGGCGACGGCGGCGACGCTGGCGACGGAGCTGGACGGGTTGCTGGCCATGGCGAGGGAGCTGGAGGCGCGCGTCGACGGCGACCAGGGCGCGCCGGGCGCCGCCAGGGAGCTCTGCGCGGCTCTGGCCGAGTCCGTCGACCGGGCCATGCGCCTCGCCGGCAGCAGCGAGGGCGAGGGCGAGGGCAATGCCACCGGCAGGGCGAGCGTGAGCGGGCAGGTCAGGGGCGGCAGGAAGTCGGCGGCGAACAAGGTGCGGACGCAGGTGCGGGTGGCATCGGTGACGGACGTGGGGCCGCTCAACGACGGGCTCAGCTGGCGCAAGTACGGCCAGAAGGACATCCTCGGCGCAACGTACCCCAGGGCATACTTCCGGTGCACGCACCGGCAC…	MEDTATAATLATELDGLLAMARELEARVDGDQGAPGAARELCAALAESVDRAMRLAGSSEGEGEGNATGRASVSGQVRGGRKSAANKVRTQVRVASVTDVGPLNDGLSWRKYGQKDILGATYPRAYFRCTHRHTQGCQATKQVQRTHADPLLFEVAYHGEHTCVQAAVQQQPPACFGQGQQSPPAVAPEGIQWPVTPPSFPSTQDDHVGDCYPSVCQLDGGYGYGAGGGLGADMGVGSQLDDWFLYLSEVQNL
HvWRKY28	HORVU.MOREX.r2.5HG0392730.1	5H:399761478-399763004	III	WRKYGQK	1041	346	36719.8	5.65	50.11	62.95	-0.396	no	nucleus	ATGGAGGCAGTGGAAGGCAATGGAGGAGGGAGCGGCCTGGTGGTGACGGAGCTGAGCCACATCAAGGAGCTGGTGAAGCAGCTGGACGTGCACCTGGGAGGCTCGCCGGGCCTCTGCAAGCACCTCGCCCAGCAGATCTTCGCCGTCACCGAGAAGTCCATCGGCATCATCAGGTCCGGCCACTTCAACTGCCCCAAGCGCTCGGCCGCCGGCGCCGGCCTCGACTCGCCGCCGCTGTCCGCGACGCCCAGCCCCGTCAGCGGCGTCTCCAACACGCCGTTCAAGCCCAACAAGAAGAGGAAGACGTCGGAGAAAGGGCGGCATCAGATCAGGGTGAGCTCGGCGGGAGGAGGAGCGGACGCCCCGGCCGACGACGGCCACAGCTGGAGGAAGTACGGC…	MEAVEGNGGGSGLVVTELSHIKELVKQLDVHLGGSPGLCKHLAQQIFAVTEKSIGIIRSGHFNCPKRSAAGAGLDSPPLSATPSPVSGVSNTPFKPNKKRKTSEKGRHQIRVSSAGGGADAPADDGHSWRKYGQKDILGAHHPRAYYRCTYQKTQGCAATKQVQRADEDPALFDVIYHGEHTCLHKTAAAMVQPDGQNQDAQSLLQNLSSSLTVKTEGLIAAGTQGWSTTTPFSFSSPAVSGMTPPEHHPFSAPSTPENCFVSMPTSLEPSPATSGSNHMCFNPFQAQSELQTMVSALVEATSMPPADTEEAGFAYWSFDDSALDVNSFDEDVTNFDISAFLASDV
HvWRKY29	HORVU.MOREX.r2.1HG0074430.1	1H:510591111-510591854	III	WRKYGQK	744	247	25790	5.83	42.48	72.11	-0.205	no	nucleus	ATGGAGGACGCGGCGGCCACGCTGGCGACGGAGCTAGACGGGCTGCTGGCCATGGCGAGGGAGCTGGAGGCGCGCGTCGACGGCGACCAGGGCGCGCCCGGCGCCGCCAGGGAGCTCTGCTCCGCGCTGGCCGCGTCCGTCGACCGGGCCGTGCGCCTCGCCGGCCGTGGCCGCAATGCCGGCGCCAGGGCGGGCGTGAACGGCCAGCTCAGGAGCGGCAGGAAGGCGGCAGCGGCGAAGGTGCGCACGCAGGTGCGGGTGGCCTCAATGCAGGACCTCGGGCCACTCGACGACGGGATGAGCTGGAGGAAGTACGGCCAGAAGGGCATCCTCGGCGCCACGTACCCGAGGTCCTACTTCCGGTGCACGCACCGGCACACGCAGGGCTGCGCCGCCACC…	MEDAAATLATELDGLLAMARELEARVDGDQGAPGAARELCSALAASVDRAVRLAGRGRNAGARAGVNGQLRSGRKAAAAKVRTQVRVASMQDLGPLDDGMSWRKYGQKGILGATYPRSYFRCTHRHTQGCAATKQVQRATADPLLFDVVYVGAHTCAGAAVLGGTEQQLPPPAAFGQEQQSPPAAAPEGVQLPAEPVTPFSFPSSPASSWCQLTGSYGYAAPGGGLGVDMELEGQLDELFLHMSEFF
HvWRKY30	HORVU.MOREX.r2.2HG0101740.1	2H:88530287-88531306	III	WRKYGQK	903	300	32012.5	6.1	45.72	64.07	-0.427	no	nucleus	ATGGAGAGCGTGGAGGGAAACGGCACCGGCCGCGGGAACCTGCAGCTCGTGGTGTCGGAGCTGTGCCGCATCCAGGAGCTGGTGCGGCAGCTGGAGCTGCACCTGCACGCGCCGGACACCTCCGTCGACCTATGCCGCGCCCTCACCGCTCAGATCTTCGCGCTCACCGACAGGTCCATCGGCTTCGTCGCCGCCGCACATTCCTCCGACGCCCCGACGACGCCCTCCAGCACGTCCAGCTCCCTCAGCGGCGTCTCCGACCAGCCTTTCAGGACCAACACCAAGAAGAGGAAGGCGACGGCGAGGTGGACGAGCCAGGTGAGGGTGAGTGCGGCCGGCGGCGCGGAGGGGCCTGTCGACGACGGCCACAGCTGGAGGAAGTACGGGCAGAAGGACATC…	MESVEGNGTGRGNLQLVVSELCRIQELVRQLELHLHAPDTSVDLCRALTAQIFALTDRSIGFVAAAHSSDAPTTPSSTSSSLSGVSDQPFRTNTKKRKATARWTSQVRVSAAGGAEGPVDDGHSWRKYGQKDILGAKHPRAYYRCTHRNSQGCTATKQVQRADEDPVLFDVVYHGQHTCRPTGGGGGGRRPPTNQHNPHAESLLQSLRAGLAVDADHGGLNTSVCVSPPMTSPSMASPVASGSNGGPTMSPYPAGAYTEWPLDGDLQEVVSVFTAVSAPSMDYLFEFDPTFDVDAPNFFM
HvWRKY31	HORVU.MOREX.r2.1HG0057170.1	1H:456929694-456930740	III	WRKYGQK	930	309	32672.9	5.21	56.22	56.63	-0.545	no	nucleus	ATGGCGGCACTTGTCACTCCCGGTCCCGGAGGTTGTTCCACTGTGTCCGAGCTGGTCGGGCAGGGCCGGGACTCGGCCGCCGTTCTCGAGGCCCTGCTCCGGGGCGCGTCGTCCCCGGACCACGCCGGGATCCGGGAGCTCGCCGCGGAGATCCTCCGCTGCTGCGACCGCGCGCTCGCCGCGCTCCACGGCGGCGACGGCGCCGTGGTCGACGTTGCCGGCGGCAGGAAGCGCAAGCCGGGACCCGGCGGCCCAGACAACCAGACGAGGCCGAAACGAAGGATGCGCGCGAGCAGCGGAGAGAAGGCGGCGAGAGTCGAGAGGAGGCGGACGGCGGAGGACGGGCTCATATGGAGGAAGTACGGCCAGAAGGAGATCCACAACAGCACGCACCCGAGG…	MAALVTPGPGGCSTVSELVGQGRDSAAVLEALLRGASSPDHAGIRELAAEILRCCDRALAALHGGDGAVVDVAGGRKRKPGPGGPDNQTRPKRRMRASSGEKAARVERRRTAEDGLIWRKYGQKEIHNSTHPRLYFRCTYKHDSGCPATRQVQQSEDDPSLYVITYFGDHTCCQGDAAGAGLDGDDVKMQPFVINFGSATPSGGSPWLSSSNNTNDGRRSESGTSHSSQAVCSPEEFGVKEAKVESTSESGSQPADPAAAADLSSSADFSCASPAWDPLSGCLGWEHFGDSPFDCDTEFMDFDAIPLFQ
HvWRKY32	HORVU.MOREX.r2.2HG0166600.1	2H:634004282-634005453	III	WRKYGQK	879	292	31144.7	6.86	38.95	65.99	-0.506	no	nucleus	ATGGCCATGGCGCCGTACGAGCAGGTGGTGGACGACCTGGCCAAGGGGCAGGAGTTCGCGACGCAGCTGCAGGGCCTCCTCCGGGACTCCCCCAAGGCCGGCCTCATCATGGACCAGATCCTCCACACCTTCTCCCGCGCCATCCACGCCGCCAAGGCCGCGGCCGCCGCCAGCGCCAGCGCCAGCAGCGGGAGCGAGGTCACCGACGGCGCAACCAGCGGCGGGAAGAGGAAGTCCGCCGCCGGTGGAGGGCCGCGCAAGGCCTGCCGGACGAGGACCCATGATTCGTCCGTGGTCACCAAGAAGATGAAGAGCTTGGAGGACGGGCAGACATGGCGCAAGTACGGGCAGAAGGAGATACAGAACTCCAAGCACTCCAAGGCCTACTTCCGGTGCACG…	MAMAPYEQVVDDLAKGQEFATQLQGLLRDSPKAGLIMDQILHTFSRAIHAAKAAAAASASASSGSEVTDGATSGGKRKSAAGGGPRKACRTRTHDSSVVTKKMKSLEDGQTWRKYGQKEIQNSKHSKAYFRCTHKYDQQCPARRQAQRCDEDPDTYRVTYIGVHTCQDPAAAVAPHAPHLTGGCHLISFAPAAAHVLPTTSTTTTNTNLVDQDAAARGSGLRLPGLKLEGGDLEEVLSSRTPGSSALHGAATWPDQGDVTSTLQYGLGQGDLFLDGYTYLEDFMPLPYGLDH
HvWRKY33	HORVU.MOREX.r2.4HG0316370.1	4H:420600506-420601522	III	WRKYGEK	621	206	22908.4	8.38	64.01	49.37	-0.788	no	nucleus	ATGTCTCCCGTGCCGAGCCCCAATCAATCACACCTTCTAGGCCACGGATCAAGGAAAGAGAAGCGCATGAGGAAGGTGGATACCTTTGCGCCGCACAACGACGGCCACCAATGGAGGAAGTACGGCGAGAAGAAGATCAACAACTGCAACTTTCCCAGGTACTACTACAGATGCACCTACAAAGACAACATGAACTGCCCGGCCACCAAGCAGATTCAGCAGAAAGATCACAGCGACCCCCCATTGTACCAAGTCACATACTACAATGAGCACTCGTGCAACAGCGCCTTCCTTGCCCTCACCCCCACAGAGTTCCAGCTGCAGACCGCATCTGGAAAGGCGGTCTCCATCTGCTTCGATTCATCTGGTGCTCAGGAGCCGGGAGCCAATGCCAGCTCG…	MSPVPSPNQSHLLGHGSRKEKRMRKVDTFAPHNDGHQWRKYGEKKINNCNFPRYYYRCTYKDNMNCPATKQIQQKDHSDPPLYQVTYYNEHSCNSAFLALTPTEFQLQTASGKAVSICFDSSGAQEPGANASSPSSSAAPRSAPSENKNKPLALRSEALSSWGPGVVEQKTACADIQSCSTECQDAYISEDIDAGRFGSIRFFHFL
HvWRKY34	HORVU.MOREX.r2.4HG0294290.1	4H:119851755-119854536	III	WRKYGEK	672	223	24618	7.68	60.05	44.71	-0.807	no	nucleus	ATGGCCCTGGACTCCGTCCCGTCCTACCCCAGCGACCTGGGATCCAGCAGCAGTAGGACAACCAGGACCCAGCAAAGAATCCGGAAGGAGGAGCGGACGTGGACGGCGGACACCTACGCACCGTACGACGACGGGCACCAGTGGAGGAAGTACGGCGAGAAGAAGCTCTCCAACTCCAACTTCCCGAGGTTCTACTACAGATGTACCTACAAGACTGACCTGAAGTGCCCTGCGACAAAACAAGTCCAGCAGAAGGACATGAGCGACCCACCATTGTTCACAGTCACTTACTTCAACCATCACAGCTGCAACACCACCTCGAGGCCCATCGGCAGCGCCCCAGACACCACCGAGCAGTCGTCCTCGAGGAGGGCGGTGTCCATCTGCTTCGGGTCGCAT…	MALDSVPSYPSDLGSSSSRTTRTQQRIRKEERTWTADTYAPYDDGHQWRKYGEKKLSNSNFPRFYYRCTYKTDLKCPATKQVQQKDMSDPPLFTVTYFNHHSCNTTSRPIGSAPDTTEQSSSRRAVSICFGSHATGEQPTFLTSPGTLQSPASTTNQQSDIGAYGHQFQWTDTSPSADDAPVKMETDSLAGTGASSGGASGHALSRTLLPIGQSRCIEYFHFL
HvWRKY35/41	HORVU.MOREX.r2.2HG0106180.1	2H:118703868-118707558	I	WRKYGQK	1278	425	46234.4	5.68	42.68	66.82	-0.679	no	nucleus	ATGGCGGCCGGCCAGTGGTCGGCCATCGGCGACGGCGGCGGCCTCTGGTCCCCGCAGGCGCTCGAGAGCCTCTTCCCCGACGAGCAGCCGGCGGCGGCGCAGCTGGGCTTCTTCGGGGGGTCCCTCGCGCAGCTCGCTCCCCCTCCGCCGCTCTGCGCCATCGCGCTCCTCGGGTACCCCCAGGATAACTTTGATGTGTTCAATGAACAAGACCTAGCACAGGTGGCAGCACAGGTAGCTCAAAAGAAGGAGTTGCAGGAAAAACAAGCGGCGTTATTACATCCGAAGGGTATGTCGACTTTGCCATCACATACTGGTAGTGGTAGTATGAACACTGGACCAACTGGAATTCTACAAGTGCTCCAAGGTTCATCCACCACTCTGGACAGTATCAACACT…	MAAGQWSAIGDGGGLWSPQALESLFPDEQPAAAQLGFFGGSLAQLAPPPPLCAIALLGYPQDNFDVFNEQDLAQVAAQVAQKKELQEKQAALLHPKGMSTLPSHTGSGSMNTGPTGILQVLQGSSTTLDSINTGSAGFLEALQGSSITLDKPADDGYNWRKYGQKAVKGGKCPRSYYKCTLNCPVRKNVEHSADGRIIKIVYRGQHCHEPPSKRFKDCGDLLNELDELNDAEEPSTRSLLGCQGYYGKPKPITPNGTMVDGLLPTKEEGDEQLSSLSDIREDDGEIRTVDGDVGDADANERNAPGQKIIVSTTSDVDLLDDGYRWRKYGQKVVRGNPHPRSYYKCTYQGCDVKKHVERSSQEPHAVITTYEGKHTHDVPESRNRSQATGSHHCKEQTYS…
HvWRKY36	HORVU.MOREX.r2.3HG0252360.1	3H:557233333-557236046	IIc	WRKYGQK	987	328	35184	6.18	50.43	63.75	-0.615	no	nucleus	ATGGCCAATCAATCCCTTCACAAGTGTGGGCTCCTCGTCCAGGAACAAGAGATGGGAGATGCACTCAGGGATCACGACCTCGCAGCCACCGCCGACGACGAGGACGCTGGCGTTTGGCCCGGTGAGCTCGACGAGCAGCTCATACGGGAGCTCCTCAGCGATGACAGCCTCCTCGGCTCCATGTATCCGGACAACGACTCGGGGCGCCACCGCTCCTGCGACACGGGAGGCGCCCCTGCCGCCACGCCGTGCAACAGCGGCGGCAGCACCGCGGCCGAGCACGAGCCGTTGCCGCCGGCTTCGGCGTCGAGTATGCCTCTGTGCTCGGCCTACTCCGGCCCTACGATCAGGGACATCGAGAAGGCGCTGTGGTCTCGGCCGTACACCTCCAGCCAGCGC…	MANQSLHKCGLLVQEQEMGDALRDHDLAATADDEDAGVWPGELDEQLIRELLSDDSLLGSMYPDNDSGRHRSCDTGGAPAATPCNSGGSTAAEHEPLPPASASSMPLCSAYSGPTIRDIEKALWSRPYTSSQRYGSLHFRRYGAPGTAPESRHVTKVRSCGGGKKTPMDGYRWRKYGQKFIKNNPHPRSYYKCTSARCSAKKHVEKSTDDPEMLIVTYEGSHLHGPQTTTLRRFQPPDAAADLPGAAGVAIAGAGIGCSVRPSYGTSSGDDVRREDNQPLHRGAVQRVATDTPSSSLPHVAAVDATVLSSSSLDSPWSLEALLPVERI
HvWRKY37	HORVU.MOREX.r2.3HG0197030.1	3H:52088588-52090503	IIb	WRKYGQK	1485	494	51428.5	7.65	49.16	65.18	-0.393	no	nucleus	ATGGACGTCGGCGTCGAGAGGCCGCCGCCGGTGAAGGAGGAGAACAAGCCGGACACCATGCAGATCGGAAGCGCGCTTCCAATGGTCCTTGAGAGTTTCCCATCCACGCAAAGAAATTCCATCGCCACCAGCAAGGACGACAAGCTGGAGGCGACCAAGGCGGAGATGGGCGAGGTGAGGGAGGAGAACGAGCGCCTCAAGACGCTGCTCTCCCACATCGTCAGGGACTACCAGTCGCTCCAGACGCACTTCCACGACGCCGTCAAGGTCAAGCAGCAGGCACCGGCCGCCGACAAGCTCCCTGCCGCCTCCACGCCGGCGCCCACCGCCGACGACCTCGTCTCCCTGAGCCTCGGCAGCGGCGGCTATTCCCGTCCCAAGGGCGCCCACCAGAGATCG…	MDVGVERPPPVKEENKPDTMQIGSALPMVLESFPSTQRNSIATSKDDKLEATKAEMGEVREENERLKTLLSHIVRDYQSLQTHFHDAVKVKQQAPAADKLPAASTPAPTADDLVSLSLGSGGYSRPKGAHQRSLSSSSSGTETDPDDQLSLGLSSRRSTDGDDRQAARPSATPLMNLSSDSSADDTAAPGHDLPAAACPTATKARKSPGAGVDGADDEVLQQQAKKARVSVRVKCDTPTMNDGCQWRKYGQKISKGNPCPRAYYRCTVAPSCPVRKQVQRCADDMSILITTYEGTHSHPLPPAAAAMASTTSAAASMLLAGSSSSSSHGHHLPFASAGLLGPTTISTIASCPTVTLDLTAPHSLMQQQYQSPYAAAMAAGYESKALPAAWSSGYLAPYG…
HvWRKY39	HORVU.MOREX.r2.3HG0239890.1	3H:492656564-492657683	IIe	WRKYGQK	846	281	30682.9	5.15	76.46	48.33	-0.911	no	nucleus	ATGTCGGACTGCAGCACCGGCACGGACTCGCCGCGGGCGGACTCCGTCGACGAGCAGCCGCCCGCCGACGCCGAGTCGCCCGGCGGAGGCCAGAGCAAGCGCGACCACCCCTCGCCGTCGTCCCCGCTCCCGCCGCCAAAGCGCAGCCGGAGATCTGTGGAGAAGAGGGTGGTGTCGGTGCCGATTGCCGAGTGCGGCGAGCGGGCCAAGACCAACGGCGAGGGCCCGCCGCCGCCGGACTCGTGGGCGTGGCGCAAGTACGGCCAGAAGCCCATCAAGGGATCCCCCTACCCGCGGGGGTACTACCGCTGCAGCAGCTCCAAGGGGTGCCCGGCGAGGAAGCAGGTGGAGCGCAGCCGCACCGACCCCACCGTGCTGCTCGTCACCTACTCCTACGAT…	MSDCSTGTDSPRADSVDEQPPADAESPGGGQSKRDHPSPSSPLPPPKRSRRSVEKRVVSVPIAECGERAKTNGEGPPPPDSWAWRKYGQKPIKGSPYPRGYYRCSSSKGCPARKQVERSRTDPTVLLVTYSYDHNHPWPAPKAGCHPTKSSSHRLVDPKPEPGTPVDCQPEHGPEAPEQGQEEEHEQKPVIGLADAAAITPVTAAAEEEEESFDFGWFEQYPTWPRTALYVPAFDVAPPEDWERELQGEDALFAGLGELPECAIVFGRRRELALPATAPCS
HvWRKY40	HORVU.MOREX.r2.5HG0386470.1	5H:343041791-343043928	I	WRKYGQK	1005	334	36662.9	9.01	52.03	53.14	-0.673	no	nucleus	ATGCAAAGTCAAGAGAAGATAACACCTGTGAAGCCTGTAGCCTCCAGGCCTTTCTCCAGTTTCACTTCCTTCTCGAAGCTCTTGGAAGACTTCACTGGGACTGGTTCTGCGCAGATCACCTCTCTAGGAGAGACTGTTATAGTTAGGCGGCCGAAGGTAACACGTTTCGCACCGCCACCAAGTGATCTATCTGCAGGAATCGCTGCAACCATGTTCCAGGATGCTGGTTTAGATACCACACGTGAACAAATGGTCATCGATCCAGAACAAGTAGTCTCCTGTGACCAGATGACGGCATTCCACAATATCAACAAGCCAATTCATAGTATGAAAAACCGTTTGTCCTATGATGGCTACAATTGGAGGAAGTATGGGCAGAAACAAGTGAAAGGGAGCGAG…	MQSQEKITPVKPVASRPFSSFTSFSKLLEDFTGTGSAQITSLGETVIVRRPKVTRFAPPPSDLSAGIAATMFQDAGLDTTREQMVIDPEQVVSCDQMTAFHNINKPIHSMKNRLSYDGYNWRKYGQKQVKGSEFPRSYYKCTHPTCPVKRKVETTVDGQIAEIVYNGEHNHPQPHPPKKPTSSASTEVLVPGAHGSNDAGAESQVGGCNLVLGSAPVATAFRSSCDCVDEFGNTSPVYHCNTSRKEKQSSITNGLTSSSEAAPAFQSPTECESSRDAAFRWRKYGQKAVNGNSFPRSYYRCSTARCNARKFVERSSDNSLVTTYEGKHNHAQLK
HvWRKY42	HORVU.MOREX.r2.5HG0405940.1	5H:482563780-482566651	I	WRKYGQK	2031	676	73309.9	6.11	58.97	48.37	-0.804	no	nucleus	ATGGCCGGCACCAGCGACCGTGGATCCCTCATGGAGGACTGGATGGCCATGCCCCCGACGCCCAGCCCGAGAACGCTCATGTCAAGCTTCTTGAACGAGGACTTCAGCTCTGGTCAATTCTCCAATTTTTTCGGCGAACATGTGAGCAACAAGCCCCATGATCAATCAGAGAAGAGAGGAGAGCTTGTGGATTTGAGGGAGCAAGTGCCTGCTCAGCCACCTACAGCTATGCCCCAAAAGGATTTTTCCCTGCAACCAAATTCGTTCAATGCTAATCAGAAATCAAACCCACAGGGATCTCTAGCTGAGCGCAGGGCTTCGAGGGCTGGTTTCAGTATCCCCAAGATCGATACATCTCGTGTGGGTTCGTCCACAGTTATTCGATCACCCATAGCAATT…	MAGTSDRGSLMEDWMAMPPTPSPRTLMSSFLNEDFSSGQFSNFFGEHVSNKPHDQSEKRGELVDLREQVPAQPPTAMPQKDFSLQPNSFNANQKSNPQGSLAERRASRAGFSIPKIDTSRVGSSTVIRSPIAIPPGLSPTTLLESPVFLYNSMAQPSPTTGKLFVASAANSTMPPDSTFSNDVFSFQPHSGPTSYSNVEKGYNVCHQNQSMSNMHQQGSSLQSSFTAVKDSADEAIVKPKTSDSMFSDNHTSEEQEENEEDQNEEYSSATNSNPGEDGYNWRKYGQKQVKSSEHPRSYYKCTHPDCPVKKKVERSQDGQITEIVYKSSHNHPLPPPNRRSGIPSSQINDPQVHVLERPGLHAGLNTASLWENGKSECIQDAQGVEGRSAACPPVSAYGD…
HvWRKY43	HORVU.MOREX.r2.1HG0057680.1	1H:459292191-459294505	I	WRKYGQK	1539	512	55495.6	5.33	58.54	41.6	-0.82	no	nucleus	ATGGCCATGACGCCGCCGTCCTCCTTCCCGCCGGCGTCCCCGTCGTCGTACTTCAACATGTCCTCCGGGTTCCTCGACTCGCCGGTCCTCCTCACCCCCAGCTTGTTCGCGTCGCCGACGACGGGCGCATTCCCCTCGCATCAGTTCAACTGGATGGGGACGCCGGAGAACGAGGGCCTGCAGGGAAGCACCACCAACCAGGACGAGCAGCAGCAGTACTCCGGCTTCACGTTCCAGACGACGGCGCCGCCGCCGGTGGCCACCACGACCGCGTCCTCCTTCCTGCAGTCGTCCATGCCCATGGCTCAACTGGTGGGAGACTCGTACCCGCAGCAACAACCGTGGAGCTACGAAGACACGGGCATGAACGGGAGCACGAGACCGGCAGAGTTCACCACG…	MAMTPPSSFPPASPSSYFNMSSGFLDSPVLLTPSLFASPTTGAFPSHQFNWMGTPENEGLQGSTTNQDEQQQYSGFTFQTTAPPPVATTTASSFLQSSMPMAQLVGDSYPQQQPWSYEDTGMNGSTRPAEFTTQFEPPTTSTIMATTAPDVLGNGAYSVPVSSGTAAYRVQSRRPSSDDGYNWRKYGQKQMKGSENPRSYYKCSFAGCPTKKKVEQAPDGQVTEIVYKGTHNHPKPQNPRRGSGSAASSSYALQYQGSNDVSSDALSGTPENSSASYGEDETNGVSSRLAGAVSGGEDQFDSEEPDSKRWRNDGDGEGTIMAVGNRTVREPRVVVQTMSDIDILDDGYRWRKYGQKVVKGNPNPRSYYKCTTPNCPVRKHVERASQDLRAVVTTYEGKH…
HvWRKY44	HORVU.MOREX.r2.7HG0589300.1	7H:466714434-466715617	IIe	WRKYGQK	1074	357	37827.1	5.37	61.3	51.48	-0.686	no	nucleus	ATGGAGGGGGACGCCGGGTGCTACTACCTCGGCGGCGGCTGCAACGACTGGGACCTCAACGCCGTCGTTCGCTACGCCTGCCGCGGCCGTGTCCCGCCGCCGCCCCCCTCGGACGACCCCTTCTCCTCCTTCCTCCCCCCGCCGGTGCCCGCGGTGGAAGACCACGGGATGCCCCACGCCGCGGATCCGCCCGTCAACGGGAACGGGGTCTCTGATGCCGTCGACGAGCTCTCCATTGCCTTCTTCGCACCGTCGTCAACGGGGACTCTGCTGCCAACCTCGCCTCAGCCGCCGCCGCTGCAGCAGCAGCCAGCGGCGCCAACGAACCAAGAAATGGTGCCGATGCAACAAGACGAGCCGGTGCCGCCTCCGGTGCTGCAGGCCGCGGGCGTGCAAGGC…	MEGDAGCYYLGGGCNDWDLNAVVRYACRGRVPPPPPSDDPFSSFLPPPVPAVEDHGMPHAADPPVNGNGVSDAVDELSIAFFAPSSTGTLLPTSPQPPPLQQQPAAPTNQEMVPMQQDEPVPPPVLQAAGVQGPVGEGSRSKRKKKVVKKVVKRVAADGTSADPWAWRKYGQKPIKGSPYPRGYYRCSTDKACEARKMVERCRDDPNSFILTYTGGEHSHPAPAHRNSLAGTTRNRQAPDPAPRHQGAPAAKATGESSSAAAAPEPSPGQSTSGGMSPTTPLRTPSMEEEYNQEEELDEAAGGASRPSKDAEMARETEMNKLLDACVHPRDDAGIFVEETFVVTPWATALGGAAGWS
HvWRKY45	HORVU.MOREX.r2.3HG0237940.1	3H:478191163-478192247	IIe	WRKYGQK	894	297	31286.6	5.14	55.95	57.54	-0.562	no	nucleus	ATGGACGGCGAGTGGAGCGACGGGGCGGCGTCCGGCGGCGAGCAGAAGGCCAGCGGGGATGGCGTTTCGGCGGACTGCAACAGCCCGGGGTCGCCTTCGCCACCGGCGGTGCCGTCGACTAGCGGGAGGAGGCGGTCGTTGCAGAAGCGGGTGGTGACCGTGCCCCTCGCCGACTTGAACGTCCCGCGGCCCAAGGGCGTCGGCGAGGGCAACACGCCGACGGACTCGTGGGCGTGGCGGAAATACGGCCAGAAGCCCATCAAGGGCTCGCCCTTCCCAAGGGCTTACTACAGATGCAGTAGCTCCAAGGGTTGCCCGGCGAGGAAGCAGGTGGAGAGGAGCCAGGCCGACCCGGACACAGTGCTCATCACCTACTCCTACGAGCACAACCACTCCAGC…	MDGEWSDGAASGGEQKASGDGVSADCNSPGSPSPPAVPSTSGRRRSLQKRVVTVPLADLNVPRPKGVGEGNTPTDSWAWRKYGQKPIKGSPFPRAYYRCSSSKGCPARKQVERSQADPDTVLITYSYEHNHSSTAARVQSRPTPKPGKLERPLPSPEPAKSDDTDTHHGTANVAGGLVTESPAAPAIEVHDDFRWLYDVVSVTSSTSPSQVEAADDMLLYGPMFFGKAAVDTAALLPDEFGGEAVCREGSEEDDAMFAGLGELPECAIVFRRHAGDGLSAMAGGVKVEQPAEGTAMT
HvWRKY46	HORVU.MOREX.r2.2HG0107970.1	2H:136445896-136453225	I	WRKYGQK	1848	615	66395.6	6.48	53.83	52.07	-0.823	no	nucleus	ATGGCCGATTCGCCGAACCCTAGCTCCGGGGACCTCCCCTCGCCCGCCGGGAGCTCGCCCGAGAAGCCCTACCCCGCGGATCGACGCGTCGCGGCGCTCGCCGGCGCGGGCGCGAGGTACAAGGCCATGTCCCCCGCGCGGCTGCCGATCTCGCGCGAGTCCTGCCTCACCATCCCCGCCGGCTTCAGCCCCTCAGCGCTCCTCGACTCCCCCGTGCTCCTCACCAACTTCAAGGTTGAACCTTCACCAACAACTGGTAGTCTGGGCATGGCTGCGATTCTGCACAAGAGCGCTCATCCAGACATGCTGCCTTCGCCACGGGATAAATCTGTTCGTAATGCCCATGAAGATAGGGGTTCTAGGGATTTTGAATTCAAGCCTCATCTGAATTCGTCTTCT…	MADSPNPSSGDLPSPAGSSPEKPYPADRRVAALAGAGARYKAMSPARLPISRESCLTIPAGFSPSALLDSPVLLTNFKVEPSPTTGSLGMAAILHKSAHPDMLPSPRDKSVRNAHEDRGSRDFEFKPHLNSSSQSLAPAMSDLKKHEHSMQNQSMNPSSSSSNMVNENRPPCSRESSLTVNVSAQNQPVGMVGLTDSMPAEVGTSEPQQMNSSDNAMQEPQSENVADKSADDGYNWRKYGQKHVKGSENPRSYYKCTHPNCEVKKLLERAVDGLITEVVYKGRHNHPKPQPNRRLAGGAVPSNQGEERYDGASAADDKSSNALSNLANPVHSPGMVEPVPASVSDDDIDAGGGRPYPGDDATEEEDLESKRRKMESAGIDAALMGKPNREPRVVVQTVS…
HvWRKY47	HORVU.MOREX.r2.3HG0209060.1	3H:161101215-161103548	IIb	WRKYGQK	1710	569	59653.3	6.61	49.26	58.15	-0.577	no	nucleus	ATGGACAAGGGCCACCTCGGTGGTGGCGGAGGAGGAGGAGGGCTGCTCGCTCTGGACGCGTCGCCGCGGCAGCTTGGCTTCTTGAACTTGCTTTCGCCGGCGCCGTTCCTCAGGAACATGGAGGCGGACGACGGCGGTGGCGGCGGCAGGGGCAGGAGGTCTATCGAGGTTGACTTCTTCTCCGACGAGAAGAAGAACATGAAGAAGAGCCGGGCTTCGGCCGGTGCCGACGCGGACGACCAGAAGGATCAGGCCTCCGCCGCCGGACTCGCCATCAAGAAGGAGGACCTCACCATTAACCTCCTTTCCGGGAACAACACGAGGCGCGACCGGTCCATGGTAGTCGACGACGACGGGGCGTCCCGGGCCGATGAGGACAGTAACGGCAGGAACACCGGC…	MDKGHLGGGGGGGGLLALDASPRQLGFLNLLSPAPFLRNMEADDGGGGGRGRRSIEVDFFSDEKKNMKKSRASAGADADDQKDQASAAGLAIKKEDLTINLLSGNNTRRDRSMVVDDDGASRADEDSNGRNTGELAAMQAELSRMNDENQRLRGMLTQVNNSYHALQMHLVTLMQQRTQMPPAQPQQPPTHEEGKNESAIVPRQFLGLGPSGASAEVAEEPSNSSTEVGSPRRSSSNGNEDPERGDNPDGPSTAGWLPGRGMTQQQQLGAAAKGHDQQAQEATMRKARVSVRARSEAPIIADGCQWRKYGQKMAKGNPCPRAYYRCTMATGCPVRKQVQRCAEDRTILITTYEGTHNHPLPPAAMAMASTTSAAASMLLSGSMPSADGAGLMSSNFLAR…
HvWRKY48	HORVU.MOREX.r2.4HG0277700.1	4H:5251733-5252629	IIc	WKKYGQK	387	128	13957.2	8.93	51.42	36.64	-1.139	no	nucleus	ATGGCCACAGCAGGGAGCGGTCATGGCGACGAGCAGGTTCAGCGGCAGGCGACTTGGCCGGAGGAGGCAGACGGCGGTAGCCAGCCGCTGGTGATGCCGGAGGACGGGTACCAGTGGAAGAAGTACGGCCAGAAGTTCATCAAGAACATCCAGAAAATCAGGAGCTACTTCCGGTGCCGCGACAGGCGGTGCGGCGCCAAGAAGAAGGTGGAGTGGCAGCCGGGCGACCCCAGCCTCCGCGTCGTCTACGACGGCGCGCACCAGCACGGCTCCCCGTCGTCGTCGTCGTCGCACGGCGGCGGCGGCGGCCAGGACGGCGACGGCAACCGGTACGAGCTCAGCGCCCAGTACTTCGGCGGCGGGGCTCCCACGCCACAGGCGCGGTGA	MATAGSGHGDEQVQRQATWPEEADGGSQPLVMPEDGYQWKKYGQKFIKNIQKIRSYFRCRDRRCGAKKKVEWQPGDPSLRVVYDGAHQHGSPSSSSSHGGGGGQDGDGNRYELSAQYFGGGAPTPQAR
HvWRKY49/72	HORVU.MOREX.r2.3HG0247830.1	3H:536883576-536885483	III	WRKYGQK	891	296	31392	6.55	48.42	63.75	-0.449	no	nucleus	ATGCAGGCGCAGTCCCGTCTCATCATGAACCCCAACGTCGGCGTCGCCGGCTACGACGACTCCGCGGCGGCCGACGAGCAGCACAAGGCGGTGCTGAGGGAGCTGACGCACGGGCACGAGCTGACGGCGCACCTGCAGGCGGAGGCGCTGCGGGCGCTGCGCGGGCAGGGCCAGGCCGAGGCCACCGCCGCATTGATCCTGCAGGAGGTGTCCCGCGCCTTCTCCGTCTGCATCTCCATCATGGGCGGCTCCGCCCCGGCCGCGCCGCCGCCCGACGCGACCCCCGTCGTTGCCACCGGCGCCGCGAGCGCGCGCCGTCCTAGAGACGACGGCGTCCCGAGAAAGGTAACAGTGACTTCCTCGCCATACTCCGACGGGTACCAGTGGAGGAAGTACGGC…	MQAQSRLIMNPNVGVAGYDDSAAADEQHKAVLRELTHGHELTAHLQAEALRALRGQGQAEATAALILQEVSRAFSVCISIMGGSAPAAPPPDATPVVATGAASARRPRDDGVPRKVTVTSSPYSDGYQWRKYGQKRIMRTSFPRCYYRCCYHRERSCPATKLVQQQQPHGDGDQTMYNVIYVHEHTCDHAAPAEPAARGSAPAPLGFAAGQQRGGVGLDRGSMEELERQALVSSLACVLQGRHQSYSGSGAGTPDGSPSQGRAGDVGLDVMDYDMTGTLYFAASSSYGPGGDGMIP
HvWRKY50	HORVU.MOREX.r2.3HG0254080.1	3H:563867952-563870091	I	WRKYGQK	1677	558	59164.3	6.24	56.52	40.72	-0.8	no	nucleus	ATGACCACCTCGTCGTCAGGGAGCGTGGAGACGTCTGCCAACTCGAGGCCGGGCTCCTTCTCCTTCGGCAGCGCGAGCTTCACGGAAATGCTGGGCGGCTCCGCCGCGGCCGGCGGCGCGTCCGGGTACAAGGCCCTGACCCCGCCTTCGCTGCCGCTCTCGCCTTCGCTCATGTCGCCGTCGTCCTTCTTCAGCATGCCCGCCGGCATGAACCTGGCCGACTTCCTCGACTCGCCGGTGCTCCTCACCTCCAGTATCTTCCCCTCACCCACGACGGGCGCGTTCGGGACGCAGTTCAACTGGCGGCCGGAGGCGCCGGCGCCGGGCGCCGCCGAGCAGGGTGCCAACAAGGAGGAGCAGAGGCAGCCGTACTCCGACTTCTCGTTCCAGACGGCGCCT…	MTTSSSGSVETSANSRPGSFSFGSASFTEMLGGSAAAGGASGYKALTPPSLPLSPSLMSPSSFFSMPAGMNLADFLDSPVLLTSSIFPSPTTGAFGTQFNWRPEAPAPGAAEQGANKEEQRQPYSDFSFQTAPANSDEAARATTTSFQQPPVPVASQGEEAYTGQQPQQQAWGYGQQAAGANPASFSAPALPATSSETAPAGVYRQTHSQRRSSDDGYNWRKYGQKQVKGSENPRSYYKCTFPNCPTKKKVETSLEGQITEIVYKGTHNHAKPLNTRRGSGGGAAAAQVLQSGGDASENSFGAMVTTPENSSASFGDDENAVSSPRAGGDNDDDEPDSKRRKDGGDGEGINMAGNRTVREPRVVVQTMSDIDILDDGYRWRKYGQKVVKGNPNPRSYYK…
HvWRKY51	HORVU.MOREX.r2.3HG0230420.1	3H:420664299-420666505	IIc	WRKYGQK	1095	364	38724.2	8.21	48.6	55.6	-0.666	no	nucleus	ATGTCGGGCGAGTTCCAGTTCCAGGACGAGCTCGCGTCGCTCTTCACGCACCGGCCTGGGCCGGGGATGCAGCAGCAGCAGCAGCAGGAGCAGCAGGCGTCCTGGCTCGCCGACTACCTGCAGACGCCCATGGACTACGACCTGCTGTGCAGGGCGCTGGAGCTGCCGGCCGAGGAGGACGTCGTCAAGAGGGAGCTGGTGGTGGACACCACGCCCAGCGCCCTCACTCCCAGCGCCGGCGGGGGGACGCCCAACGCCACGTCGTCCATGTCGTCCTCCTCCAGCGAGGCGGGAGGAGGCCTCTGCGCCGGAGAGGGGGACTCGGCGGGGAGGTGCAAGAAGGAGGACGGCGACGGGGAGGAAGGCAAGGGGGGCGATGAGGGTGACAAGACCAAGAAA…	MSGEFQFQDELASLFTHRPGPGMQQQQQQEQQASWLADYLQTPMDYDLLCRALELPAEEDVVKRELVVDTTPSALTPSAGGGTPNATSSMSSSSSEAGGGLCAGEGDSAGRCKKEDGDGEEGKGGDEGDKTKKGSAAAAKGGKAGKGEKRPRQPRVAFMTKSEVDHLEDGYRWRKYGQKAVKNSPYPRSYYRCTTQKCVVKKRVERSFQDTAVVITTYEGKHTHPIPSAIRGSTHLLAAQAAHLHHQHHAHLAMMPQMGMGGRAGSPFGRSSDVLGGLLQPRGHHGMTPPIIGAGAGHQTSIQGLAGSISATATATAPSPPSLQMQHFMAPDFGLLQDMLPSFIHGAGSNNNNNQPSSPYGKLH
HvWRKY52	HORVU.MOREX.r2.5HG0400740.1	5H:452770168-452771471	IIa	WRKYGQK	996	331	35820.3	8.32	48.89	62.57	-0.597	no	nucleus	ATGTGTTGCTGCTGGACGATGGACACGGCGCCGGTCTGCCTCGACCTCATGGTCGGGCGTCCCATGGACCACGAGCCGTCTCCGGCAAGGTGCACCGGAATGGGAACCCAAGCTTGCATTGCTAGCTCACCCTGTGGCAGAGCACCTCCCATCACCAACGATGAGGCTAAGATCCTGGAGGCGAAGCTGACGCAGGTGAGCGAGGAGAACCGGAGGCTCACTGAAATGATCGCATACCTACACAGCAACCAGGCCGCGCGCCAGAGGCTCGACGGCGATGGCGAGCAGCCCGCCAGCACGGCCGCGTCGCCGACGCCGCCGGCGAGCAAGAAGAGGAGCCGGGAGAGCGTGGACACCTCGCATTCTTGCGATGCCAACAGCAACAGGAACGCACGCACG…	MCCCWTMDTAPVCLDLMVGRPMDHEPSPARCTGMGTQACIASSPCGRAPPITNDEAKILEAKLTQVSEENRRLTEMIAYLHSNQAARQRLDGDGEQPASTAASPTPPASKKRSRESVDTSHSCDANSNRNARTAAPEHVDVDSPLSNATCRRIKVKKVCTRIDPSDTSLVVKDGYQWRKYGQKVTRDNPSPRAYFRCAFAPSCPVKKKVQRSAEDSSVVEATYEGEHNHQRPTRAGERPSCAAGSGGSVPCSISINSSGPTITLDLTKDGGGMQVVEAAGEAQPNLKKVCREVASPEFQRALVEQMARELTGDRNFIDALAAAILRKLPDY
HvWRKY53	HORVU.MOREX.r2.3HG0247760.1	3H:536012382-536016071	III	WRKYGQK	771	256	27674.8	7.15	54.08	56.13	-0.527	no	nucleus	ATGAGGGGGAGCAGCATGCTCAGCTCCATTGGGAGCAACAAAAGGATGCTGCAGCAGGACTGCAGTGGCGGCAGCCATGCCCAGGAGCACACCAAGAAGAAGGCACGTGTCGGCATGAGAACAGACTACACATATGCACCGTATCATGATGGCTTCCAGTGGAGGAAATATGGGCAGAAGGTGATCCGGGGCAATGCCTTCCCAAGGTGCTACTACAGGTGCACGTACCACCAAGATCATGGCTGTTCGGCGAGCAAGCACGTGGAGCAGCACAACTCAGCGGACCCGCCGCTGTTCCGCGTGGTGTACACGAACGATCACACATGCAGCGGCGCTGCTGCTGCGGCATCGGACTACATGGCCTCATCCATGCACATCCAGCAGATCGCCGACGCTTCT…	MRGSSMLSSIGSNKRMLQQDCSGGSHAQEHTKKKARVGMRTDYTYAPYHDGFQWRKYGQKVIRGNAFPRCYYRCTYHQDHGCSASKHVEQHNSADPPLFRVVYTNDHTCSGAAAAASDYMASSMHIQQIADASLRKADTEPERPPRPQQPRSGGGCAAAIKEEKDVIVSSLLAVIRGSCDVAKSDAAHQGYSSASSLASANCYAMSPSVAGGSREGSSSSSVSPAVLPAPDDMGLGLDFMVESHWFEPLDLGWFVE
HvWRKY54	HORVU.MOREX.r2.6HG0502650.1	6H:464887777-464891400	IIe	WRKYGQK	1467	488	51195.9	5.83	48.93	50.12	-0.485	no	nucleus	ATGTGCGACTACTACTTGCAGAGGGTGGAGGGCGACCAGCAGGCCGGAGACCTCACCGACATCGTCCGAGCCGGTGGGGCCATGCCGGCTGGCTCTGCCGATCCCCCGTCCACGGCCACCGAGTGGCTGCAGCTCCCGACTGACCCGATCCTCTTCCCGCCGCCCCAGTCGTCCTCAGACGGCGCCGGGCCGAGCGGGGCCGACGCCGACGCCTTCGGTGACCCGTTCTCCGGCCTCCCCGACCCCTTCGGCACGGACTACCCTTCCTCTTCCGGAAGTGCCGCCGCCGACTTCTTCGATGCCGTCCAGAACGCGATGGATGTCGGCATGGCCAAGCAGGTTGGCTTCGTCGGCACGACCGGCTGCGGCGGCGGTGGAACAACTGCTGGTGCTGGTGGC…	MCDYYLQRVEGDQQAGDLTDIVRAGGAMPAGSADPPSTATEWLQLPTDPILFPPPQSSSDGAGPSGADADAFGDPFSGLPDPFGTDYPSSSGSAAADFFDAVQNAMDVGMAKQVGFVGTTGCGGGGTTAGAGGGFLDMRNHHMFPREMPMCGLSPRAMGPYALMGGGAAKLGVPMAGHGQTAGPCAFDSVAGLQMSSSPRGGGIKRRKNQARKVVCIPAPAAAVAGKTTGEVVPSDLWAWRKYGQKPIKGSPYPRGYYRCSSSKGCPARKQVERSRTDPNMLVITYTSEHNHPWPTQRNVLAGSTRSHYAKNSSNTAAASSKNSKNSSRTQHKPVVKAESKDLSATTQAVTSTTTTATTSTGNNTSPMPVKEEAEMERRIGGETPATVGYYSDHLLQQM…
HvWRKY55/87	HORVU.MOREX.r2.1HG0074420.1	1H:510582783-510581740	III	WRKYGQK	789	262	28090.2	5.27	35.56	71.64	-0.452	no	nucleus	ATGTTGATGGTTCAGTTGTTTTCTCTCACCATGGGCAACCGAGCTAACATCCTACACGACTCCTTCAATAACCTGGTCGGAACCAGTTGGAGTAACACTAACTACTTCTCCTTCGATGCCGATCCCCTGCTCCAGAGATTCAACAGCAGCACGTCTGCCCAGGCCGGCGATCACACGAGTCTGAATCTAAATACAGTACGATACTGGCCGCGGCGCCTACAGGTTCTGAACCTCGGGTTGGAACACCTCGGACAGATTCAACAACAGCTCGTCGAACTGAGGGTCGTACTCGTACGCCATGTCAGCGTAGCCGTGGCTGCCGGCAAGCTGGCACCAGGGGTTCCCCGGCGTGTAGCAGCCCGCCGGCGACGAGGGGAAGGAAGGCGGCGTCAGGGACTC…	MEDTAATLAAELDRLLAMARELEARVDGDQGAPGDARQLCAALAESVDRAIRLAGRSPPGGEGEGEGNATGRSSVTGQVRGGRKSAADKVRTQVRVASVTDVGPLNDGLSWRKYGQKDILGATYPRAYFRCTHRHTQGCRATKQVQRAHADPLLFDVLYLGAHTCAQAAAVLASLEHQPPAAFGLEQQQQQSSSPEGIQWPVESLTPPSFPSSPAGCYTPGNPWCQLAGSHGYADMAYEYDPQFDELLLNLSEVFQPEVQNL
HvWRKY56	HORVU.MOREX.r2.1HG0076100.1	1H:514650133-514652758	IIc	WRKYGQK	930	309	32251.6	6.45	51.61	50.03	-0.58	no	nucleus	ATGCACTCCTCCATGTCCGGATCAGCAGCGGGAGGACAAGGCCCCGGCGTCGTTGGCCTGTTCTACGGCGGCCATCCGCCTGCCGCCGACGGCGACGACGACGTCTTCTTCCAGAGTCATTCAGCGTCCGGCGGCGGTGGCGACGATGGTGGTGTCACCCCGTCGGCCTACTCCAGCATCACCGACTACCTACAGGGGCTTCTCGACCCCGCGGAGCTCGCCAGGCAGCTCGACGCGCCAGCGCCACCGTGCTTCCCGACGGCGGCCGAAGTGATCGGCGCCGAAGCGGCCCCTTTCACGCCCAACTCGTCGACGTCCGGCGAGGCGGCGGGGTGCAAGAGAGGCAGCCCGGCGCCGGAGGAGGGAGACGAGGAGGGATCGGCCGGTCATGGCAGCTGC…	MHSSMSGSAAGGQGPGVVGLFYGGHPPAADGDDDVFFQSHSASGGGGDDGGVTPSAYSSITDYLQGLLDPAELARQLDAPAPPCFPTAAEVIGAEAAPFTPNSSTSGEAAGCKRGSPAPEEGDEEGSAGHGSCRSDEKEQKKKVKGEKKARGSRVAFATKSEVDHLDDGYRWRKYGQKAVKNSSFPRSYYRCTAARCGVKKLVERSQQDPSTVVTTYEGRHGHPSPVAAHRGARMLMATGADTAYSLAALQHQQHGFFPAGADVYGRMCVPPTTAAAPAVPHRSSEYGGMVSYADLLPDAVMGYQQGHR
HvWRKY57	HORVU.MOREX.r2.4HG0313700.1	4H:385716892-385718972	I	WRKYGQK	1119	372	40960.8	7.69	51.23	57.72	-0.936	no	nucleus	ATGTCCCATCAGCAAGCGTTAGCCCAAGTAACAGCACAAGCATTCCATTCTCAGTATACTGTAGACAGTCAAGCAGATTACTCACTCCCTTTCTCATCGGAAGCAACATCAGCTTTGACATCACAGTTTATCAACTCTTCTGCAAATGTGACATCAATGAAGGAGACAGCAACTCCGCCATTGCGTACAGTTCATGATTACCTTAAAACATATGAGGTTTCACAAGGATTCCAAACTTCGGCCCTCACCGTGGATAAACCTGTTGATGATGGCTACAATTGGCGAAAGTATGGCCAGAAGGCAGTCAAGGGTGGAGAGTATCCAAGGAGCTACTATAAATGCACCCAGGCGAGCTGTCCAGTTAAGAAGAGAGTGGAGCACTCAGCATATGGACAGATT…	MSHQQALAQVTAQAFHSQYTVDSQADYSLPFSSEATSALTSQFINSSANVTSMKETATPPLRTVHDYLKTYEVSQGFQTSALTVDKPVDDGYNWRKYGQKAVKGGEYPRSYYKCTQASCPVKKRVEHSAYGQITQIIYRGQHNHQRPPKRRSKDGGNLLNEDDFPENRDALTRSERGSQDHSGKVEVSNDGIAGPSMSKRRDGGDQSSGSSDREEEDNDEAGDDNGDAGIVNANKRQVPAPAQRIIVQTTSEIDLLDDGYRWRKYGQKVVKGNPHPRSYYKCTYQGCDVKKHIERCSQDPTSVITTYEGKHSHDVPVARSSVAAAASANASSSISLLHRGQKAASSGQRVLPRAALHTSDSSLQLKEENEIT
HvWRKY58	HORVU.MOREX.r2.4HG0284540.1	4H:33303687-33305590	IId	WRKYGQK	1023	340	37279.1	9.84	54.03	58.53	-0.715	no	nucleus	ATGGAGGAAGTGGAGGAGGCCAACAGGATGGCCGTGGAGAGCTGCCACAGAGTGCTCGGCTTGCTCACCCAGACCCAGGGCCCGGAGCAGCTCCGGAGCATAGCTCTCGGGACGGACGAAGCCTGTGCCAAGTTCAGGAAGGTGGTCTCCCTCCTCGGCAACGAGCCCTCCGGAGGAACCACCCATCCTAGAGCCAAGGTTGTCAGCAGGAGGCAGACCCCCGGGTTCCTCAGCCAGAAGGGCTTCTTGGACAACAACACCCCGGTGGTGGTGTTGAACAGCGCACACCCTTCCACCAGCTCCGCGCAGGTGTATCCTAGAAACAGCATTTTGGATTCGCAGCCCGCGCACCCAATCGGAGGGCCTCCCAAGCTGGTCCAGCCATTGTCCGCGCATTTC…	MEEVEEANRMAVESCHRVLGLLTQTQGPEQLRSIALGTDEACAKFRKVVSLLGNEPSGGTTHPRAKVVSRRQTPGFLSQKGFLDNNTPVVVLNSAHPSTSSAQVYPRNSILDSQPAHPIGGPPKLVQPLSAHFQFGDSSRYNQFQHQHQQQQQKMRAEMFKRSNSGINLKFDSPSGTGTMSSARSFMSSLSMDGSVASLDAKSSSFHLIGGPAMSDPVNAQQAPRRRCSGRGEDGNGKCAATGRCHCSKRRKLRVKRTIKVPAISNKIADIPPDEYSWRKYGQKPIKGSPHPRGYYKCSSVRGCPARKHVERCVDDPSMLIVTYEGEHNHTRMPTQSAQA
HvWRKY59	HORVU.MOREX.r2.2HG0144420.1	2H:530925128-530928525	I	WRKYGQK	2211	736	77959	6.34	50.86	54.85	-0.72	no	nucleus	ATGGACGGCCACACACACATAGCCATGGAGTGGAAGGACCAGAGCGCACGGCCAGACTGCAGCATGCTGCCGAGCTTCCTCACCGACCCGTTCCCCGCGGACCCCCTGGTGGAGGACTGCGACGGCAACAACGACGGCTCCGAGGGGGCCGGGTTCGAGAGGCACGGCTTGTCGGTGGACGTGGGCTCGCCTCAGGAGGAAGGCAAGCCGATGCCGGCGACGCCGCACTTCGGCCAGAGGTCCAGCTCCAGCAGCAGCCTCTCCGAGCGGATGCAGGCTAGAGCCGGGTTCAGCGTCGCCAAGCTCAGCATGCCTGACAGCGAGTATTCAGGAGCCCAGTCGCCTTACCTGACCATCCCGCCCGGCCTTAGCCCGGCGTCGCTGCTGGAATCGCCGGTG…	MDGHTHIAMEWKDQSARPDCSMLPSFLTDPFPADPLVEDCDGNNDGSEGAGFERHGLSVDVGSPQEEGKPMPATPHFGQRSSSSSSLSERMQARAGFSVAKLSMPDSEYSGAQSPYLTIPPGLSPASLLESPVFLSNAMGQASPTTGKLLMLGDTNNNNNGRLEPPSIEDRPGAFSFKPLDLKSSQYTAEGKKGSLHNSQHPSAPSRDVPVKTETNIQTTTRGANPLGYLNQAQFNNAQDPMKRSYHDCNNKRNRLAADSTAAGGDNNASPPDNSLPAADSEAAKVGDYPAAVATAAPAEDGYSWRKYGQKQVKHSEYPRSYYKCTHPSCQVKKKVERSHEGHVTEIIYKGTHNHPRPAAQGRRPAGGAQVHPFNDAQMDAPADNNNNGGYGNAGGSQP…
HvWRKY60	HORVU.MOREX.r2.7HG0539640.1	7H:28053985-28058744	IIb	WRKYGQK	1830	609	62742.3	9.3	41.15	59.15	-0.465	no	nucleus	ATGATCAAGGGAGACCAGAGGCAGCTTGGCGGCCATGATGAGAGGTTGCAAGACCAGATGAGAGATGATCATCGGGCCTCAGATGGCAATTTTTTCAAGTTCTTGCAAAACCAGTCAAGCACAAAAAAAGAGGCTCAAGAAGACAAGATTGCGTCCACAAGGGCAGAGATGGGCGAAGTGAGAAAAGAGAACGAGCGGCTGAAGACGTTGCTATCACGGATGGTGGAGGACCATCGATCCCTTCAGAAGCAATTCGATGTTCTCCACCAGCAAGGGCGAGGCAAGAACCCCGCCGTGGGCTCACCGGAGCATACATCACCCGCCGACGGCCCCGGGTTCATCTCTTTGCGCCTCGGAACGAGCAGGCAGAACATGGGAGAAGAGATCAAGGGCAACACT…	MIKGDQRQLGGHDERLQDQMRDDHRASDGNFFKFLQNQSSTKKEAQEDKIASTRAEMGEVRKENERLKTLLSRMVEDHRSLQKQFDVLHQQGRGKNPAVGSPEHTSPADGPGFISLRLGTSRQNMGEEIKGNTNNPDGKGISLGPSSARGAVGARTDGSETKVGPDVVTLSPGGSSEEDATTETTTTSAPSKAAKIPRSTGGVEAEEEVAQQPLAKKARVSVRARCDTPTMNDGCQWRKYGQKISKGNPCPRAYYRCTVAAGCPVRKQVQRCAEDMSILITTYEGAHNHQLSASAAAMASTTSAAASMLMSGSSTSLGFPSIASSLHGLRFGLPGASSDASSNQLGGRPFFLPAATGASISATPSYPTITLDLTSQAASQQAFSLSNNNRFSSSFTGSH…
HvWRKY61	HORVU.MOREX.r2.5HG0371550.1	5H:151480913-151486667	I	WRKYGQK	1479	492	52358.6	8.4	59.92	54.02	-0.788	no	nucleus	ATGTCCGCGCGCCCGCCCCCACCGCCGCGCCCGCGTCTGTCCCTGCCCCCGCGCTCCACCGGGGAGTCGCTCTTCTCCGGCACCGGCGACGCCAGCCCCGGCCCGCTCACCCTCGCCTCCGCGCTCTTCCCCTCCGACGCCGACGCCGACGCCGGCGGCGGCGGCGGCAGCGGTGCCTCGTCTGGCGCGGGGGCCACCAGCTTCACCCAGCTCCTCATCGGTTCCCTCTCGCAACCGCCTCCGCATCAGCAGCAGGAGAGAGGGAGAGGCGGGGTCGTCAGGGCAGGGCCGGCGCTGTCTGTGGCACCGCCGGCCGGGGCAGCTGTTTTCACCGTGCCTCCCGGCCTCAGCCCCTCCGGCTTTTTCGACTCCCCCGGTCTAATCTTCTCGCCGGCCATG…	MSARPPPPPRPRLSLPPRSTGESLFSGTGDASPGPLTLASALFPSDADADAGGGGGSGASSGAGATSFTQLLIGSLSQPPPHQQQERGRGGVVRAGPALSVAPPAGAAVFTVPPGLSPSGFFDSPGLIFSPAMGGFGMSHQQALAQVTAQASHSPLRMFDHTEQPSFSAAATSSGALQNMSSAANVAEMSEMATTISNNEHAVFQSAEASHRYQVPAPVDKPADDGYNWRKYGQKVVKGSDCPRSYYKCTHPSCPVKKKVEHAEDGQISEIIYKGKHNHQRPPNKRAKDGSSSAAEQNEQSNDTASGLSGVRRDQEAVYGMSEQLSGLSDGDDKDDGESRPNEIDDRESHCKRRNIQISSQKALTESKIIVQTTSEVDLLDDGYRWRKYGQKVVKGNPH…
HvWRKY62	HORVU.MOREX.r2.7HG0542390.1	7H:37810663-37814623	III	WRKYGQK	1128	375	39290.3	5.84	54.1	57.71	-0.499	no	nucleus	ATGCAGGACGTTGGCGGAGGAGGAGGAGGAGGAGGGGACGGCAATAGCATGCATCTGCTCCTGACCATCCTGGCCGACGGGGAGGCGCAGGTCAGGCGGCTCCTCGGCGAGCTGCCGCCGGCCGGCGACGAGGAGCAGCTGCTCGGGCGGGGGCCGGCGGCGGAGTGCTGCCGGGGCGTGGCCGGGCAGCTGCTGTGCACGTTCGGCAAGGCCATCGCCGTCGCCAAGGCCATCGAGGCGGCCGGCGGCGACTCCCCGCGGTCGGCCGACGAGGGCGCCGGCGCCGGGATGGCCGGCAGGGACGCGGCGCATGCGCAGGAGCGCCATGGCCATGGCGTCTGCAAGAGAAGGAAGGGCTTGCCAAGATGGACCGAAAAGTTCCGTATACCCGACGACGCA…	MQDVGGGGGGGGDGNSMHLLLTILADGEAQVRRLLGELPPAGDEEQLLGRGPAAECCRGVAGQLLCTFGKAIAVAKAIEAAGGDSPRSADEGAGAGMAGRDAAHAQERHGHGVCKRRKGLPRWTEKFRIPDDANLEYTPDDGFSWRKYGQKDILGAKFPRGYYRCTYRNAQGCAATRQVQRSDADLAVFDVTYQGAHTCLQAQRRAAVPPPPPPATHDGGGGQQQDADMQLLENFRNGLKVEITDGPPPPASFYGHGHDALSLPYTAAAGYSYSVGGQQQQLQGGGCFSPATFSSPAATTAAGPGYFSVSAAHCALGTHDSPELAEVVSAATTATDPAGFDYSLYQYHDLPFPFDPTMFGHRSSSHGQHGDASRN
HvWRKY63	HORVU.MOREX.r2.3HG0196880.1	3H:51217747-51218436	IIc	WRKYGKK	690	229	24115.6	6.07	50.14	50.13	-0.428	no	nucleus	ATGGCGGCCTCGCTGGGACTTACCAGCCATGAAGAAGCCTGCTACTCTGCCCACCCGGCCGGCTCCTCCCTGTACAACTTCCAAGACGGCGAACCCTTCGGGGCGGCGGCCGACGGTGCCGCGGCGCTGAGCTTCCAGGAGCTCGTGGACGCCGCTCGACCCTCCGACTACGCGCCGCTTCCGGCGTTCGGCGCCGCTGGAGGCGAGGCGATGAGCATGTACGAGCGGAGCGTCGTCTTCCCTATGACGACGTCCTCGTACTACTGCGACGGCGCCGGGATGTTCGACGACGACGCGGCGGCGAGGGGGAGAGGGGGAGGGGTCGGTGCTATGGCAGGGCGGCCGTCGGGGAGGATCGGGTTCCGGACCCGGTCGGAGGTGGAGGTGATGGACGACGGG…	MAASLGLTSHEEACYSAHPAGSSLYNFQDGEPFGAAADGAAALSFQELVDAARPSDYAPLPAFGAAGGEAMSMYERSVVFPMTTSSYYCDGAGMFDDDAAARGRGGGVGAMAGRPSGRIGFRTRSEVEVMDDGFRWRKYGKKAVKSSPNLRNYYRCSADGCGVKKRVERDRDDPRYVLTTYDGVHNHVAPGGGTPSRAAPAYSAPAAPAWTWSELHAAAAAAAHSSESY
HvWRKY64	HORVU.MOREX.r2.3HG0226640.1	3H:384119200-384120721	IIe	WRKYGQK	957	318	34793.2	6.6	59.69	65.35	-0.637	no	nucleus	ATGTGCGGCCTGCTTCTGCGCATGGAGCACCTCAACGACTGGGACCTGCAGGCCGTCGTCAGGAGCTGCACCACCTTCTCCTCCCACCCCCAGGACCGCGCGGGTCCTTCTCCGTCTCCGGCGCCGGTGCCGGAGACGACGGTCAAGCGGGAACCACGCGGCGACGTGCTCCGGCCTGCATCCGCGGCCAAGGACGCGCCGTCGCTCTACGGCCTCGAGTACCTGGACTTGGATCACAAGCCCTTCTTGCTGTCGGCACCGTCGCCGCAGTCGTGGGCGGCAGTGGATGACCGCCATGAGATGATGATCTCTTTCCCCGCGGCCGCGTCCACGTCCGGCGTGCGCCCGCGGGTGCCGCCTGGCCGGAAGCCCGGCATACGAACCACCACCCCGCGCCCG…	MCGLLLRMEHLNDWDLQAVVRSCTTFSSHPQDRAGPSPSPAPVPETTVKREPRGDVLRPASAAKDAPSLYGLEYLDLDHKPFLLSAPSPQSWAAVDDRHEMMISFPAAASTSGVRPRVPPGRKPGIRTTTPRPKRSKKSQLKKEVREVPVADGGVSSDLWAWRKYGQKPIKGSPYPRGYYKCSSMKGCMARKLVERSPAKPGVLVITYMAEHCHPVPTQINALAGTTRHKSTPAEDHVTTTTTSPKRHGNAHEPVRCEDESNETSSMAVDGTTEDAAVDDGSDFWPTELDLDELLAPVDGDLDHVFDEDGALGRRLSL
HvWRKY65	HORVU.MOREX.r2.5HG0425470.1	5H:539811344-539824383	I	WRKYGQK	1260	419	45365.1	6.99	64.69	52.27	-0.864	no	nucleus	ATGGCCGATCGGCGTGGCGACGCCATGCGCCAGCAGCCGCCTTACTCGTCCGGCCACCAGGAGCGGGTCTTCGACGGTGGCGGCCCGGAGTTCGGGAACGATTACGATCCTGGATCATCCTACATGTCGCTTCTTGGCTCCGGCGTCAACCCCCAGCAGTTGCTGCCGGCGCCGCCGGCGTGGGGGGTCGAGGAGGTGGCCCCGCCGACCATTAATCTCACGCCTCAGTTCTCCATGGCAAACTACGTGCCGACGTCTTCATACCAGCAGCACCAGACGGCCGCATCCTTCGTGGCACCCCTCGCCGCCAACCTCCACCCCTACCCCTCATCGTCGTCGTCGTCCTACTTCCAGGCCGACCTGCCGCCGCAATGGCCTCCGCGGGCAATGGCGCCGTCG…	MADRRGDAMRQQPPYSSGHQERVFDGGGPEFGNDYDPGSSYMSLLGSGVNPQQLLPAPPAWGVEEVAPPTINLTPQFSMANYVPTSSYQQHQTAASFVAPLAANLHPYPSSSSSSYFQADLPPQWPPRAMAPSPSSSLLPRNFTVHQTPAYPHHHEQQMHMQLLRAAALGGPHAPPAPPIEQPAKDGYNWRKYGQKQLKDAESPRSYYKCTRDACPVKKIVERSFDGCIKEITYKGRHTHPRPPEPRRSGAGADDVAAPSSAAGAQEDELSDDEDDGEEGHDIASGAGGPAGQRVVKKHKIILQTTSEVDLLDDGYRWRKYGQKVVKGNPRPRSYYKCTAENCNVRKQIERASTDPRCVLTTYTGRHNHDPPGRGAGAAAAAGAGGGSSSDPVPSTVNP…
HvWRKY66	HORVU.MOREX.r2.6HG0513200.1	6H:531718064-531720293	IIb	WRKYGQK	1692	563	59163.9	5.1	49.97	57.46	-0.718	no	nucleus	ATGTCATCATCCAAGAGGAAGAGGGCGGACATAGATCTCGAGAGGAGGGACGACGACGGCGACGACGGCAGCGGCGATCACCAGCCCGTAGAGGCCGCGCCGGCACCGCCGCGGCTGCAGAAGGAGGGACAAATCAAGGAAGGAGAGGCACAAGCCAAAGAGGTTGTTGAAGTGGTTGTGGACCGAGGAGGAGACGCCTCCAAGGAGGAGATCAAGTATGGTACTCAACAAGAAGGGTTGATGGAGGAGGACAAGCAATCTGCTGCCGCAGCAGCTGGGAGCGATGGAGGCGGAGGCGTCGACGATGAGGAGAACGACGGTCCGGGGACTCGCGCAGAAGACAAGCACATGGTAGAGGCGGCCCCTGGCGACGGCAACGGCGACGGCGACCATGACCAT…	MSSSKRKRADIDLERRDDDGDDGSGDHQPVEAAPAPPRLQKEGQIKEGEAQAKEVVEVVVDRGGDASKEEIKYGTQQEGLMEEDKQSAAAAAGSDGGGGVDDEENDGPGTRAEDKHMVEAAPGDGNGDGDHDHTAMAQDELSTMQEEMEKMKEENKMLRRVVDRTVRDYYELQTKLAAYQKQPADQEPKETEVFLSLGGTAPAVAEAKSKEEQAARRPSVGSDDTDDGREGLGLSLSLRTSSYEDETRHDVVDGGAPDIVSDVGKARGYALLESSRMSPPASGDVAAAGGIAGQQGVNAANRKTRVSVRVRCQGPTMNDGCQWRKYGQKVAKGNPCPRAYYRCTVAPACPVRKQVQRCQEDMSILITTYEGTHNHPLPVGATAMASTATAGTGAATFML…
HvWRKY67	HORVU.MOREX.r2.5HG0400720.1	5H:452619431-452620588	IIa	WRKYGQK	549	182	20281.9	8.3	39.44	71.26	-0.603	no	nucleus	ATGGACGACGGTTCGTCATGTCCGACCAACAGCGCCGGGCTTCTGCCGCTCTCCGCCGGCTCCCCGACGAGCGTCAAGGACGGGTACCAGTGGAGGAAGTACGGGCAGAAGGTGACGCGCGACAACCCGCACCCAAGATCCTACTTCCGCTGCGCGTTTGCTCCATCTTGCCCCGTGAGGAAGAAGGTGCAGAGAGACGCGGAGGACACGTCAAAGCTAGTGGCGACGTACGAGGGCGAGCACAACCACGCTAGATCCCCGGAGAGAGAATTCGTCTGCAACGAGTCCATAGCCATAGGCCACAGGCCGTGCTCAGTCTCCATTAACCCGTCCGGCCGGACGATCAGGCTAGAAGATATGACGAACCATGGGTCAGGATCGAGGCTGGACCTGGAGACT…	MDDGSSCPTNSAGLLPLSAGSPTSVKDGYQWRKYGQKVTRDNPHPRSYFRCAFAPSCPVRKKVQRDAEDTSKLVATYEGEHNHARSPEREFVCNESIAIGHRPCSVSINPSGRTIRLEDMTNHGSGSRLDLETIRREVVTPEFQKLLVEKMVNSLKNDADFMHALTNAVAERILEIIPARLS
HvWRKY68	HORVU.MOREX.r2.2HG0153650.1	2H:585828017-585831848	IIc	WRKYGQK	693	230	25128.4	8.84	48.36	55.17	-0.594	no	nucleus	ATGGAAGGCGGTAGCCAGCTGGGGGCGTGCCTTCCCAGCCTCTACGCGCTCGATCCGTACGCATCCCCTCCCCTCCTCGCTCCATTGCCGAACCAGCACAAGCTTCACCAGATGCCGTTGGTGCTCCAAGAACAGCCCGGGAACCACGGCGTGATGTTCTCTTCGGACCATGGCGGTGGCCTGTACCCGCTGCTTCCGGGGATCCCCTTTTGCCACTCCGCCGCCTCCCTCGAGAAGCCCACCGGGTTCGCGCCCTTGGGCGGCACCGGCGAGGCGGGCACATCGGCGGCCAGAGCGGGCAACGAGATTGCTGCTACTACTACCACTACCACCACAGCCAGCTGCCATGGCCCGAGCTCATGGTGGAAGGGGGCGGAGAAGGGGAAGATGAAGGTGAGG…	MEGGSQLGACLPSLYALDPYASPPLLAPLPNQHKLHQMPLVLQEQPGNHGVMFSSDHGGGLYPLLPGIPFCHSAASLEKPTGFAPLGGTGEAGTSAARAGNEIAATTTTTTTASCHGPSSWWKGAEKGKMKVRRKMREPRFCFQTRSEVDVLDDGYKWRKYGQKVVKNSLHPRSYYRCTHSNCRVKKRVERLSEDCRMVITTYEGRHTHTPCSDDDAGGDHTGSCTFTSF
HvWRKY69	HORVU.MOREX.r2.1HG0073000.1	1H:507003312-507005991	IIc	WRKYGQK	1230	409	43250	6.74	49.02	50.81	-0.673	no	nucleus	ATGTCGGGGGCGAGCCATGACCAGCACTGGCGCCACCACTCGGGCGACTTCCAGTTCCACGACGAGCTGGCCTCGCTGCTCGCGCAGCGGCCGGCCGACGCCGCCGCCTCGCCGTCGCCCATGATGCAGATGCAGCAGCCGCAGACGCCGTGGCTCTTCGCCGACTACCTGCAGGCGCCTGGGATGGACTACGACGACGCCTTCGCCAGGGACTTCATCGGCTCGCCAGCCGGCGGCGGCGTCGAGGAGGAGGTGAAGCGGGAGATGCTGGCGGTGGACGGTGCCGCCGCTGGCGTCGCGGGGATGCCTGGCGGCGGGCCGGGCGGGACGGCGCACAGCGTGTCGGTGTCGTCCACGTCCAGCGAGGCCGGGCTCGGCGGCGGCGGCGCCGTGGAGGAC…	MSGASHDQHWRHHSGDFQFHDELASLLAQRPADAAASPSPMMQMQQPQTPWLFADYLQAPGMDYDDAFARDFIGSPAGGGVEEEVKREMLAVDGAAAGVAGMPGGGPGGTAHSVSVSSTSSEAGLGGGGAVEDEAGKCKKEDGDGDGDDESKEAAAVGGGDGDADKTKKGAAKGKGAAKVKGEKRPRQARFAFMTKSEVDHLEDGYRWRKYGQKAVKNSPFPRSYYRCTTQKCPVKKRVERSYQDAAVVITTYEGKHIHPIPATLRGANHLLAAHAHAHGGQGLIHPSMFRMPAPPGAAFRPGDALGSFLQQQHAAMQHQQQVAAAGMAMRQANAMAGGHMQAPPADHRGLAGGTTGNNTHAISSSSSATDPLRMEHLMAQDYGLLQDMLMPPSSFAHS…
HvWRKY70	HORVU.MOREX.r2.3HG0247840.1	3H:536940330-536941319	III	WRKYGQK	825	274	29234.7	6.25	50.75	71.75	-0.362	no	nucleus	ATGGCGCTCGGCACCCCGACCGCCGTGGTGCTGGAGCTGATGACGATGGGGCAGCAGTCCGCGGCGCACCTCGGGGAGCTGCTCCGGGCGGCGTCCCCGCCGGTGCAAGCAGAGCACCAAGCGCTCGCCGCGGAGATCATCCGCTGCTGCGACAGGGTGATCGCCGCGGTGACCGCGGTCGCCGCCGATAAAAAGAGGAAGGCTATGGACCCCGGCGCTACATCCCGCCGTCCAGGTCCCGCGGCCGCGATGCCGTCCAAAAGAAGGGTGCGTGGCGCGGAGGCGCACAGGGAGGTCCATGCCGGCACGACGGCGGACGGGTTCGCGTGGAGGAAGTACGGGCAAAAGGACATCAACGGAAGCAACCACCCGAGGCTCTACTACCGCTGCTCGTCCAGT…	MALGTPTAVVLELMTMGQQSAAHLGELLRAASPPVQAEHQALAAEIIRCCDRVIAAVTAVAADKKRKAMDPGATSRRPGPAAAMPSKRRVRGAEAHREVHAGTTADGFAWRKYGQKDINGSNHPRLYYRCSSSGEGCAATRRVQRSQEDPAAFIIAYYGEHTCGAGLGDACQQQRAAPAPPTVVDTGSIARGIVGADDWNRNSPLLLPLSAEHSAHAAPGDTSRRWLSPSSSSSYSSEVEVELGASPVEEFLDGNFDWEWETVVNSLRFGDLLQ
HvWRKY71	HORVU.MOREX.r2.7HG0584730.1	7H:429893586-429896051	III	WRKYGQK	1026	341	35820.8	8.58	57.2	55.89	-0.416	no	nucleus	ATGGCGTCTTCCGGCGGCGGGCGCTCACCGGCGACGGCGGTCTTAGACGACCTGGTCGATGTTCGCGACCGAGTGGGGATGTTGCAGACCGTACTGCATGAGTCTTCGCCTCGGGCGACCGCGGAGGCGGGGGAGCTGGTGGAGGGGATGATGGCCAAGCTGTCGAGCTCCATGTCGGTTCTCGGCACCGGTGATGGCGTCATAGCGTCGTCGTCGGGAGCAGGTCGGGAATCGGGCGGGAGGAGGGAGAGAACCGGCGCGGCGGCGTCCGGGCCGCACCGCCGGAGCAGCCCGAGGAGAAGGATGAAGAGCCCTCTAATCAAGACGGTCACCACTACAATGCTCACGGATGGCAAGTCATGGAGGAAATACGGACAGAAGCAGATAAATGACTCTACT…	MASSGGGRSPATAVLDDLVDVRDRVGMLQTVLHESSPRATAEAGELVEGMMAKLSSSMSVLGTGDGVIASSSGAGRESGGRRERTGAAASGPHRRSSPRRRMKSPLIKTVTTTMLTDGKSWRKYGQKQINDSTRSYYRCTHKPDQGCQAKRHVQESESNPAEYTIDYYGQHTCRDPSTFPSLIAQGAAAAAPPPDFANLISFAPINGSNRGFTASTSTSAFAHHLMKEAADHHSMLFSRFSNHSSSPPAQEGVSSGSPSPACHGKFMQYAGGQFINVTGLSTSPLTVGSAPAEYWPVVGVAGVDMDAGAAMDSFASPPSSPGFLSGSLEGSFGNNVCHWRI
HvWRKY73	HORVU.MOREX.r2.5HG0446310.1	5H:594325472-594329155	IIe	WRKYGQK	1065	354	38269.8	5.94	55.33	64.29	-0.516	no	nucleus	ATGGATATGGAGGAGCAAGCCAACGCCGCCGCCACTGCTGCGCGAGAAGGCGACCTCGCCGACGTCGTGGCCCGTGCCAACGCAATGGTCTACTCCACTGGAGCCCGTCGCCAACCACCACCACCTCCTCCTTCTGCGCCAGCTCGTGTCATGATCCCCTACGAGGAGCGGCCTGCGAACGTCGCCTGCGGCGGCGGCGACGGCGAGGTTACGCTCGAGGCGTCGCCGTCGACCGTTGTCGTCGACCCGTACCTGCTGGTTGCGGCCGGCGGATATGGACTGCTGCCGCAGCAGCAGCAGCAGCAGCACCAGCACCAGCCACTGCTGGCTTTCCAGATCTCTGAGCACGCGTGCTGCGCCGCCGCCGACAGCGACGACCCCATGAGGATCTCGCCACCA…	MDMEEQANAAATAAREGDLADVVARANAMVYSTGARRQPPPPPPSAPARVMIPYEERPANVACGGGDGEVTLEASPSTVVVDPYLLVAAGGYGLLPQQQQQQHQHQPLLAFQISEHACCAAADSDDPMRISPPPPAPHHQMIMRRNDVRKVVCIPAPPVMSNRAGGGGEVIPSDLWAWRKYGQKPIKGSPYPRGYYRCSSSKGCLARKQVERSRSDPNMLVITYTAEHNHPWPMQRNVLAGYARAHTHAAAKKQHKISSSSTTDNAASSSSSNNFHVEQNNLIAGDQLPVNCMMPNSTAYAGDDGGGLVFEGIQPDEVFAELEELEETDNCPMVIGANVYGSRGVSSNYEWHKF
HvWRKY74	HORVU.MOREX.r2.1HG0042200.1	1H:360698044-360699171	IIe	WRKYGQK	1023	340	36775.1	6.59	52.92	64.29	-0.575	no	nucleus	ATGTGCGACCTGTTTTGGCTGTCGCCGGGCGAGCAAGGAGACCTCTCCGATGTCGTCAGGGCAAGCCTGCACCGGCCTCATCAGCTGCCAACCCCGGCTGCCGACGAGGAGGAGGAGGAGTACAGCTCGCTGCTACGGGAAGGAGGTAGCGGTGGAGACGGCCTGGTCGTCGGCCATGGGCATGGCGATGAGCAGCTGGGAATGGTGGCCATGATGATGGGCGGCAATACCAGGCTTCCCTCGTCTGATCATCACGTGATCTCGCTGCATTCACCGCCGGCGACGACATATACACGGCCGCATCCAGAGCCACTGGCCGGGATGATTCGTCGGCCGGGCATCGGCAGGGAAGGCGAGATGGTGGTCGCGCCGCCGCCGGAGATAGGCGAGCGCCTGCAG…	MCDLFWLSPGEQGDLSDVVRASLHRPHQLPTPAADEEEEEYSSLLREGGSGGDGLVVGHGHGDEQLGMVAMMMGGNTRLPSSDHHVISLHSPPATTYTRPHPEPLAGMIRRPGIGREGEMVVAPPPEIGERLQHMSIVHHPRVPAAMKPRKSQSKKVVCIPAPTAAPGASGRHSTSGEVVPSDLWAWRKYGQKPIKGSPYPRGYYRCSSSKGCPARKQVERSRTDPNMLVITYTSDHNHPWPTQRNALAGSTRPSSSSAARIAASSSSSSLAATAARNSSNTNVDVDCAGVHHQLKQESDLDLFADMDALNVFSSINKIQEDDSKQQLFDPFSSGFCDYI
HvWRKY75	HORVU.MOREX.r2.6HG0497280.1	6H:411768730-411771256	IIc	WRKYGQK	684	227	25332.8	8.9	47.21	57.49	-0.574	no	nucleus	ATGCATACATGCATGGATCACGGGAGTCAATTGGGGATGGCTTACTGTCTTCCCAACCTCAGTGTGCCGGATCACTACTACACCACCCCTGTTCCTCTTTCTCCACTTCAACTACCCTCCCATTCCAAGCCTCTCCAGATGCCATTGGACCACGAAGAAGCAGTGATGCTCTCTTCTGACCATTGTGGGCTATACCCGCTGCCAGCGCTTCCGTTCGGCCACGGCCACTCCGGCGCCGTCGTCTCCAAGAAGCCCGCGGTCGGTTTCATTCCTAATATTGGGGCTGAGGAGGTGGGCACATCGACGGTGACGGCAAGAGTTGGCTATGAGGGTGCTACTGCCTGTAATACATGGTGGAGGGCCTCGACGGCGGGGGAGAAGGGGAAGATGAAGGTGAGG…	MHTCMDHGSQLGMAYCLPNLSVPDHYYTTPVPLSPLQLPSHSKPLQMPLDHEEAVMLSSDHCGLYPLPALPFGHGHSGAVVSKKPAVGFIPNIGAEEVGTSTVTARVGYEGATACNTWWRASTAGEKGKMKVRRKMREPRFCFQTRSDVDVLDDGYKWRKYGQKVVKNSLHPRSYFRCTHSNCRVKKRVERLSTDCRMVITTYEGRHTHPPCDDNSSSSGDNTTTCF
HvWRKY76	HORVU.MOREX.r2.3HG0273730.1	3H:622987878-622989919	IIc	WRKYGQK	1155	384	40427.7	5.25	61.69	57.27	-0.52	no	nucleus	ATGGAGGAGATGGGGCAGGAGAGCAGCAGGTATCCATGGCAGGACTACGACCTCGGCTTCGGGGAGGAGCTCATGAGGGAGCTCCTCGACGAGACGGCGGCGGCGGCACCGTCGCCAACACCAACGGCGGCCGGCGCTGGTTGCGCTGATAATTCTTCTTCTTCCAATAAGGGGATTGGTGATGATGAGGAGGAAGGTGGGGAGGGGCCGGCGGGTAGGCGCCGGGAGTCCATGGTGAACAGGCTCATGTCCACGGTCTACTCCGGGCCCACCCTCAGCGACATCGAGAGCGCCCTCTCCTTCACCGGCGCTGGCGCCGGCGACCCGCTGGACGGCCGCGGCAAGTACCACTACACCCCCTCCAGCCCAGTGGTTTTCTCGCCGGAGAAGGTGCTGGGC…	MEEMGQESSRYPWQDYDLGFGEELMRELLDETAAAAPSPTPTAAGAGCADNSSSSNKGIGDDEEEGGEGPAGRRRESMVNRLMSTVYSGPTLSDIESALSFTGAGAGDPLDGRGKYHYTPSSPVVFSPEKVLGKMENKYTMKIKSCGNGLADDGYKWRKYGQKAIKNSPNPRSYYRCTNPRCNAKKQVERAVDEPDTLVVTYEGLHLHYTYSHFLQHQTTPPPAAAVAASSSKKPKLHPAAGAITDSHHPGSAPVTTTSPPSAAVVPAGAGDSSGDSRGNVSADAGFLLEHAVPNCSSYLFDGDLFSDAGEERRMPSDAGGLLEDMVPLMVRRPSCNSATTTASSSTAVGSPAAPVSSPSPSTSSVSWTPASPYIDMAILSNIF
HvWRKY77	-	5H:529275863-529276762	IId	WRKYGQK	900	299	31135.3	9.9	41.9	65.48	-0.386	no	nucleus	ATGGCCGTTGTGGGACGCGGCTACGCACCCCGTGGCCTCGCGGCCGGGGAGCAGCAGCTGGCCTTCCACGAGGCCGCCGCCGAGGGGCTCAGCAGCCTCGAGCTCCTCGTTTCGGCGCTCTCCCCGCGCGCCGACTGCGCGCCGCCGCCGCTCGGGGAGATCGCCGACCAAGCGTTGTCGGGGTTCCGCCGGGTCATCGACATCCTCGGCCGCACCGGCCACGCCCGCTTCCGCCGCGGCCCTGCTGGGGCTGCCGTCGCCGCCTCGTTGACTGCCCCTCCTGTCTCTTCTCCTCCTCGGACGCCGGCCCATGCACCGGCACCGGCACCAACAGCCTCGCTGCAGTTGGCGCCCCAGAAAAGCCTGACGCTGGACTTCACTAAGCCTTTGAAGGCGCCG…	MAVVGRGYAPRGLAAGEQQLAFHEAAAEGLSSLELLVSALSPRADCAPPPLGEIADQALSGFRRVIDILGRTGHARFRRGPAGAAVAASLTAPPVSSPPRTPAHAPAPAPTASLQLAPQKSLTLDFTKPLKAPATAAAASVTSTSFFSSVTAGGDGSVSKGRGQMVSSGKPPLAAGTKRKQQQQQTPCAIGAHSDAVAAVAGDRCHCSKKRKHRVKYTTRVPAVSSRTADIPGDDYSWRKYGQKPIKGSPYPRCYYRCSTAKGCPARKHVERATDDPAMLVVTYEGEHRHDTSPPAAAN
HvWRKY78	HORVU.MOREX.r2.7HG0591390.1	7H:486815890-486817436	III	WRKYGQK	927	308	32834.4	8.19	45.33	63.51	-0.539	no	nucleus	ATGGAGACCCCGTTCGCGCAGGTGACGGATGATCTGATCAAGGGGCGGGAGTTGGCAACGCAGCTGCAGGGCCTCCTCCGGGACTCCCCCAAGTCCGGCCTCATAATGGACCGGATCCTCCACGCCTTCTCCCGTTCCATCCATGCCGCCAAGGCCGCGGTCGCCACCAGCGAGAGGGCGTCGTCCGACGTGCAGAGCGAGGTCATCGACGGCGTGAGCGGCGGCGGGAAGAGGAAGCCCGCCTCCGCCGCCGCTGGAGGAAACCGCAGGGCCTGCCGGAGAAGCAGGACCCAGCAATCGTCCGTCGTCTTCACGAAAAGCATCAAGAGCTTGGACGACGGGCATGCATGGCGCAAGTACGGGCAGAAGGAGATACACAACTCCAAGCACTCGAGGGCC…	METPFAQVTDDLIKGRELATQLQGLLRDSPKSGLIMDRILHAFSRSIHAAKAAVATSERASSDVQSEVIDGVSGGGKRKPASAAAGGNRRACRRSRTQQSSVVFTKSIKSLDDGHAWRKYGQKEIHNSKHSRAYFRCTHKYDQLCAAQRQVQRCDDDEGMFRVTYIGVHTCRDPAAAVAPHVLHLTGTAEGMHAGCRLISFAPGGAAATTHDATASTTTNANLVDKDAATGSGRQGMKPESGDQEEVLSSRTPGNSAPRSTAPAATAPAWPDQGDVTSTRQYGGAVSFGEYLDDYTSLGDLASYVLDH
HvWRKY79	HORVU.MOREX.r2.2HG0129050.1	2H:386025261-386028040	IIc	WRKYGQK	858	285	30175.7	6.55	60.55	58.07	-0.457	no	nucleus	ATGGCCGGCGTCGCGTGCGGCGGGGGGGACTGGCCCTTCTCCGCCGAGGAAGCGTACGCCGATTCCTCTGCGCTGTTGGCGGAGATCGGCTGGGCGGCCGGTTTCGTGGACGATGGCTGCGCCGGGGAGCTGCTTCCGCCGCTGGATCTGCCTCCGGCGACGCCGGCGGGGTCCATGGAAGGGGCCGGCGCGTCGTCGAGCTCCACCGATGACGGTGCAACGCGGGAGGCTGCGGACGCCGACGGGAGGCCGGCCGCCGCGACAGAGGCAGCGAGCAAACCGGCGCCAGCGCCGGCCCCGGGGAAGGCGATGAAAAAGCAGAAGCGGGCGCGACAGCCGCGGTTCGCGTTCATGACTAAGACGGAGATCGACAACCTCGAGGACGGATACCGCTGGAGG…	MAGVACGGGDWPFSAEEAYADSSALLAEIGWAAGFVDDGCAGELLPPLDLPPATPAGSMEGAGASSSSTDDGATREAADADGRPAAATEAASKPAPAPAPGKAMKKQKRARQPRFAFMTKTEIDNLEDGYRWRKYGQKAVKNSPFPRSYYRCTNNKCTVKKRVERSSEDPSVVITTYEGQHCHHTVTFPRGAGAATLASQMAFSAHHHHLMYNDLPALHSPTAQNPLFSVSAMSSSLLQPLHCNRQELQVASYTAQTSSISSPGSVPAVDKGLLDDMVPPSMRHG
HvWRKY80	HORVU.MOREX.r2.5HG0384210.1	5H:325574369-325576083	III	WRKYGQK	1014	337	36446.2	6.71	65.49	55.7	-0.704	no	nucleus	ATGCAGAGGAGCAGAGGTTGTGCCCCGGGTGGTGAGCACGGCTGGGCAGCGGCGGACGGCGGCGGGATGCAGCTGCAGCGCCGGGAGAGGGAGCTGGTGGCGCAGCTGCACGAGCTGCTGTACCCGTCCACGTCGCCGTCTCGAAGCGGCGCGTCCTCGTGTTCTGGCCTTGCGGCTGAGTTGTACTGGGAGCACGGCAGCTCGCAGGTGAAGGCAACGGCGTCGTGCGGCGGAGGCAAACGGCGCGGGGGTCGCAAGAGAGCCCGGGAGGATGAACGGCACGAGGAGGGGCAAGGACAACGCGCCGGTGCTGCGACTGCGACGAAGGCTACTACTCGTTGCAGGAGGAAGAAGCTAGGCACAACGACGAGGACGCTCGTCACGACGGTGCCGGATTTC…	MQRSRGCAPGGEHGWAAADGGGMQLQRRERELVAQLHELLYPSTSPSRSGASSCSGLAAELYWEHGSSQVKATASCGGGKRRGGRKRAREDERHEEGQGQRAGAATATKATTRCRRKKLGTTTRTLVTTVPDFDGYQWRKYGQKQIEAAMHPRSYYRCTNSTNQGCPAKRTVQRNDDDGNDNGRPKYTVVYISEHSCKSTESAAVPVILETTVRADTAAAPDVDVVPGSSSSAISSETQSPASSSDLTWSSGGSEDGANPPPRARDDYSRLFAIEDECWWWNPSPAPAVAPALLQEMDFDGPIRSPVHVAAADGSWINDLFVNEPPFVLNSCHLFAL
HvWRKY81	HORVU.MOREX.r2.4HG0341890.1	4H:602729519-602730793	IIe	WRKYGQK	852	283	30440.3	9.32	51.62	68.98	-0.475	no	nucleus	ATGGACTCCGGCGATTGGGGCCTCGAGGCCGTCGTGAGGAGCTGCGGCGGCTCGACCGTAGTCCCCGGCTCGGAAGCAGAGCCAGAGCCTCCAGCTGCACGGGCTCGCCGAGGAGTCGCCGCCCGTGTGGAGTTCGTCGGGCAACGAATGAAAGTGGCGGCCTCCTCGTCGTTGTACGACGTCCTGGAGGTGCCTCAGCCGCCATTTTCCATCACGCCGTCGTCGGCTTCCCATGAGCGCAGCATGTTCTTCTCCCTCCTGTCTGCCTCGACGTCCAGGCAGACGCTGCCGGGAAGGAAGCAGGCTGGCCGGAAACCGGGCGCTGGTGCTCCCACTCCCAGACGGCCGAAAAGAAGCAAGAAGAATGTGGTGCGGTTGGTGCCGGTGGCCGACGGCGGC…	MDSGDWGLEAVVRSCGGSTVVPGSEAEPEPPAARARRGVAARVEFVGQRMKVAASSSLYDVLEVPQPPFSITPSSASHERSMFFSLLSASTSRQTLPGRKQAGRKPGAGAPTPRRPKRSKKNVVRLVPVADGGVNNSTVDDLWAWRKYGQKPIKGSPHPRAYYKCSSLRACTARKLVDRSPAEPEALIVTYIDDHCHAVPVLINTLAGTAHHPPKSPRGTTASGEAAPASREVDDADVPSSIAAELADDKSKLRARARVELDDFFGSFQFPQHRVFEDVGDHV
HvWRKY82	HORVU.MOREX.r2.3HG0247850.1	3H:536996640-536997621	III	WRKYGQK	783	260	27717	7.66	41.22	67.38	-0.385	no	nucleus	ATGGCGCTGGCCACCCCAACAGCGGTGGTGCTGGAGCTGATGACGATGGGGCAGCAGTCCGCGGCGCACCTCGGGGACCTTCTCCGGGCGGCCTCCCCGCCGGTGCGGGCGGAGCACCAGGCGCTCGCCGCGGAGATCCTCCGCTGCTGCGACCGGGTGATCGCCGCGGTGAGCGCCGGCGCCGCCGGTAAAAAGAGGAAGGCGATGGACCCAGGCAGCCATCCTCACGCTCACGCGGCCGCGATGCCGTGCAAACGAAGGGTGCGTGGCGCGGAGGCGCACAGGGAGGTCCATGCCGGCACGACGGCGGACGGGTTCGCGTGGAGGAAGTACGGGCAAAAGGACATCAACGGAAGCAACCACCCGAGGCTCTACTACCGCTGCGCGTTCAGAGGCGAG…	MALATPTAVVLELMTMGQQSAAHLGDLLRAASPPVRAEHQALAAEILRCCDRVIAAVSAGAAGKKRKAMDPGSHPHAHAAAMPCKRRVRGAEAHREVHAGTTADGFAWRKYGQKDINGSNHPRLYYRCAFRGEGCAATRRVQRAQEEPAAFVIAYYGEHTCGAAVCRQSAEPLPPSVVDSGSNARGIVGATAIDQNRGSPLLPAGDQHGAQRHGQAPCDTSRGWLSPSSSSYSSEEFLDGSFDWEWETVVNSLSYGDLLQ
HvWRKY83	HORVU.MOREX.r2.2HG0083410.1	2H:11657814-11658779	III	WTKYGQK	867	288	31447.8	7.61	54.41	56.11	-0.681	no	nucleus	ATGGCGTCACTAGCCACTCCATCCGCCGCTTCTACGGCGCTGGTGACCGAGATGATGGCGAAGGGACGCAAGTCAGCCGCGGCCCTCGAGGCCCTGCTACCGCTCCAGGACCACGCCGGCATCCGGGAGCTCACCGCCGATATCCTCCGCTGCTGCGATCGCGCCCTCGCCGCGCTCCATGACACAGGCCGGAAGAAGCGCAAGTCGTCGCCCGACGGCAGCGCAGCCACTCAGACAACCAGGCCCAAACGAAGGACGCGCGCGAGCCGCGGAGAGACGGCGGCGGCGACGACGAGGGTGGAGAGGAAGCGGAACTGGGACGACGGCTTCCTGTGGACCAAGTACGGGCAGAAGGACATCCGGGGCAGCGGCCACCCGAGGCACTACTTCAGGTGCGCC…	MASLATPSAASTALVTEMMAKGRKSAAALEALLPLQDHAGIRELTADILRCCDRALAALHDTGRKKRKSSPDGSAATQTTRPKRRTRASRGETAAATTRVERKRNWDDGFLWTKYGQKDIRGSGHPRHYFRCAYKLDAGGCPARRQVQRSEEEEEDDPYLYVITYFGDHTCCHRGAEANATLDHVKTHYQSLVLGFGSAGGRSPRPDGDAWSGKTSRSAELAAEVAKVESTPSSDLWPSGPTEGLRSSANDVRCSSSPTSAAWDPSATADWDYFGNCSFDYLSEFFEL
HvWRKY84	HORVU.MOREX.r2.1HG0057150.1	1H:456896627-456899620	III	WRKYGEK	870	289	32272.8	5.58	66.98	60.45	-0.829	no	nucleus	ATGGCGATGCGGCCCAAGACCGAGATGTCGCCGCCGCCGGCGACCCCATCGCCCTCCGACCAGAGAGACGCTGTCATCGAGGAGCTCCGGAAGGGCTCTCAGCTGGCGGAGTTCCTCCGGCAGCAGGTGGAGCTCATCCCGGAGGACCGCTGCCGCGACGCTGCGCTAGCCAACGTGAGCAACATCTCTACGGCGCTAGCGTCGTCCCTCTCTGTGCTCCAGTCGGAGAAAGAGCAATACTGCTCCTCCTCTTCCTATGATCCTGGCCATGCTTCCGGCGCCTCAGGCGGCGGGGTGAGAAATGGCCCCGTGGCACGCTCCAGGAACAGGAAGGCGAAGCACCGGCGAGGCACCTATGGCGAGGACCTTCCAATCAAGGAGATACTAACTGAGGCACCA…	MAMRPKTEMSPPPATPSPSDQRDAVIEELRKGSQLAEFLRQQVELIPEDRCRDAALANVSNISTALASSLSVLQSEKEQYCSSSSYDPGHASGASGGGVRNGPVARSRNRKAKHRRGTYGEDLPIKEILTEAPENDRFHWRKYGEKKILHADFPRLYYRCGYSDEHKCPAKKYVQQQNSGDQPMFLVTLINDHTCDTLFPDEDQDQPPSSPSSANNSQVLDFSKASLSSAVGVSRLKEEEDADMSVTVPSYNYTYDELSSSSLPFLSPKQWEMEMDIKSLFRRHSGDGN
HvWRKY85	HORVU.MOREX.r2.1HG0057180.1	1H:456984109-456987947	III	WRKYGEK	873	290	31690.4	8.22	59.58	65.03	-0.603	no	nucleus	ATGGCGATGCGGACCAAGTCTGAGATGTCCCCGCCGCCCTCCGACCAGAGGGACGCTGTCATCGAGGAGCTGAGGAAGGGCGCTCAGCTGGCTGAATGCCTCCGGCAACAGCTCGAGCTCATCCCGGAGCTTGGTCGTCGCAACGCCGCGCTAGCCAATGTGAGCAACATCTCCACAACCCTATCTTCGTCCGTCTCAATGCTGCAGTCCGACAGAGAGCAGTACAGCTACTCCTCCTCCGACGCCAGGGCGGCGTCCTATGCTGCTGGCGCCGCCTGTGGCGGCCGCAGGAGCGGCGGCGGCGTCGGGGCACAAAATGGAGCCATTGCCCGCACTAGGAAGGCGAGGCACCGGCGAGGCATCCATGGTGAGGAGCTTCCAATCAAGGGGATACTAACT…	MAMRTKSEMSPPPSDQRDAVIEELRKGAQLAECLRQQLELIPELGRRNAALANVSNISTTLSSSVSMLQSDREQYSYSSSDARAASYAAGAACGGRRSGGGVGAQNGAIARTRKARHRRGIHGEELPIKGILTETPENDGFHWRKYGEKKILNAVFPRSYYRCGYSDEHECPAKKHVQQQNNSDPPMFIVTLFNDHTCSALFPANEQLPSTSNSATANSQVLDFTKASLSSAPGISRLKKEDGAGLSVTVPSYTYDELSSYSSLPLLSPTEWKMEMEIKSFFHHHTGGGS
HvWRKY86	HORVU.MOREX.r2.3HG0247800.1	3H:536772754-536775531	III	WKKYGQK	1083	360	39103.3	5.45	66.76	68.69	-0.396	no	nucleus	ATGGCATTTCAGCAAGAGGCCGTAGGAAAGCTGAGGGAGGAGCTCGGCCGCGGCTATAATCTCAGCGCCAAGCTTCTGGCGTTGCTCAACCAACCCAGCCACCTCCTCGATTGCCGTGCCCAGGAGATGGCTATGGCGATAAGCCAAGAGCTTTCTCAGGTGTTCAGGGCGTCTCTGTCGATGCTCAAGCCCGGCGATAGTAGTAGGGTGGCGGAAGGCAGGGCGACAGAGCCAGAGGCAGCGCTCACAGAGGATAGCATCGGCCAGCCCACTCCGGCGAAGGATAAACGCATCAGTGGAGATGAGGTTACTCCCCCAAGAATTGGTAAAGAAGAGGAGATTACAGCCGAGCCTTACAAGGATGGCTACAAATGGAAAAAATATGGGCAAAAGAACATT…	MAFQQEAVGKLREELGRGYNLSAKLLALLNQPSHLLDCRAQEMAMAISQELSQVFRASLSMLKPGDSSRVAEGRATEPEAALTEDSIGQPTPAKDKRISGDEVTPPRIGKEEEITAEPYKDGYKWKKYGQKNIKNRKFARLYFRCMHSHERGCWAKKQLQQEDSSIGSPPLYKVTYLNDHTCHQVFPIVNITSANLPATSTTTRNGAQFAPACRHLHDGGNGELEDIIMTSTFTTVIGGAAYAAPSSTPLPSLPPMDESPSDLASYEAGGGQSPSLLDLSLGLDEAMMDEMYFSCGSPFPPVEAPAAPWSLSSLPPLPPMEASSVGPAAYMPSRGGHSMSLDAMTMTEIFLWSSPLFSPR
HvWRKY88	HORVU.MOREX.r2.1HG0073700.1	1H:509093524-509095938	IIb	WRKYGQK	1779	592	61044.1	6.63	46.68	65.32	-0.389	no	nucleus	ATGGACCAGTCGTCCTCCTCGTCCTTCGTCGCCGCTGCCGCCGGCCTCAAGCGCAAGGCCAACGCCGCCCTCGGCTGCGGCAGGGAGCTGCCGTCGGAGGCCGCCGCCGCCGTCGGGCTGGCGGGGTACGACGTCGGCGACCAGCAGGAGCGCCGGGTCGTGGTCGGCGAGATGGACTTCTTCGAGACGGAGATGAGGAAGGAGAAGCGGGACAGGAAGGAACACGCCGCCGCCGACGACCTCGGCGTCATCAACAGCAACAAAGGGGCCGACCTCGGCATCGACATGGGGCTGCACGTCGGGGGCCGGAGGAGGAACAGCGGCAGCGAGGAGTCCACCGTCGACGACGGCGTCTCCTCCAACGACGACGACCACAGGGAGGCCAAGGCCGAGCTAGCG…	MDQSSSSSFVAAAAGLKRKANAALGCGRELPSEAAAAVGLAGYDVGDQQERRVVVGEMDFFETEMRKEKRDRKEHAAADDLGVINSNKGADLGIDMGLHVGGRRRNSGSEESTVDDGVSSNDDDHREAKAELAAAKSELARVNEENKRLKTMLANANTKCSSLHMQIALMQQQQQHQRSSHGHAHAHQFDPDKREQQLLLDAGSHTQLVPRQFMSLGSSSSPDEPRPARGSDASPSSNPLLAVGPDGAMDYAGCHGNVGAGKADLMPLPSFEHHGHHERGGSPEAMQGWLPSKVPKFLPAAKGPEPPPPEAAAAAATMRKARVSVRARSEAAMISDGCQWRKYGQKMAKGNPCPRAYYRCTMAAGCPVRKQVQRCAEDRTVLITTYEGNHNHPLPPAAM…
HvWRKY89	HORVU.MOREX.r2.3HG0226770.1	3H:386511064-386513166	IIc	WRKYGQK	1011	336	36847.9	7.89	58.58	46.13	-0.933	no	nucleus	ATGTCTTCTGGTGGTGGCGGGGGAGGGGATCAAGGCCGTCATGGCGTCTACCACCAGCATGGCCACGGCCAACTCACCCGCAACGATGGCGCCGGTGGCTACGAGTTCAGCAACGACGACATGGAGAGCTTCTTCTTCAACCAGCCTGAGGGCGTCGTCGGTGGTGTGCGCGCCGACGAGATCGAGCCGTACTCGAGCCTCACGAGCTACCTGCAGGGCTTCTTGGACCCCACCGGGCTAGCTCGGCATCTCGACGTGCCGGCCAAGCACGAGCTGTCGGTCGACGTTAGGACCCATGACCAAGACAGCCAGGGCACCGGCAGCGCTGCTGGCGAAAGCGCTCCGCTGCTAACACCCAACTCATCCGTATCTTTCTCGTCCGGAGGCGGGGACGGCGAG…	MSSGGGGGGDQGRHGVYHQHGHGQLTRNDGAGGYEFSNDDMESFFFNQPEGVVGGVRADEIEPYSSLTSYLQGFLDPTGLARHLDVPAKHELSVDVRTHDQDSQGTGSAAGESAPLLTPNSSVSFSSGGGDGEGKSHRSKKGRAQEADNQEDGESSKKANNKPKKKAEKRPRLPRVSFLTKSEVDHLEDGYRWRKYGQKAVKNSPYPRFLYTSFVSKNKSL
HvWRKY90	HORVU.MOREX.r2.7HG0562250.1	7H:158085067-158087509	I	WRKYGKK	1866	621	66798.3	8.05	49.31	63.96	-0.673	no	nucleus	ATGGCTGGGACCAGCAACAGGCGTGGAGCAGTAATGGAGGATTGGATGCTCTCCACACCCAGCCCAAGAACACTCATGTTGAGCCTGTTCAACGATGATTTCAGCTCGAGTCCCTTCTCCGATGTTTCCGGTGACAGTGGCAGCAACAAACCTCGTGATGGAACCGAGAGAACCAAAGCTTCCGTCGATTCGAGCCTGGGAGAAAGTTCTCGAGTTAACAAAACCTCTCTCCATTTTGAACCAAACCTGTTTGGTGCTGATGAGAAATCAAGCCCAGATAATGGCAGTCCTGCAGAAAGGAACGGTTTCTGTGCACTCAAGATCGACACTTCCCGTGTTGGTTTTTCCGCGTCGATTCGGTCTCCTATCATAATTCCACCCGGCGTGAGTCCAAGGGAA…	MAGTSNRRGAVMEDWMLSTPSPRTLMLSLFNDDFSSSPFSDVSGDSGSNKPRDGTERTKASVDSSLGESSRVNKTSLHFEPNLFGADEKSSPDNGSPAERNGFCALKIDTSRVGFSASIRSPIIIPPGVSPRELLESPVFLPNAIAQPSPTTGKLPFLMRTNANTTIPSVHKKAQELSHDDHTISFQQILRSNTTFSIVDNEGPNVIHQNQPSASENNHRIPNSEQEDIKANRNGDDSPATIIVRAEDGYNWRKYGKKQVKNSGHPTNYYKCSHQNCPVKKKVEHCQDGDITEIVYKGSHNHPLPPPDRRPGVVACSRPNDLQADGAENAPADHFQDAHGEVPATNLCASLNRAGLADRSATREAIDISPPTLSGEDSKREAHGTVSSGIERDKDLAES…
HvWRKY91	HORVU.MOREX.r2.1HG0076340.1	1H:514983804-514984762	IIe	WRKYGQK	885	294	31760.2	6.11	47.73	60.48	-0.634	no	nucleus	ATGGACGCCGACGACTGGGGTCTCGGGGCGGTCGTGAGGAGCTGCGGCGGCACTGTCGTCTCCGGCTACGAAGCGGAGTCTCCTCGCCGAGAAGCCGTGCGTGCGCGGGATGATCCGGCCGAGTTCGTGCGGCGACCGGCGAGGGCGGCGTCCACGCCGTCGTCCCTGTACGACGTGCTGGAGTACCTTGACCTGGAGCACGAGCAGCTGCACCAGAGGGCGCCGTTTTCTATCACGCCTTCGTCCGGCAGTGACCGCGCGCCGGATCATCACGAGGTGCTCATCTCCTTCCCTGCAGCCGCTGCCTCGACGTCTGGGCAGGCGCTGCCGGTGAAGAAGCAGGCCGGACGGAAGCCGGGAGGTGCTGGAGCCGTCCGGCGGCCGAAGAGAGGCAAGAGC…	MDADDWGLGAVVRSCGGTVVSGYEAESPRREAVRARDDPAEFVRRPARAASTPSSLYDVLEYLDLEHEQLHQRAPFSITPSSGSDRAPDHHEVLISFPAAAASTSGQALPVKKQAGRKPGGAGAVRRPKRGKSKKSQMKKVVREVPMAEGGVNGPDDQWAWRKYGQKPIKGSPYPRGYYKCSSMKSCTARKLVERSTAKPGVLLVTYIADHCHAVPTTISALAGTTRNPPQSPASDDTALNRGDDSADVSSSAAGADDESELWSPVDMDDFFASFDDEFDNFFEDDALGRRVSL
HvWRKY92	HORVU.MOREX.r2.6HG0457980.1	6H:28643700-28646270	III	WRKYGQK	1152	383	40375.2	8.26	48.53	64.86	-0.368	no	nucleus	ATGCACGTCCTTGCACCGCACTCAGCCGGTCCTCCGTTTGCACCGCTACTCGCCGGCCGTCGTGAAGGCAAAGGCATCGCGACCCTGCACGGTGACCAGCTGGGAGGGATGGACGACGTGGTGTCGCAGATCGGCGAGGCTTTCCGGCTCGCCGGGGAGCTCATGGGCGACCTCCCGACGGCGACCCAGAACGACCCGGCCTACCTCGCCGCGCGCTGCTACGGCATTGCCCGCGCCTACAACACGGCCATCCGCATGCTGCAGCACTACGGCGCCGGCGCCGTGCCCGCACAGCGGCCGCTGGACCTCCTGCGCCCGCGCGGCACGGAGGAAGCTGCAGCCGGCGCCGCCAGCCAGGTTCTCGGGGAAGCCGCGACGACGACGCATCTGCAGGAGCCA…	MHVLAPHSAGPPFAPLLAGRREGKGIATLHGDQLGGMDDVVSQIGEAFRLAGELMGDLPTATQNDPAYLAARCYGIARAYNTAIRMLQHYGAGAVPAQRPLDLLRPRGTEEAAAGAASQVLGEAATTTHLQEPFQTPAVARAPPHAVADVAGTSGGPVRRLASSRSPPPAQPRQGRRRRDSGHRETMLVPAHRVGNTEIPPDDGYTWRKYGQKDILGSRFPRSYYRCTHKNYYGCDAKKKVQRLDDDPFMYEVTYCGSHSCLTSTTPLLNFPTATATATNSPTAATGSSGLARADQFMAPAEQVAVSTSMHLGVGWMPVSFQGVVAGSGAGRGSGADMLTNVSTAARDTDYPALDLADVMFNSGGGTGIGMDGIFSSHHRSDG
HvWRKY93	HORVU.MOREX.r2.5HG0384220.1	5H:326127677-326128979	III	WRKYGQK	954	317	34996.3	6	57.8	71.39	-0.544	no	nucleus	ATGAAGCACATCAAGAAAAGCAGCAGCTCGTCCAGGCTTTTCTGCGACGACGACCGTTCAGCGGCGGCGTTGAGGGAGATGGCCAGGGAGCAGTCCCTGGTGACGCAGCTCCGGGCTGTCGTGCTGCCGGCGATCCAGCTAGCCGGCGGCGAGCGTGCCGAGGTCGTCGCCCAGATGTTCGAGAGCATACTTGACTGCTCGGCCAAGGCCATAGCCGCGCTCAAGCTTCTTCGGCTCGATCATTCTCAAGTTGATGATGAAGTGCTGCTGACGGCGATGGTGGACGACAAGACGAGAGTCAGGAAGATCGTCCCCGGTGACGGAGGAAAGGACGGCGACGACAATGCCAAGCCCCTTCGCCGTCAGCGCAAGCGAAGGAGATTAGGCGATGACTCCGTG…	MKHIKKSSSSSRLFCDDDRSAAALREMAREQSLVTQLRAVVLPAIQLAGGERAEVVAQMFESILDCSAKAIAALKLLRLDHSQVDDEVLLTAMVDDKTRVRKIVPGDGGKDGDDNAKPLRRQRKRRRLGDDSVALETPVPHYDGHQWRKYGQKIINHTKHPRSYYKCTYKQEQDCKATKTVQQQQQQQDGGIEDEPVMYAVVYYGQHTCKPGQTDAAVVQTASSGRFGEGGGEELARSNSCSNISVTCSSVVVDNHQLMTASLESCCNLLDMAGDMATAEVNQYDQLFDVASFSPFDSGTAWAMDVSEHGLQKFGGW
HvWRKY94	HORVU.MOREX.r2.5HG0360620.1	5H:50881472-50882332	IId	WRKYGQK	861	286	30740.8	9.83	47.53	57.06	-0.58	no	nucleus	ATGGCCGTCGACCACATGGGATGCCGCTACGCCACGCATGGGCACGCGGCCGAGGAGCAGTTCCAGGAGGCCGCTGCCGCGGGGCTCCGCAGCCTCGAGCTCGTCCGCTCGTCCTTCTCCTCCCGTGCCGGCTGCGCGCCGCCGCCCCTCGGAGAGATGGCCGACCAAGCGGTGTCCAGGTTCCACCGGGTCATCAACATCCTCGACCGCACCGGCCACGCCCGCTTCCGCCGCGGCCCTGTTGGAGATGCCGCCGACTCGTTGACTCCCTCTCCTGTCTCTTCTCCTCCTCCGACGCCGGCCCAGGGACCGGCAGTCTTGCTGCAGCTGGCGCCGCAGAAAAGCATGACGCTGGACTTCACGAAGCCTTTGAAGGCGCCGGCCGCCCCTTCCGTGACG…	MAVDHMGCRYATHGHAAEEQFQEAAAAGLRSLELVRSSFSSRAGCAPPPLGEMADQAVSRFHRVINILDRTGHARFRRGPVGDAADSLTPSPVSSPPPTPAQGPAVLLQLAPQKSMTLDFTKPLKAPAAPSVTSTSFFSSVTAGGEGSVSKGWSQLVSSGKPPLPAGTKRKQRQQQTRFAHSDTAAGARCHCLKKGKHRVKYTTLEPTVTSRAVDVPGVGDKYSWRKYGQKTIKGSPHPRCYYRCGTVKGCPARKHVERATDDPAMHLVTYEGDHRHDTWPPAAAN
HvWRKY95	HORVU.MOREX.r2.1HG0057190.1	1H:457119113-457120125	III	WRKYGQK	903	300	32305.8	5.15	53.15	68.43	-0.398	no	nucleus	ATGGCGGCACTTGTCACTCCAGCAGCTTCGGTGGCGTCCGAGCTGGTGGCGCGGGGCCGGGAGTCCGCGGCCGTCCTCGAGGCCCTGCTCGACGACGCGTCGACGCAGGGGCACGGCGGGATCCGGGAGCTCGCCGCGGAGATCCTTCGCTGCTGCGACCGCGCCCTCGCCGCGCTCCACGGCGCGCCCGCCACCAGCAGGAAGCGCAAGTCGGAGCCCGACGGCGCCGCCGCCGCCCAGACGAGGCCGAGAAGAAGGATGCGCGCGAGCAGCGGACTGACGGCGGCGAGGGTCGAAAAGCGGTGGACGGCGGAGGACGGGTTCATATGGAGGAAGTACGGGCAGAAGGAGATCACGCACAGCAAGAACCCGAGGCTATACTTCAGGTGCACCTACAAG…	MAALVTPAASVASELVARGRESAAVLEALLDDASTQGHGGIRELAAEILRCCDRALAALHGAPATSRKRKSEPDGAAAAQTRPRRRMRASSGLTAARVEKRWTAEDGFIWRKYGQKEITHSKNPRLYFRCTYKHDSGCPATRQVQQSDDDHSLYIITYFGDHTCCQGDDGAVAAAEEEDVKMQPFVINFGSATTASSTSGSPWQNSDDIDGRSEISRSPQAVCLPEGGGDELRVKVTKVETTSSDSQTAGPTAAHLSPSAEVSCASPAWDPLSICLEWDQFVESSFDFVSEFINFDGIVL
HvWRKY96	HORVU.MOREX.r2.5HG0389690.1	5H:373313659-373315086	IId	WRKYGRK	546	181	19630.3	10.53	50.15	58.78	-0.645	no	nucleus	ATGGCCGCCCCGGTCCCGCAGCCGCAGAGCCTCACGCTGGACTTCACCAAGCCGAACCTGACCATGTCGGGCGCGACGTCTATGACGTCTACGTCCTTCTTCTCGTCGGTGACCGCCGCCGAGGGGAGCGTGTCCAAGGGCCGCAACCTGGTGTCCGCCGGCAAGCCGCCGCTGTGTGGGCACAAGAGGAACCCCTGCGCCGGCGCGCACTCGGAGGCCAACACCACGGGCAGCCGATGCCACTGCTCCAAGAGAAGGAGGAACCGCGTGAAGACGACGGTGAGAGTGCCGGCGGTGAGCGTGAAGATCGCTGACATCCCGTCGGACGAGTACTCATGGAGGAAGTACGGCCGGAAGCCCATCAAGGGATCCCCTTACCCACGATCCAGTGAAGCGCTG…	MAAPVPQPQSLTLDFTKPNLTMSGATSMTSTSFFSSVTAAEGSVSKGRNLVSAGKPPLCGHKRNPCAGAHSEANTTGSRCHCSKRRRNRVKTTVRVPAVSVKIADIPSDEYSWRKYGRKPIKGSPYPRSSEALPMSRQQTSASFGGERDLWGHSITGEEGRQMRGRLLAEKKANQLLTRIV
HvWRKY97	HORVU.MOREX.r2.4HG0285360.1	4H:38475209-38475911	IId	WRKYGQK	462	153	16311.4	10.33	54.93	47.25	-0.709	no	nucleus	ATGGCCGCCCCTGTCCCGCAGCCGCAGAGCCTCACGCTGGACTTCACCAAGCCGAACCTGACCATGTCGGGCGCGACGTCCGTGACGTCCACGTCCTTCTTCTCGTCGGTGACCGCCGCCGAGGGGAGCGTGTCCAAGGGCCGCAGCCTGGTGTCCGCCGGCAAGCCGCCGCTGTCCGGGCACAAGAGGAAGCCCTATGCCGGCGCGCACTCGGAGGCCAACACCACGGGTAGCCGATGCCACTGCTCCAAGAGAAGGAAGAACCGCGTGAAGACGACGGTGAGAATGCCGGCGGTGAGCGCGAAGATCGCCGACATCCCGCCGGACGAGTACTCGTGGAGGAAGTACGGCCAGAAGCCCATCAAGGGATCCCCTTACCCACGATCTAGTGAAGCGCAG…	MAAPVPQPQSLTLDFTKPNLTMSGATSVTSTSFFSSVTAAEGSVSKGRSLVSAGKPPLSGHKRKPYAGAHSEANTTGSRCHCSKRRKNRVKTTVRMPAVSAKIADIPPDEYSWRKYGQKPIKGSPYPRSSEAQPMSGQQTSASFGGERNLWGP
HvWRKY98	HORVU.MOREX.r2.3HG0213770.1	3H:211225314-211226016	IId	WRKYGQK	462	153	16189.3	10.18	51.72	49.15	-0.657	no	nucleus	ATGGCCGCCCCGGTCCCGCAGCCGCAGAGCCTCACGCTGGACTTCACCAAGCCGAACCTGACCATGTCGGGCGCGACGTCCGTGACGTCCACGTCCTTCTTCTCGTCGGTGACCGCCGCCGAGGGGAGCGTGTCCAAGGGCCGCAGCCTGGTGTCCGCCGGCAAGCCGCCGCTGTCCGGGCACAAGAGGAAGCCCTGCGCCGGCGCGCACTCGGAGGCCAACACCACGGGCAGCCGATGCCACTGCTCCAAGAGAAGGAAGAACCGCGTGAAGACAACGGTGAGAGTGCCGGCGGTGAGCGCGAAGATCGCCGACATCCCGCCGGACGAGTACTCGTGGAGGAAGTACGGCCAGAAGCCCATCAAGGGATCCCCTTACCCACGATCCAGTGAAGCGCCG…	MAAPVPQPQSLTLDFTKPNLTMSGATSVTSTSFFSSVTAAEGSVSKGRSLVSAGKPPLSGHKRKPCAGAHSEANTTGSRCHCSKRRKNRVKTTVRVPAVSAKIADIPPDEYSWRKYGQKPIKGSPYPRSSEAPPMSGQQTSASFGGERDLWGP
HvWRKY99	HORVU.MOREX.r2.4HG0314970.1	4H:403727598-403728861	III	WRKYGQK	897	298	31411.9	6.52	42.78	69.13	-0.3	no	nucleus	ATGGCATCTTCGGACAGCGCGGGGAGAGACTTGCCGGCGGCGAGGGCGGCCGCGGCGGTAAACGACCTGATCGAGGTGCGCGAGGGGGCGATGAGGCTGAAGGGCATGCTGCAGGAGCAGTCGTCGGGTTTTGCAGAGCTGATGGACGGGATACTAAACAAGCTGTCCAGCGCTCTGTCGGCGTTGGACACCGGCTGCACGGCCGGAGCATCCGCGTCCGGGGCGTCCGATGGGGTGATCAGGGCGAGGGCGGAGAGCTCGACCGGGAGGACGAGGAAACGCAGCTTCAGCAGAAGATTAGAACGCTCATCGGGCAAGCGAGTAACTGACACGCTGGTTGATGGTCACATATGGCGGAAATATGGGCAGAAGGAAATTCAAAACTCAACTCATCCGAGG…	MASSDSAGRDLPAARAAAAVNDLIEVREGAMRLKGMLQEQSSGFAELMDGILNKLSSALSALDTGCTAGASASGASDGVIRARAESSTGRTRKRSFSRRLERSSGKRVTDTLVDGHIWRKYGQKEIQNSTHPRSYYRCTHKSDQGCNAKRQVQICETHPIKYAVTYYGEHTCKAPSNTPMIIVPASGDRADNLVSFAPTLPQLLPATTQLSSSWCTSVDDVFSSSSDPFVQADELAVIVGSAGKTSSTVGSVPDYSGSGIGDMARGGTGSFASSPSSLGFVVGSLGSIVDDDFFQFDP
HvWRKY100	HORVU.MOREX.r2.3HG0247770.1	3H:536299958-536305035	III	WRKYGQK	801	266	29538.3	5.81	67.09	42.26	-0.923	no	nucleus	ATGGCGTCACCGCCGCACAAGAGGGAGTCGTTTGACTTCGCGGATCCACCCGCGCAGGAGGCCATGGGATCTGCCTCCGCGTCCTACAGCCCTCCCGGAGGCGTCTTCGGCCTCTCCGCGCCGGAGTCATCGCGTCGCGACAGCCGAAAGAGAAGGAAAGACAGACCTTCATGGGTCAAGAATACGTTCACACCTCATTTTGACGGTCACCTGTGGAGAAAGTACGGCCAGAAAAACATCAAGGACTCTGTCTTCCCCAGGCTTTATTACAGATGCTCTTACCGTGAAGACAAGCAATGCCTTGCCTCGAAGCTGGTGCAACAGGAGAACCACGAGGACCCACCGCTGTTCAAGGTCACCTACACGTACGAGCACACGTGCAACAGCGCTCCCGTCCCA…	MASPPHKRESFDFADPPAQEAMGSASASYSPPGGVFGLSAPESSRRDSRKRRKDRPSWVKNTFTPHFDGHLWRKYGQKNIKDSVFPRLYYRCSYREDKQCLASKLVQQENHEDPPLFKVTYTYEHTCNSAPVPTPDVVAELPAPATGDALFLRFDSTGAGHRDAHRIEQERHYQQPAAPGSGWPSMMLSFDSNSQQHEQCTFPSELPPAASSSFSTEGLPAPPSTTDGGGDGFSTWDSLRYGLNDHVHFGDHPYLPNSGNDGDDNY
HvWRKY101	HORVU.MOREX.r2.3HG0238260.1	3H:480077274-480082595	IIc	WRKYGQK	696	231	25347.3	6.65	46.34	52.47	-0.828	no	nucleus	ATGGATGATCTCCACGGAGACGACGAGGCGCACACGTTCCCTCGCTTCCCCTACTTCTCGGCGCCGTCGGCATCGCCGCCACTCGCGTCACCGCTGGCCTCGTCGTCGAACGATCAGCACCACAGCCCGCTCGCCGCAGCGCTCCAGCAGCTGACCCCGCCGCCGTGGCCGTGTTCTCCTCCTGATCTGACCCCTCAGCCGATGCTGCCGGCGATGGTGGAGTTGGACTGGTCGTCCATGTTCCAGATGGGTCCGGTGGCTCCGCCAGAGCAGAAGGAGGAGCAGGCCGCGCAGGCGGATCGGACTCAGGGCGGGGAGAACGACGGCGAGGCGGGTGGCAGCGGAAGTGGTGGCAAAGACAGGGAGAAGGCGGAGGGAAGCGCGGGGAGATCGGGGAAG…	MDDLHGDDEAHTFPRFPYFSAPSASPPLASPLASSSNDQHHSPLAAALQQLTPPPWPCSPPDLTPQPMLPAMVELDWSSMFQMGPVAPPEQKEEQAAQADRTQGGENDGEAGGSGSGGKDREKAEGSAGRSGKKKVSKPRFAFQTRSENDILDDGYRWRKYGQKAVKNSSNPRSYYRCTHPTCNVKKQVQRLAKDTAIVVTTYEGVHNHPCEKLMEALGPILKQLQFLSQF
HvWRKY102	HORVU.MOREX.r2.2HG0161240.1	2H:618680134-618683927	IIe	WRKYGQK	1536	511	53638.6	5.98	47.22	50.49	-0.594	no	nucleus	ATGTGCGACTACTTCCTCCAGAGGATGGAGGGCGACCAGGCCGGCGGCGGGGACCTCACAGACATCGTGCGGGCCGGCGGCGCCATGCCGGGAAACAACGACGGCGACGGCAGCAACATCCCGTCAACGGCCGCCGAGTGGCAGCTGCAGCCGGCCGACCAGCCGATGCTGTTCCCGCCTCCGCCCTCCTCGTCGTCGCCGGGGACCGGCGGCGATGTCTTCGGCGACCCTTTCGCGGGGCTCGGGGACCCGTTCAGCAGCGACTATTCGTCGGGCGCCCCCGAGTTCCTGGAAGGCATGCCTGACGCCATGGCCAAAATCGGCTTCGAAGCGGGCGGCGGCGGCGGCGTCGTCACCGGCTGCGGAGGAGGCGGAGGCGGTGGCCAGATGTTCGACATG…	MCDYFLQRMEGDQAGGGDLTDIVRAGGAMPGNNDGDGSNIPSTAAEWQLQPADQPMLFPPPPSSSSPGTGGDVFGDPFAGLGDPFSSDYSSGAPEFLEGMPDAMAKIGFEAGGGGGVVTGCGGGGGGGQMFDMGRKPLLPRGMQMMPAGIGGGMGPRLMQSSLSPIAIRPYPAMTPGDMVKLGITAGQAAGCAIDAAVAGMQMSSPRNNNGGIKRRKNQARKVVCIPAPTTAGSRPTGEVVPSDLWAWRKYGQKPIKGSPHPRGYYRCSSSKGCSARKQVERSRTDPNMLVITYTSEHNHPWPTQRNALAGSTRSHHGKNGGGGGSGSGSKSSHNEKQPQNQNVKEERKDHRAASATTTATMTTSTVTTTTSTSPVVVKEETLAGSSSEAQARDHRAID…
HvWRKY103	HORVU.MOREX.r2.1HG0048240.1	1H:406496976-406501601	III	WRKYGQK	1056	351	38202.2	9.12	43.85	66.5	-0.448	no	nucleus	ATGGATGACGCGCTGTCGCAGATTAGCGAGGCGTTCCGGCTCGCCGGCGAGCTCACGGGTGAGCTCCGGGCGACCCAGAAAGGCCCGGCCTACATCGCCGCACGCTGCCACGGCATCGTCCATGCCTACAACAGAGCCATCCGCATGTTGGAGCGCTACGGCATGGGCGGCGTGGCCGCAGCCGCGCCACGTCGGCTGGACGCCGGGCCGCTGGACACCCCGCGCCTGCGCAGCACGGATGAAGCCGTCGCCAGCCAGTTTCTCGGAGATACTCCGACGCATTTGCCCCACCGGCAGGAGCCATTCCACATGGCGGCCGGCGTGTTGGGCGCGCGAGTAGCGCCACCGCATACGATGTGCGCGGCTGCGGGCACGTCCGGTGGCCCGATGAGGAGGCTG…	MDDALSQISEAFRLAGELTGELRATQKGPAYIAARCHGIVHAYNRAIRMLERYGMGGVAAAAPRRLDAGPLDTPRLRSTDEAVASQFLGDTPTHLPHRQEPFHMAAGVLGARVAPPHTMCAAAGTSGGPMRRLPSSRSPPPVQPRQGRRRRESGQKELVLVTAQGTGNTELPPDDGYTWRKYGQKDILGSRYPRSYYRCTHKNYYGCDAKKKVQRLDKDPFMYEVTYYGDHSCLTSTTPLLVLPTTSVTTSAASSPNAMTGANLSIKDLPMVSAEQMQSTTLSTSVDLRISSMPPSFQGILAGSGTRVGSNTNARMNVSTITKDMDYLTLDLMDVMFSSGYNMDGIFSSYD
HvWRKY104	HORVU.MOREX.r2.2HG0081000.1	2H:5817782-5819595	III	WRKYGQK	756	251	27939.5	7.07	59.84	82.75	-0.473	no	nucleus	ATGGATAACAAGATGACCAGCAACAGCATGACGGTCGTCCATGGTGGCTCGGAGATGGACGCGTTGCTTAGGCGGCAGCAGGAGCTCGTGGTTCAGCTCCGAGCGATCATCCTTCCGGCACTTTGCGACGCCGACAGCAGGTCAGCCGACCTCGCCGTCGACCTCTTCGATGGTGTTATCGGCTGCATCACCGGGGTCATATCCAAGCTCCAGAGTATCACTACCGCAGGCTGTGAACCAGCGGCCATCCTCGGCGACGTTATCTCCAACGGCGCCGGCGAGGGACAAGAGAAGAAGCCCGTGATCAGGAACGCTGGTCAGAAGAGAAGGAGGAACAACGAAAAGCGGTCAAGATCACTTGTAACAATTGTTCCACATTACGATGGCCATCATTGGAGA…	MDNKMTSNSMTVVHGGSEMDALLRRQQELVVQLRAIILPALCDADSRSADLAVDLFDGVIGCITGVISKLQSITTAGCEPAAILGDVISNGAGEGQEKKPVIRNAGQKRRRNNEKRSRSLVTIVPHYDGHHWRKYGQKNINGRQHARTYYRCAYTKRNCSATKTIQRQDHNGSLNCEDETAKYIVVYYGHHSCRADITRNVANIDPSVDLIQSGKMAGAVTDFEKFDQQDLDVSSLIEVFDNPELNWDIIC
HvWRKY105	HORVU.MOREX.r2.2HG0091840.1	2H:36845477-36848149	III	WRKYGQK	1059	352	36761.7	7.16	55.72	55.74	-0.393	no	nucleus	ATGGCGTCTTCCGGCGGCGGGCGCTCACCGGTGACGGCGGTCTTAGACGACCTGGTCGATGTACGCGACCGCGTGGCGGTGCTGCAGACCGTGTTGCACGAGTCTTCGCCTGGGCCAACGACCGTGGAGGCGGGGGAGCTGGTGGACGGGATGATGGCCAAGCTGTCGAGCGCCTTCTCGGTCGTTCTCGGCACCGGCGATGGTGGCGTGGCGTCGTCGTTGTCAGGAGCAGGCCGGGGGCCGAGCGGGAGGAGGAAGAGACCCGGCGCGGCGTCGTCCGGGCCGCACCGCCGGAGCAGCCCGAGGGGAAGGATGAAGAGCCCTCTAAGCAGGACGGTCACCGCTACGACGCTCACAGATGGCAAGTCATGGAGGAAGTATGGACAGAAACAGATACAT…	MASSGGGRSPVTAVLDDLVDVRDRVAVLQTVLHESSPGPTTVEAGELVDGMMAKLSSAFSVVLGTGDGGVASSLSGAGRGPSGRRKRPGAASSGPHRRSSPRGRMKSPLSRTVTATTLTDGKSWRKYGQKQIHDSTNPRSYYRCTHLPDQGCKAKRHVQQSESNPTEYTMDYYGQHTCRDPSTFPSLIVQSAAAAPPPDCANLISFAPINGANSGFTASTSTSAFAHHLMKEAADHHPMLFSRFSNYYSSSPPAQEGVSSGSPSPACHGKFMQYGAGGQFINVTGLRTSPLTVGSAPAEYWPVVGVAGVDMDAGAGMDSFPSPPSSPGFLSGSLEGSFGNNVCDDDLFSFDS
HvWRKY106	HORVU.MOREX.r2.2HG0091890.1	2H:37045408-37048038	III	WRKYGQK	1047	348	36520.3	6.75	64.85	55.55	-0.44	no	nucleus	ATGGCATCTTGTGGCGGCGCGGGCGATGACGGCGGGCGCTCACCGCCGGCGGCAGTCTATGACGACCTGGTGGAGGTGCGGGAGCACGCGGCGACGCTGCACAGCATGCTGCAGGGGTCGCCGAGCGTGTCGGCCGTGGACGCGAGGGAGCTGATGAAGGGGATGATGGCCAAGCTGTCCAGCGCTATGTCGGTGCTGGGCACCACCAGCGGCGGCGTGGAGGCGTCTTCGGAGGCTGGTGGTCGGGGTCCAGGTGGGAGGAGGAAGAGATCGGGCACAGTGTCCGGGCCGCACCGCCGGAGCACCTCCAGGAGAAGGTCGAAGAGCCCTTTCATCAACATGGTCACTGCTAGGACGCTCAACGATGGCAAGACATGGAGGAAGTACGGCCAAAAATGT…	MASCGGAGDDGGRSPPAAVYDDLVEVREHAATLHSMLQGSPSVSAVDARELMKGMMAKLSSAMSVLGTTSGGVEASSEAGGRGPGGRRKRSGTVSGPHRRSTSRRRSKSPFINMVTARTLNDGKTWRKYGQKCIHACTNPRSYYRCSHKPDQGCQATRQVQESDSNPSEYLISYYGQHTCKDPSTFRSLIIQGAADAAPPEDLPNLISFTSINGAAAASTSSSPNHLVRDATDLHSMLFSRFSNYSSSPPVQEGVSSSSPSPSFHGEFTQYAGGQLVDVIGRRTSPLTVGSAPAEYWPVVGIAGVDTDAGAGMDSFPSSPSSLGFMSGSFGGSFGNNVCDDDLFGFDS
HvWRKY107	HORVU.MOREX.r2.2HG0167730.1	2H:637309653-637312669	III	WRKYGQK	1089	362	38849.5	5.46	59.01	60.14	-0.461	no	nucleus	ATGGCCTTCGGGCTAGAGGCCATAGAACAACTATCGCAGGAGCTCGCCGGCGGGTATAATCTCAACGCGAGGCTCCTGACGTTGCTGCGCGGCGGCCCCCTCGATGGACGTGGACAGGAGAGGGCCGAAGGGATGAGCCAGGAAGTCTCCCGGGTGTTCATGGTGTCTCTGTTCATGCTCAATTCTCGAGAGAGCGGCAGACCGGTGGTAGACACGATGGCATCGCCAGCGGCAACGATCACTGAGGGTAGCATCGATGAGCGGGCTCCGGCAAAGGACATGCGTGTCTGTGGCGGAGAAGAGGTTACTCCCCCCAGGAAGGGCAGAGAAAACGAGGTTACAAAGAAGGAGATTACAGCCTCGCCTCACAGTGATGGTTACCAATGGAGAAAATATGGA…	MAFGLEAIEQLSQELAGGYNLNARLLTLLRGGPLDGRGQERAEGMSQEVSRVFMVSLFMLNSRESGRPVVDTMASPAATITEGSIDERAPAKDMRVCGGEEVTPPRKGRENEVTKKEITASPHSDGYQWRKYGQKNIQKWKFARCYYKCMFSHDRGCRAKKMVQQQNSSCGDRPMFHVTYVHEHNCQREAVSPGEATRSGHFNPQPQRAELDDDTMASCLAMVIGGAAPAGPSSSSLSPPPVGASPSDHDGGRTSSPLDVSTGLDVETSRGSPFDRLNAPAAPSSSSSLLPVEAISSSDPAVYMPAGGGLSTSTDVIAMDDIYFPCGPLFSPVAARPIGRSDDVPMDVAMFTDTTSAWTPYS
HvWRKY108	HORVU.MOREX.r2.5HG0384230.1	5H:326172884-326173980	III	WRKYGQK	801	266	29894.1	5.3	53.08	79.85	-0.654	no	nucleus	ATGGATCATAGCAAGAACTGCGGCCATGGCCTCACGGAGATCGTGGCGCTCATACAGCGGGAGCAGGAGCTCGTGACGCAGCTCCGGGCGCTCATCCTTCCACAACTCCACAACGTGGATAGCAGGTCGGCCGAGCTCGCCGTCCAGCTCTTCGACGACGTGATCGGCTGCAGCACCAGCGTCGTAACAAAGCTCTTCAGTGCTGGAAGTGGAAGTCGAGCGACCATCGAGGTCATCGACGACAAGTCCTTGGTGAGGAAGAACAGTACTAGTACTGCTGCTGCTGATATCGATGACAAGATGGAAGAACAGGCGAGGCCTAGTTCCATCGTTGGTCGAAAGAGAAGGAGGAACGACGACAAGCAATCAAGATCACTCGTGACCAATGCTCCGCATTAT…	MDHSKNCGHGLTEIVALIQREQELVTQLRALILPQLHNVDSRSAELAVQLFDDVIGCSTSVVTKLFSAGSGSRATIEVIDDKSLVRKNSTSTAAADIDDKMEEQARPSSIVGRKRRRNDDKQSRSLVTNAPHYDGHQWRKYGQKNINGRQHARSYYRCTYTERNCSATKTVQQQDQDGGSSIYSTDDCEVRGAKYTVVYYGDHTCKDGDNISNNIIDHLPNLVDIDLPRGETERVTEEISEFEVDLDVPALLEVFNNSQLNWEIVC
HvWRKY109	HORVU.MOREX.r2.3HG0185560.1	3H:10389201-10389794	III	WKKYGQK	483	160	18005.5	8.61	44.7	76.25	-0.541	no	nucleus	ATGCCCAGTCTCGAAAAGCTTGAGGTAAGAATCAATTCGCCGTACGGCGCTGCACCTATGGGCATCGAGCACCTATTAGGCCTCAAGGAAATCCTTGTAATTATTAGGGGTTATGGTGCCAATGGATCCAGCACAAGAGCTGCACTGTCGGCGTTAAGGAAGGCCATTGATACACGCTCAAGTCGTCCTACAGCTAACATTATGTGTGTTGACAATTCGCTGTTCCGTGGACTCCTCGACGACGGCTTCAGCTGGAAGAAGTACGGCCAGAAAGATATCCTTGGCACCAAACACCCAAGAGGTTACTTCCGATGCTCTCGCCGGGAGTCGGAGGGATGCCGAGCGACCAAGGAGGTGCAGCGCACAGACGATTGCGATGAGATCTTCGATTTTGAGTAT…	MPSLEKLEVRINSPYGAAPMGIEHLLGLKEILVIIRGYGANGSSTRAALSALRKAIDTRSSRPTANIMCVDNSLFRGLLDDGFSWKKYGQKDILGTKHPRGYFRCSRRESEGCRATKEVQRTDDCDEIFDFEYKGKHTCTPSEQEQTIQPRIDLPVLWAP
NA, number of amino acids; MW, molecular weight; pI, isoelectric point; Ai, Aliphatic index; GRAVY, grand average of hydropathicity; II, instability index (<40, stable; >40, unstable); SP, signal peptide. The red font represents the mutated amino acids in variants of WRKY domain.
