# Supplementary material for: Genome-Wide Characterization of WRKY Transcription Factors Revealed Gene Duplication and Diversification in Populations of Wild to Domesticated Barley
Source: Int J Mol Sci. 2021 May 19;22(10):5354. doi: 10.3390/ijms22105354 (PMC8160967; doi:10.3390/ijms22105354)
Supplement: Supplementary file 1 [file ijms-22-05354-s001.zip › Table S2-The WRKY genes identified from wild barley.XLSX]

## Sheet: Sheet1
Table S2. The WRKY genes identified from wild barley
WRKY ID	Gene ID	WRKY groups	WRKY motif	CDS	NA	MW (Da）	pI	II	Ai	GRAVY	SP	Subcellular location	coding sequence	Amino acids sequence
HsWRKY1/38	WB01_004671_0312581	IIa	WRKYGQK	1062	353	38617.4	8.14	60.93	62.52	-0.771	no	nucleus	ATGGATCCATGGATGGGCAGCCAGCCATCCCTGAGCCTCGACCTGCACGTCGGCCTACCGCCGATGGGGCACCCGCACCACCACCAGAGCCAATACCAGGCGCCGCCGATGATCGCGCTGGCCAAGCCCAAGATCCTCGTGGAGGAGAACTTCATGCCGCTCAAGAAGGACCCTGAGGTTGCGGTTCTTGAGTCGGAGCTACAGCGGGTGAGCGAGGAGAACCGGCGGCTGGGCGAGATGCTCAGGGAGGTGGCCTCCAAGTACGAGGCCCTGCAGGGCCAGTTCACCGACATGGTCACGGCCGGCGGCAACAACAACCACTACCACAACCAGCCGTCCTCCGCGTCGGAGGGCGGGTCGGTGTCACCGTCGAGGAAGCGCAAGAGCGAGGAGAGCCTC…	MDPWMGSQPSLSLDLHVGLPPMGHPHHHQSQYQAPPMIALAKPKILVEENFMPLKKDPEVAVLESELQRVSEENRRLGEMLREVASKYEALQGQFTDMVTAGGNNNHYHNQPSSASEGGSVSPSRKRKSEESLGTPPPSHTQQQHYAAGLAYAVAPDQAECTSGEPCKRIREECKPVISKRYVHADPSDLSLVVKDGYQWRKYGQKVTKDNPCPRAYFRCSFAPGCPVKKKVQRSAEDKTILVATYEGEHNHTQPPPSQPQQQNDGSGAGKNAGNGKPPQAPATPHHPQQQHKQEAAAVVVSGESAAAASELIRRNLAEQMAMTLTRDPSFKAALVTALSGRILELSPTRDIN
HsWRKY2	WB01_007166_0036726	IIa	WRKYGQK	960	319	34304.6	9.11	54.08	66.71	-0.641	no	nucleus	ATGGAGGAGCAGTGGATGATCGGGCAGACTTGCCTCAGCCTCGCCCTCGGCGTCGGCCAGCCGACGGCGCCGCGAGGTGCTCCCCCGGTGACCAAGGTGCTCGTGGAGGAGGACTTCATGTCCTCCAAGAAAAATCACGAGGTTGAGGCGCTGGAGGCGGAGCTCCGGCGAGTGGGCGAGGAGAACAGGAGGCTGGGCGACATGCTCCGCGCGCTGGTGGCCAAGTACTCCGACCTGCAGGGAAAGGTCAGCGGCATGATGGCGGCGGCCAACAACCACTACCAGTCGTTGACTACGTCTGAGGGCAGTTCCGCGGCCTCGCCGGCCAGGAAGCGCGCCCGCAGCGACAGCCTGAACACCGCGGACCGCAATCCTTCGCCGCCGCTCGCCGCAGCCGGC…	MEEQWMIGQTCLSLALGVGQPTAPRGAPPVTKVLVEEDFMSSKKNHEVEALEAELRRVGEENRRLGDMLRALVAKYSDLQGKVSGMMAAANNHYQSLTTSEGSSAASPARKRARSDSLNTADRNPSPPLAAAGSVNVGPGQPECTSVHEPGDSKRVRADEDKASRVSKVYVHADPSDLSLVVKDGYQWRKYGQKVTKDNPCPRAYFRCSFAPSCQVKKKVQRSAEDKTVLVATYDGDHNHAPPPKHQGSGGRKSGDAAPVRVSPPAPVLVQQQREQEASTADQVADRKNLAEQMAATLTRDPGFKAALVSALSGRIPVA
HsWRKY3	WB01_003489_0593076	IIa	WRKYGQK	978	325	34944.3	8.22	50.45	64.03	-0.603	no	nucleus	ATGGACACGGCGCCGGTCTGCCTCGACCTCATGGTCGGGCGTCCCATGGACCACGAGCCGTCTCCGGCAAGGTGCACCGGAATGGGAACCCAAGCTTGCATTGCTAGCTCACCCTGTGGCAGAGCACCTCCCATCACCAACGATGAGGCTAAGATCCTGGAGGCGAAGCTGACGCAGGTGAGCGAGGAGAACCGGAGGCTCACTGAAATGATCGCATACCTACACAGCAACCAGGCCGCGCGCCAGAGGCTCGACGGCGATGGCGAGCAGCCCGCCAGCACGGCCGCGTCGCCGACGCCGCCGGCGAGCAAGAAGAGGAGCCGGGAGAGCGTGGACACCTCGCATTCTTGCGATGCCAACAGCAACAGGAACGCACGCACGGCCGCGCCGGAGCATGTC…	MDTAPVCLDLMVGRPMDHEPSPARCTGMGTQACIASSPCGRAPPITNDEAKILEAKLTQVSEENRRLTEMIAYLHSNQAARQRLDGDGEQPASTAASPTPPASKKRSRESVDTSHSCDANSNRNARTAAPEHVDVDSPLSNATCRRIKVKKVCTRIDPSDTSLVVKDGYQWRKYGQKVTRDNPSPRAYFRCAFAPSCPVKKKVQRSAEDSSMVEATYEGEHNHPRPTRAGELPSCAAGGGGPVPCSISINSSGPTITLDLTKDGGGVQVVEAAGEAQPDLKKVCREVASPEFRAALVEQMARELTGDRKFTDALAAAILRKLPDY
HsWRKY4	WB01_012176_0049278	III	WRKYGQK	1044	347	36345.1	6.75	61.65	56.28	-0.421	no	nucleus	ATGACATCTTGTGGCGGCGCTGGCGATGACGGCGGGCGCTCACGGCCGGCGGCGGTCTACGACGACCTGGTGGAGGTGCGGGAGCACGCGGCGACGCTGCACAGCATGCTGCAGGGGTCGCCGAGCGTGTCGGCCGTGGACGCGAGGGAGCTGATGAAGGGGATGATGGCCAAGCTGTCCAGCGCTATGTCGGTGCTGGCCACCGCCAGCGGCGGCGTGGAGGCGTCTTCGGAGGCTGGTGGTCGGGGTCCAGGTGGGAGGAGGAAGAGATCGGGCACGGTGTCCGGGCCGCACCGCCGGAGCACCTCCACGAGAAGGTCGAAGAGCCCTTTCATCAACATGGTCACTGCTAGGACGCTCAACGATGGCAAGACATGGAGGAAGTACGGCCAAAAATGT…	MTSCGGAGDDGGRSRPAAVYDDLVEVREHAATLHSMLQGSPSVSAVDARELMKGMMAKLSSAMSVLATASGGVEASSEAGGRGPGGRRKRSGTVSGPHRRSTSTRRSKSPFINMVTARTLNDGKTWRKYGQKCIHACTNPRSYYRCSHKPDQGCQATRQVQESDSNPSEYLISYYGQHTCKDPSTFRSLIIQGAADAAPPEDLPNLISFTSINGAAAASTSSSPNHLVRDAADLHSMLFSRFSNSSSPPVQEGVSSSSPSPSFHGEFTQYAGGQLVDVIGRRTSPLTVGSAPAEYWPVVGIAGVDTDAGAGMDSFPSSPSSLGFMSGSFGGSFGNNVCDDDLFGFDS
HsWRKY5	WB01_000784_1396629	IIc	WRKYGKK	801	266	29267.4	8.73	58.98	51.84	-0.724	no	nucleus	ATGTCCTCGTACTCGTCCCTCATCTCTGTGAGCCCCGGCGAGCAGATCGGTGGGTATGCGGACCAAGGTGACGACGACGACATGGCGGCCGCCGCTAACTACCTATCATCATTCTGCTTTGATTTTGGCGACGAGTATTCCGTAGGGGAGGCAGCAACAGCCTCCTACCCCTTGCACGGACAGCAGCAGCAGGCGCCGACCAAAGCCGACAGCCACCACAGCGGCCAAGCAGCAAGTATTACCAGTTCACAGAGATTCGACAATATCAACACGAGCTTGACGAGCAGCGACGCGAGGAGCAAAGGCAGTAAGATCGCGTTCAAGACGAGGTCGGAGGTGGAGGTGCTGGATGACGGGTACCGCTGGAGGAAGTACGGCAAGAAAATGGTCAAGAACAGC…	MSSYSSLISVSPGEQIGGYADQGDDDDMAAAANYLSSFCFDFGDEYSVGEAATASYPLHGQQQQAPTKADSHHSGQAASITSSQRFDNINTSLTSSDARSKGSKIAFKTRSEVEVLDDGYRWRKYGKKMVKNSPNPRYAHAAQTQSRGYAFWFSSLMKRRATMASRNYYRCSSEGCRVKKRVERDRDDERFVITTYDGVHNHLAPLPPQGCAGYSLSLAQTRVDEGSSPLPMEGRRCFLDAMKMHAAGSLAGSSPVPAPRTLERHN
HsWRKY6	WB01_000476_0443782	I	WRKYGQK	3231	1076	119528	9.12	48.25	76.3	-0.565	no	nucleus	ATGGCTGGTTCGATTTCCCCGGGAGCTGCTGGGAGGAGCGGCAACGACGGGGCACGCTTTGTGACCCTTGACCGCGGTCGTAGCCGCGGTCGCAGTCGCCACCGCCGGCAGGGAAAGGAGATCGTCGTGCACGAGCGCACGATCCAGGAGCGCCTAGTCCCAGGCGGTACCATGGTGTGGCCAATGCTCACGCCGACGAACTACTTCGAGTGGTCCATGCTGATGCAAATCAACATGGAGGCAAACCTGATGTGGAACGCGGTTGAGGGGAATCCGTCGAGCGTCCCCAACGACAAGGCGACGCTGGCGGCGATCCTACGATCCGTGCCGCCGGAGATGGTGGGCGCGATCGTGGTGAAGAAGACGACAAAGGAGGCATGGGATACGATCAAAACCATG…	MAGSISPGAAGRSGNDGARFVTLDRGRSRGRSRHRRQGKEIVVHERTIQERLVPGGTMVWPMLTPTNYFEWSMLMQINMEANLMWNAVEGNPSSVPNDKATLAAILRSVPPEMVGAIVVKKTTKEAWDTIKTMRMGVARVREATTQRLCSEFESIVFRDGEMLDAFGMRITSVVNNLRSLGDTLDEVRVVQKFLRVVPSRYRQIALAIETMLDLNTLSVEELVGRLRFVEERYLTNDQGGGGGAQLLLTEAQWLARKNQRTQGQNSGQGGGQGGGGNDGRDGASNGERDMSQVKCYNCNKLGHFSKQCTEPRRERKDQANLVVAHDQDDEAALLLATVTALTVTTERPVKRVLLNEERSQARASQQDECNAGRLYVLRLSLTKPVCLLTSGDDKAWLWH…
HsWRKY7	WB01_006983_0127733	IId	WRKYGQK	966	321	34062.2	10.09	59.65	65.98	-0.413	no	nucleus	ATGGCCGTGGACCTCATGGGCTGCTACACCCCGCGACGCGCCGACGACCAGCTCGCCATCCAGGAGGCCGCCACCGCCGGCCTCCGCAGCCTGGAGCTCCTGGTCTCCTCCCTCTCCGGCGCGGCGCCGTCCAAGGCGCAGCAACACCAGCACCAGCAGCCGTTCGGCGAGATCGCCGACCAGGCCGTCTCCAAGTTCCGCAAGGTGATCTCCATCCTCGACCGCACCGGCCACGCCCGCTTCCGCCGCGGCCCCGTCCAGTCACCGCCGCCGCCGCCTCCTCCAGCTCCGGTCGCTCCTCCGCCTCCCCCACCGCGCCCTCTCGCCATCGAGCCGGCCAGGCCGGCCCCTTTGACCGTCGTGGCGCCGGTGTCGGTGGCCGCCCCGGTCCTTCAGCCG…	MAVDLMGCYTPRRADDQLAIQEAATAGLRSLELLVSSLSGAAPSKAQQHQHQQPFGEIADQAVSKFRKVISILDRTGHARFRRGPVQSPPPPPPPAPVAPPPPPPRPLAIEPARPAPLTVVAPVSVAAPVLQPQSLTLDFTKPNLTMSGATSVTSTSFFSSVTAGEGSVSKGRSLVSAGKPPLSGHKRKPCAGAHSEANTTGSRCHCSKRRKNRVKTTVRVPAVSAKIADIPPDEYSWRKYGQKPIKGSPYPRGYYKCSTVRGCPARKHVERALDDPAMLVVTYEGEHRHSPGPMPMPMPSQMPMPMGAPVASVSAGNGHV
HsWRKY8	WB01_000123_0642366	IId	WRKYGQK	1068	355	38102.4	10.17	62.22	61.58	-0.597	no	nucleus	ATGGAGGAGGTGGAGGTGGCCAACAGCGCGGCTGTGGAGAGCTGCCACAAGTTGCTGGCCTTGCTCTCCCAGCAGCAGGACCCAGCCCTGCTCAGGAGCATAGCTTCAGAGACGGGTGAGGCATGTGCCAAGTTCAGGAAGGTGGTCTCCCTCCTCAGCAATGGTGGCGGCGGCAGGGGAGGGCATGCTAGAGGCAGGTTCTCCAGGAGAAGGAAGCCCGTGGGGTTCTTGAGCCAGAAAGGCTTCTTGGAGAGCAGCAGCAACGCCCCATTGGGGATGCTCGTGTCCGGGAGTGCACCCACTCCATCCCCATCTGCTGGTTCGGCAGGGCAACTGCGGCCCCAGGTCGGCGCGCCGCCGCCGCCCCCGCGCAGCCTCGATTTGGTCAGCTCAAGCAGC…	MEEVEVANSAAVESCHKLLALLSQQQDPALLRSIASETGEACAKFRKVVSLLSNGGGGRGGHARGRFSRRRKPVGFLSQKGFLESSSNAPLGMLVSGSAPTPSPSAGSAGQLRPQVGAPPPPPRSLDLVSSSSKSAHQFGPPKMVQPLSVQFQFGATAHRYPFQQQQQQNLQAQMFKRSNSGISLKFDSPSGGTGTISSPRSFMSSLSMDGSVASLDGKPPMRLIGGPAASDPLNVRQCAPKRRCRGEDGSGKCTTGGKCHCSKRRKLRIKRSIKVPAISNKISDIPPDEYSWRKYGQKPIKGSPHPRGYYKCSTVRGCPARKHVERCVDEPAMLIVTYEGEHSHNRLPTQSAQT
HsWRKY9	WB01_018843_0051608	IId	WRKYGQK	1182	393	42331	10.03	53.62	58.91	-0.64	no	nucleus	ATGGATGGCATGGAGGAATCCAACAGGGAGGCGGTGCAGAGCTGCTACAAGGTGCTGAACCTCCTCTCCAACCCCCGTGGCCAGCTCGTTCCCCACAAGGAGCTCGTGGAGGCCACGGGCGCCGCCGTCGCCAAGTTCGGCTCCCTAGCTTCCAAGATCGGCGACGGCAATGGCAGACAAGGCCATGCTAGGTTCAGACAAAGGATCAAGAAGCCCATGCCTCTCTTTGACAGCAACCTCTTCCGGGAGAGCCCTGCATCGGCTGCGGCTGCTGATGCTGCAGCTGCACCTAAGACATCCAATCCTGGCCCGAGCACTAGTCTCCAGCTCTTTCCTAGGTACCAGCAGATGGAGGGCTCCTCTTCGAAGGACCCTGTCAGGATCCCAGCCCAGTTCCCC…	MDGMEESNREAVQSCYKVLNLLSNPRGQLVPHKELVEATGAAVAKFGSLASKIGDGNGRQGHARFRQRIKKPMPLFDSNLFRESPASAAAADAAAAPKTSNPGPSTSLQLFPRYQQMEGSSSKDPVRIPAQFPQRMVVENPSVGSNGPARGPPLQLVQPVSVAPPAGTPTPALPAAHLHFIQQQQSYQRFQLMHQMKLQSEMMKRGGHGDQGGSTSGGKGVNLKFDGSNCTGSSSRSFLTSLSLEGSMASMDGSRSSRPFQLVSGSQTSSTPELGLMQQRRRCAGKEDGSGRCATGSRCHCAKKRKLRIRRSIKVPAISNKVADIPADEFSWRKYGQKPIKGSPHPRGYYKCSSVRGCPARKHVERCVDDPAMLIVTYEGDHNHNRAAAAQPA
HsWRKY10	WB01_002686_0054614	IId	WRKYGQK	957	318	33586.7	9.61	53.98	55.6	-0.599	no	nucleus	ATGATGACCATGGATCTGATTGGAGGATACGGGAGGGCGGACGAGCAGGTGGCAATCCAGGAGGCGGCGGCGGCGGGGCTGCGCGGGATGGAGCACCTCATCTTGCAGCTCTCCCGGACAGGCACCAGCGAAAGCTCGCCGGTTGGGTCCTCGGAGGCGCCGGAGCAGGGGAAGCAGCAGGTAGACTGCCGGGAGATCACTGATATGACCGTGTCGAAGTTCAAGAAGGTGATTTCTATCCTCAACCACCGCACCGGTCACGCCAGGTTCCGGCGCGGGCCTGTGGTGGCGCAGTCCCAGGGCCCCGCCGTGTCCGAGCCGGCGCCGGTGAGGGCGTCTTCGTCGAGGTCCATGACGTTGGACTTCACCAAGGCGTCTTCCGGGTACGGAAACGACCCC…	MMTMDLIGGYGRADEQVAIQEAAAAGLRGMEHLILQLSRTGTSESSPVGSSEAPEQGKQQVDCREITDMTVSKFKKVISILNHRTGHARFRRGPVVAQSQGPAVSEPAPVRASSSRSMTLDFTKASSGYGNDPGFSVSAASSSFMSSVTGDGSVSNGRGGGSSLMLPPPPSASCGKPPLASSAASTGAGAGAGQKRKCHDHAHSENVAGGKYGASGGRCHCSKRRKSRVRRMTRVPAISSKAAEIPADDFSWRKYGQKPIKGSPYPRGYYKCSTVRGCPARKHVERDPSDPSMLIVTYEGEHRHSPADQEPLTPLQEL
HsWRKY11	WB01_004222_0054833	IId	WRKYGQK	1359	452	48080.6	9.2	57.83	64.91	-0.434	no	nucleus	ATGGAGGGGGTGGAGGAGGCCAACCGTGCGGCGGTGGTGAGCTGCAAGAGGCTGGTCGCGCGCCTCTCGCTGTCCGCCGGCGACCCGTTCCGGCTCGCCGCCGTCGCGGCCGAGACCGAAGAGGCCGTGTCCCGGTTCGGCAAGGTGGTCAACATCCTCAGCAGCAGGGTCGGCCATGCGAGGGCCAGGGTCGGCCGGAGGAGCTCGCCGGCCGGCGATCCCATTGCGAGGTGCCTCCTTGAGTACCACCCTCCCCCGCCGGTGCCGTATTGCCCACCTGCCACTGCCACTGCCACTGCCACTGCCCCCCAGCTCCATGGGAGTAGCAGTAGCACTCCTGCGCCGCCGACGCCGCTGAAGCAGATGCCGGTGCCGGTGGTGGCGGCAGCTCCTTGTGCC…	MEGVEEANRAAVVSCKRLVARLSLSAGDPFRLAAVAAETEEAVSRFGKVVNILSSRVGHARARVGRRSSPAGDPIARCLLEYHPPPPVPYCPPATATATATAPQLHGSSSSTPAPPTPLKQMPVPVVAAAPCAAGNGKVVAPADNCDADRDMFFDTPLLDLSGCSVTPASIAAAQINGSRVSAAPAAKPTDRGMFFQTPLLDLSGCGVTPASIAAAQINGSRVSAAPAASHPPPPPPPPPPQILFHHQIPQQQQKKKRPLEQQRPASSDNQRFHFEQKPASEKPFHIEIPAARSGKEPEVITFSFDNSVCTSSAATSFFTNMSSQLITMSESSACAPASRKAAHKADDDGKCHCPKKKKPREKRVVRMPAVSDKVADIPSDNYSWRKYGQKPIKGSPHP…
HsWRKY12	WB01_002403_0088241	IIc	WRKYGQK	591	196	21520.4	8.83	40.6	45.2	-0.96	no	nucleus	ATGGAGAATTATCCCATTCTGTTTGGGACGCAGCCCTCATCTTCCACCTCCAACTCATACCACTTCGTGGCAGGAGCGAGCAGCCATCACCATGGTCAAGCAGCTGGCAATAACACCGGCGGCGGCCTCTTCTCGGCGTCCAAGCAGGAGGAGCCCTCCGACGGTGGCGGTGGCGATGATGGTGCAGGAAGCAGCTCGCAGGGCGGCGGTGGCGAGGCCGACGTCGTCGTCGTCGGGAAGAAGAAAGGCGAGAAGAGGGAGCGGCGGCCACGGTTCGCGTTCCAGACGCGCAGCCAGGTCGACATCCTCGACGACGGCTACCGGTGGAGGAAGTACGGGCAGAAGGCCGTCAAGAACAACAACTTCCCCAGGAGCTACTACCGGTGCACACATCAAGGA…	MENYPILFGTQPSSSTSNSYHFVAGASSHHHGQAAGNNTGGGLFSASKQEEPSDGGGGDDGAGSSSQGGGGEADVVVVGKKKGEKRERRPRFAFQTRSQVDILDDGYRWRKYGQKAVKNNNFPRSYYRCTHQGCNVKKQVQRLSRDEGVVVTTYEGTHTHPIEKSNDNFEHILTQMQVYSGLNNVSQTFGNQHMFQ
HsWRKY13	WB01_004181_0114026	IIc	WRKYGQK	666	221	23831.7	8.67	48.53	63.17	-0.613	no	nucleus	ATGGACAACTCGCAGGAGGGAGACGACGAGCTGTTCCGCCACTTCCAGTATCTGCAGTCTCCGCCGCTGATGGAGCAGCAGCCGCAGTCGTCGGCGTGCGACGCAGCGGCCGACCTGGGCGGCCAGCCGGGGATGCCCATGCCCGGGCTGGTGGACTGGGCGTCCCTGCTCCTCCCGCTGGGGCCGGGCGCCGCCGCCGGGCCGACGTCGCAGCAGCAGGTGGTGGCCGGTGGTGTGGCCGGGGAGGAGATATCGATGGTGAACGGCAGGGCGGCGGCGCCGGAGAGCGGTGCCGGGAGCAGCAGTGGGGTGGGGGTGGGAAGGGATCAGGAGACGAAGGGGAAGGGCGGCGCGCGCGGGCGGGGGAGCAGGAAGGCTAGCCGGCCGCGGTTCGCGTTC…	MDNSQEGDDELFRHFQYLQSPPLMEQQPQSSACDAAADLGGQPGMPMPGLVDWASLLLPLGPGAAAGPTSQQQVVAGGVAGEEISMVNGRAAAPESGAGSSSGVGVGRDQETKGKGGARGRGSRKASRPRFAFQTKSENDVLDDGYRWRKYGQKAVKNSAFPRSYYRCTHHTCNVKKQVQRLAKDTSIVVTTYEGVHNHPCEKLMEALNPILRQLQFLSQL
HsWRKY14	WB01_000783_0121529	IIc	WRKYGQK	744	247	26181.4	9.96	41.56	58.22	-0.575	no	nucleus	ATGGCGCTGGCCCACGGCCAAGCAGCTTCCAGGGGCGCAACGACGGCCGGCGGCGCCGCGACAGCCATAACCTTCAGCTTCCAGCAGCCCTCCGATCCTCCTCTGAACGGCGGCCTCTCCCACCACCATGGTCTCCTAGGTTACAGCCCCCTCGTACTAGACCACCCAACCACCACCACTTCGTCCTCCTCCACTATCCCCGCCGCTCCCTCCCTTCACCACCTCCATGCACCTGCCGGAGCCATCCATCCCCCGAGGTCTAGCGAGGAAGCTGATCGAGAAAGGCAGAGGGGGAAGGCCGCGGTTACGGGCATGGCGGTTAACAGCGCGCCGGCGGGGGGAAGTGGAGGCGGTGGACGGTCACATGGGCCGGCAGCGGCGGTGGCTGCGGGGATGGGG…	MALAHGQAASRGATTAGGAATAITFSFQQPSDPPLNGGLSHHHGLLGYSPLVLDHPTTTTSSSSTIPAAPSLHHLHAPAGAIHPPRSSEEADRERQRGKAAVTGMAVNSAPAGGSGGGGRSHGPAAAVAAGMGVGAVRMKKAAGGGAVKARRKVREPRFCFKTMSDVDVLDDGYKWRKYGQKVVKNTQHPRSYYRCTQDKCRVKKRVERLAEDPRMVITTYEGRHVHSPSRDDDDAARANAEMSFIW
HsWRKY15	WB01_000929_0055594	IIc	WRKYGQK	906	301	31608	5.89	64.25	56.54	-0.492	no	nucleus	ATGGCCGGCGCCGCGGGAGAGAGGCCGGAGGGGGTGGGCGGAGGCGGGGACTGGCCGCCGTTCGCCGGCGACGCCTTCGCGGAGTACTCCTCCTCGGTGTTCGCGGAGCTCGGCGGATGGCCGGACGGCCTCGGCGCGGGCGCCGGGGAGCTGCAGTCGCTGGATCTGCCGGAGGCCAGCGCGTCCGCTTCGGTCCCGCTGGCGCGGCCGGACGAGATGCTGCCGGCCGCGTCCTCCTGCTCGAGCGGCGACGGCGCGCCCGCGGCCGCCACGGAGAACGCCGACAGGCCGCAGTCCGCCGCCGACGCAGCGAGCATGAAGCCGGCGGCGGCGACGGCGACGAAGAAGGGGCAGAAGCGGGCGCGGCAGCAGCGGTTCGCCTTCGTGACCAAGAGCGAA…	MAGAAGERPEGVGGGGDWPPFAGDAFAEYSSSVFAELGGWPDGLGAGAGELQSLDLPEASASASVPLARPDEMLPAASSCSSGDGAPAAATENADRPQSAADAASMKPAAATATKKGQKRARQQRFAFVTKSEVDHLEDGYRWRKYGQKAVKNSPFPRSYYRCTNSKCTVKKRVERSSEDPTVVITTYEGQHCHHQTSFQRGGGMHFHGAATVALAEQMSFVPTQQLYNLPPLRRLQMNPASSESAVSSMPPSLQQLNGGDDLGRSTSYSPTASAVQTPSSLVPPDVSFDMGLLGDIVPPG
HsWRKY17	WB01_001683_0033345	IIc	WRKYGKK	600	199	22034.3	6.37	46.23	55.48	-0.652	no	nucleus	ATGGCGGCTTCGTTGGGACTGAACCCTGAAGCTGTCTTCAGCTCCGCCTTCGCCTACTCCTCCCCTTTCGTGGCCGATCACTGCGCGCCGCCCGCCCGCGCCGTCGTCGACGATACTGATTACGCGGCTCAGCTCGACCTCCACGACGATCATCAGCACTACCCTTTCGACCAGTTCGAGTACTCGCCGCCGACGCCGACGGCACAGATCTCCTTCGCCGGCGCCGGGGATGATGAACATCGCAGCGAGAAGACGATCAAGATCAGTACGAGGGTGAGCGCAGGGAGGATCGGGTTCAGGACGAGGTCAGAGGTGGAAATCTTGGACGACGGTTTCAAGTGGAGGAAGTACGGGAAGAAGGCGGTGAAGAACAGCCCGAACCCGAGGAACTACTACCGG…	MAASLGLNPEAVFSSAFAYSSPFVADHCAPPARAVVDDTDYAAQLDLHDDHQHYPFDQFEYSPPTPTAQISFAGAGDDEHRSEKTIKISTRVSAGRIGFRTRSEVEILDDGFKWRKYGKKAVKNSPNPRNYYRCSAEGCGVKKRVERDRDDPRYVVTTYDGVHNHATPGAAEQYYCYSPPRSVVSSPPTAYSAAGLLQF
HsWRKY18	WB01_001355_0068503	IIc	WRKYGKK	627	208	22008.6	8.38	46.44	61.06	-0.383	no	chloroplast	ATGGCGGTAGCTGGAGCCGTGGCAGCGTATCGCTTCCACCCGCACGCCGCCGGCGTCGGCCGCTCGATGGCCTTTCCCCGCCCGTCGCCGTCGGGGTCCGGCTGCCCATACGGCCGCTCTGGAGCCTCGTTGAGCTCTCCCGCCTTTGGTGCGGCCGCCGGGCCCGAGGTGCTTATGCAGCAGCTAGACGTCCTGGACTACTTGTCGGACGACGGCGGGGTGCCCGGCACGGCCGGCGCACCGCTGCCGGTAGAAGCGCCGGTTGTGCCGGATGTTGGTTACTCTGATCATACGAGTAGGGCGGCCGCGGTGGCGGTGGCGGCGAGCGGCAAGATCGCGTTTCGGACGAGGTCGGAGGAGGAGATACTGGATGACGGCTACAAGTGGAGGAAGTACGGC…	MAVAGAVAAYRFHPHAAGVGRSMAFPRPSPSGSGCPYGRSGASLSSPAFGAAAGPEVLMQQLDVLDYLSDDGGVPGTAGAPLPVEAPVVPDVGYSDHTSRAAAVAVAASGKIAFRTRSEEEILDDGYKWRKYGKKSVKNSPNPRNYYRCSTEGCNVKKRVERDKDDANYVVTMYEGVHNHASPGMIYYAAQDPASGRFFVTGTHHLAP
HsWRKY19	WB01_002828_0135051	IIc	WRKYGKK	657	218	23001.5	6.82	54.13	60.18	-0.323	no	nucleus	ATGGCGGCAGTCGGAGCGGCACCAGTGCTCTACCAACAGCAGGCGCAGGCGGTGGGCGACGCCTGCTTCTTCTCCTCCATGTCCTCCTACTTCTCCAACGAGGCAATCAGCTCCACCTGCTCCAGCCCAGCCTCCAGCTTCTCCGCCGCGCTGGGCGCCACGCCGCCCGCTGCGCCGGCGATCATCCCCGACCCCGCGTCGCAGTTCGACATCTCCGAGTACCTCTACGGCGACGGCCCGTTAGCCGCGCCGCTGCCGCCCGTCGGCGCTGCTGTTGCAAGCTCGGCGACTGCGGTGCCTGCGAGGAGCGCGGCCGAGTCGGCGGCGGCGGTGGAGCGGCCGCGGACGGAGCGCATCGCGTTCCGCACGAGGACGGAGATCGAGATCCTCGACGACGGC…	MAAVGAAPVLYQQQAQAVGDACFFSSMSSYFSNEAISSTCSSPASSFSAALGATPPAAPAIIPDPASQFDISEYLYGDGPLAAPLPPVGAAVASSATAVPARSAAESAAAVERPRTERIAFRTRTEIEILDDGYKWRKYGKKSVKNSPNPRNYYRCSTEGCSVKKRVERDRDDPAYVVTTYEGTHSHASPSTVYYASQDAASGRFFVAGTHPPPGSLN
HsWRKY20	WB01_002828_0088232	IIc	WRKYGKK	651	216	22931.3	6.2	46.67	54.44	-0.407	no	nucleus	ATGGCGATAGTCGGAGCGGCACCAGTGCTCTACCAGCAGCAGGCGCAGGCGGTGGGCGACGGGTGCTACTTCTCTTTCATGTCCTCCTACTTCTCCCACGGGGGAGCCAGCTCCAACGCTTCCAGCACCGCGTCCAGCTTCTCCGCCACGCTCGGCGCCACGCCGTCCGCTGCACCGGCCATCGCCGCCGACCCCGCGATGCAGTTCGACATCTCCGAGTTCCTCTTGGACGAGAGCGGCTTCGCCGCGCCGTTGCCGGACGGCGGCGCCGCCGGTGCAACCGCGGCGATGTCGGCGACCGCTCACACTAGGAGCGCGGCCGAGGTAGAGCGCCCGCGGACGGAGCGCATCGCCTTCCGGACGAGGTCGGAGATCGAGATCCTCGACGACGGCTACAAG…	MAIVGAAPVLYQQQAQAVGDGCYFSFMSSYFSHGGASSNASSTASSFSATLGATPSAAPAIAADPAMQFDISEFLLDESGFAAPLPDGGAAGATAAMSATAHTRSAAEVERPRTERIAFRTRSEIEILDDGYKWRKYGKKSVKNSPNPRNYYRCSTEGCDVKKRVERDRDDPAYVVTTYEGTHSHASPSTIYYASQDAASGRFFVAGTHPPPGSLN
HsWRKY21	WB01_008718_0020156	III	WRKYGQK	927	308	32772.6	6.36	53.75	55.19	-0.522	no	nucleus	ATGGAGCAGAGGTGCGCCCTGGCCACGGAGCTCGCGCAGGTGCTCGACACGGTGAGGCAGCTGGAGGCGCACATGGGCGTGAAGGGCGGCGCCGACGGAGGGGAGACGTGCCGGGCGCTGGTGTCAAGCATGCGCTCCTCCGTCGACAGGTCCATCCACATCGCCATGTCTTCGTGCTGCGTGGAGGGGCGCGTCCTCGGAGCGCCCGAGTCGCCGCCGTCTGCCGACGGCAGCCCCCGCAGCGGCGGCTCTGATCAGGCTGCCGACTCCCCTTGCCGCGGCGCTCATGCAGCCGGGCAGTCCAAGAAGAGGAAAACACTGCCCAAGTGGAGCACGCAGGTGAGGGTGAACTCCGTGGAGGACGTCGGCCCCCTCGACGACGGCTTCAGCTGGAGGAAG…	MEQRCALATELAQVLDTVRQLEAHMGVKGGADGGETCRALVSSMRSSVDRSIHIAMSSCCVEGRVLGAPESPPSADGSPRSGGSDQAADSPCRGAHAAGQSKKRKTLPKWSTQVRVNSVEDVGPLDDGFSWRKYGQKDILGAMYPRAYFRCTHRHTQGCYASKQVQRAHGDPLLFDVVYHGNHTCAQGKHCNSQRPQPAASGEHWQPQPAGEQEQISVGQKTGGGAPGVAAPFSFPSKQAGADTGSDFPAGCAITASPFMSPATPECKVSCRNVPDVELSSTTESPMGEMDFMLQLADADFLDNSRYL
HsWRKY22	WB01_006381_0064463	III	WRKYGQK	999	332	35932.2	6.05	50.06	62.32	-0.435	no	nucleus	ATGGAGAGCGTGGATGAAAATGGAGGAAGCCGCCTTGTGGTGACCGAGCTGGGCCACATCAAGGAGCTGGTGAGGCAGCTCGACGTCAACCTGGGAGGCTGTCCCGAGCACTGCAAGCGTCTGGCCGCCCAGATCTTCGATGTAACCGAGAGGTCCATCGGCATGATCATGTCCGGGCACTTCGACTGCCCGAAGCGCTCCGCCGCCGGCCTCGACTCGCCGCCCTTCTCCGCGACTCCCAGCCCCCTGAGCGACGTTTCGGGGATGCCTTTCCATACCAACAACAAGAAGAGGAAGATAATGGAGAAACGGAAGCATCAGGTTAGGGTGAGCTCGGAGGTAGGAGGAGCAGAGACCCCAGTCGATGACGGCCACAGCTGGAGGAAGTACGGCCAGAAG…	MESVDENGGSRLVVTELGHIKELVRQLDVNLGGCPEHCKRLAAQIFDVTERSIGMIMSGHFDCPKRSAAGLDSPPFSATPSPLSDVSGMPFHTNNKKRKIMEKRKHQVRVSSEVGGAETPVDDGHSWRKYGQKDILGAKHPRGYYRCTHRKSQGCAATKQVQRADEDPTLFDVIYHGEHTCVHKTVAALAAGHAEENPGASRLLQNLSTSLTVNTEGLTATAGHQGCSTTTSFCFSSQAARVLAPQEHYPFSMPSTPENCFGQGASLSTSLEPSPVTSDSNRFSMTPFQAEWRARSELDEVVSALVAAGAPAMEETPFSLDGFEFDVSGFFA
HsWRKY23	WB01_007166_0083256	IIa	WRKYGQK	1020	339	36104.6	9.34	51.2	68.29	-0.557	no	nucleus	ATGGACGAGCAGTGGATGATGGGGCAGACTTCCCTCAGCCTCGGCCTCAACGTGGGCCGGCCGACGGCGCGGGGAGGGGGTCCTCCGGTGCCGTCCAAGGTGCTCGTGGAGGAGGACTTCATGTCCTCCAAGAAAAGCCACGAGGTCGAGGCGCTGGAGGCGGAGCTCCGGCGTGTGGGCGAGGAGAACAGGAGGCTGGGCGACATGCTCCGCGCGCTGGTGGTAAAGTACTCCGACCTGCAGGGCAAGGTCAGCGGCATGATGGCGGCGGCGGCGGCCAATAACCACCAGTCGTTGACGTTGACTACGTCTGAGGGCGGCTCCGCTGCCTCGCCGTCCAGGAAGCGCGCCCGTAGCGACAGCCTCGACACCGCCGGCCGCAATCCTTCGCCTCCGCTC…	MDEQWMMGQTSLSLGLNVGRPTARGGGPPVPSKVLVEEDFMSSKKSHEVEALEAELRRVGEENRRLGDMLRALVVKYSDLQGKVSGMMAAAAANNHQSLTLTTSEGGSAASPSRKRARSDSLDTAGRNPSPPLAAAATGGFAISVNVGPGRDQAECTSVHEPCNSKRVRADECKASRVSKLYVHADPSDLSLVVKDGYQWRKYGQKVTKDNPCPRAYFRCSFAPSCQVKKKVQRSAEDKTVLVATYEGEHNHAQPPKLQGAGSRKSGGDAAPVRASPAPALVQQQRNQEAPAASVADQVADRKNLAEQMAATLTRDPGFKAALVSALSGRILELSPSNS
HsWRKY24	WB01_001127_0228776	I	WSKYGQK	4929	1642	184901	6.38	48.22	83.25	-0.441	no	nucleus	ATGGACGCGCCTTCTTCGCCGCCGGGGCTCAAAGTGCGGCGGGAGTCGCACGACATCAAGAAGCCGTCCGGGGCGCCGGAGCAGTCCCAGGCGCAGGGGCATGGCCGGCTGGAGCAGCAGCGACGGCAGGCGGTGCGCATCGACGCCAATCCCAGCTTCAGGGAGCTTGTTCAGTATCTGAGCGGTGGCGTTCCAGCATCCGACTCGCTTGTGCACCAGCTAGTGGGTCAAGGATCTGAATCTCAGACCCAGGAGTTCCAGATCGTTGAGGCCGGGGAGTGGCAGCCGTCCCTGCCGTCGGAGCAGCTGCTCTCGGCTGCAATCTCTCCGGCGGGAAGGCTGGCATCCACCGATAGGTCCCTCCGTCCGGTGCCCACATGGCCGCCGGACGTCATAGAC…	MDAPSSPPGLKVRRESHDIKKPSGAPEQSQAQGHGRLEQQRRQAVRIDANPSFRELVQYLSGGVPASDSLVHQLVGQGSESQTQEFQIVEAGEWQPSLPSEQLLSAAISPAGRLASTDRSLRPVPTWPPDVIDLTDDRFEDGGLAGIADDDWLSLKGALPSSPPPDSTSGQFLPQGPKSVKKLKQTVSDISHEVHSQVKQACHTKKRTQQIQAPVCAMADAMFRLPEKLDALLASHGQTLPRGAEEEIPLIKQDLEKMVAILQEHDDSGAEDRAMTAKCLAKEVRELSYDMEDCVDQYEQTATTSKWIAPRLKKQKFARRRVTRLPVKLRWRLWMANKIREFSLRSQEALQRYSLFNHHGDNAIRAAAIGGTGTSTPPRHDASFGSWYPTPYEELVGIG…
HsWRKY26	WB01_007124_0263751	III	WRKYGQK	765	254	26595.7	5.62	40.8	64.41	-0.32	no	nucleus	ATGGAGGGCACGACGGCGACGCTGGCGTCGGAGCTGGACGGGCTGCTGGCCATGGCGAGGGAGCTGGAAGCGCGCGTCGACGGCGACCAGGGCGCGCCCGGCGCGGCGAGGGAGCTCTGCGCCGAGCTAGCCGCGTCCGTCGACCGGGCCGTGCGCCTCGCCGGGAGCGGAGGCAATGCCGGCGGCAGGGCGTGCGTGAACGGCCGGCTCAGGAGCGGCAGGAATGCGGCGGCAGTGCGGGCGCAGGTCCGGGTGGCGTCGATGCATGACCTCGGCCCGCTCGACGACGGGCTCAGCTGGCGCAAGTACGGCCAGAAGGACATCCTGGGCGCCACGTACCCCAGAGCATACTTCCGGTGCACGCACCGGCACTCGCAGGGCTGCCAGGCCACCAAGCAG…	MEGTTATLASELDGLLAMARELEARVDGDQGAPGAARELCAELAASVDRAVRLAGSGGNAGGRACVNGRLRSGRNAAAVRAQVRVASMHDLGPLDDGLSWRKYGQKDILGATYPRAYFRCTHRHSQGCQATKQVQRAHADPLLFDVVYHGAHTCAQAAAALAGPEHQPPAAFGLEQQQQSSPPAAPQGIQWPAEPMTPPSFPSSPAGCYTPASSWCQLTGGYGYAAGGGLGADMEFDELFCNTPGFFEPEVQNL
HsWRKY27	WB01_005405_0019083	III	WRKYGQK	762	253	26548.5	5.21	26.98	69.13	-0.349	no	nucleus	ATGGAGGACACGGCGGCGGCGGCGACGCTGGCGACGGAGCTGGACGGGTTGCTGGCCATGGCGAAGGAGCTGGAGGCGCGCGTCGACGGCGACCAGGGCGCGCCGGGCGCCGCCAGGGAGCTCTGCGCGGCTCTGGCCGAGTCCGTCGACCGGGCCATGCGCCTCGCCGGCAGCAGCGAGGGCGAGGGCGAGGGCAATGCCACCGGCAGGGCGAGCGTGAGCGGGCAGGTCAGGGGCGGCAGGAAGTCGGCGGCGAACAAGGTGCGAACGCAGGTGCGGGTGGCATCGGTGACGGACGTGGGGCCGCTCAACGACGGGCTCAGCTGGCGCAAGTACGGCCAGAAGGACATCCTCGGCGCAACGTACCCCAGGGCATACTTCCGGTGCACGCACCGGCAC…	MEDTAAAATLATELDGLLAMAKELEARVDGDQGAPGAARELCAALAESVDRAMRLAGSSEGEGEGNATGRASVSGQVRGGRKSAANKVRTQVRVASVTDVGPLNDGLSWRKYGQKDILGATYPRAYFRCTHRHTQGCQATKQVQRTHADPLLFEVAYHGEHTCVQAAVQQQPPACFGQGQQSPPAVAPEGIQWPVTPPSFPSTLADHVGDCYPSVCQLDGGYGYGAGGGLGADMGVGSQLDDWFLYLSEVQNL
HsWRKY28	WB01_006381_0425981	III	WRKYGQK	1041	346	36719.8	5.65	50.11	62.95	-0.396	no	nucleus	ATGGAGGCAGTGGAAGGCAATGGAGGAGGGAGCGGCCTGGTGGTGACGGAGCTGAGCCACATCAAGGAGCTGGTGAAGCAGCTGGACGTGCACCTGGGAGGCTCGCCGGGCCTCTGCAAGCACCTCGCCCAGCAGATCTTCGCCGTCACCGAGAAGTCCATCGGCATCATCAGGTCCGGCCACTTCAACTGCCCCAAGCGCTCGGCCGCCGGCGCCGGCCTCGACTCGCCGCCGCTGTCCGCGACGCCCAGCCCCGTCAGCGGCGTCTCCAACACGCCGTTCAAGCCCAACAAGAAGAGGAAGACGTCGGAGAAAGGGCGGCATCAGATCAGGGTGAGCTCGGCGGGAGGAGGAGCGGACGCCCCGGCCGACGACGGCCACAGCTGGAGGAAGTACGGC…	MEAVEGNGGGSGLVVTELSHIKELVKQLDVHLGGSPGLCKHLAQQIFAVTEKSIGIIRSGHFNCPKRSAAGAGLDSPPLSATPSPVSGVSNTPFKPNKKRKTSEKGRHQIRVSSAGGGADAPADDGHSWRKYGQKDILGAHHPRAYYRCTYQKTQGCAATKQVQRADEDPALFDVIYHGEHTCLHKTAAAMVQPDGQNQDAQSLLQNLSSSLTVKTEGLIAAGTQGWSTTTPFSFSSPAVSGMTPPEHHPFSAPSTPENCFVSMPTSLEPSPATSGSNHMCFNPFQAQSELQTMVSALVEATSMPPADTEEAGFAYWSFDDSALDVNSFDEDVTNFDISAFLASDV
HsWRKY30	WB01_005884_0003812	III	WRKYGQK	903	300	31970.5	6.1	45.58	63.1	-0.442	no	nucleus	ATGGAGAGCGTGGAGGGAAACGGCACCGGCCGCGGGAACCTGCAGCTCGTGGTGTCGGAGCTGTGCCGCATCCAGGAGCTGGTGCGGCAGCTGGAGCTGCACCTGCACGCGCCGGACACCTCCGTCGACCTATGCCGCGCCCTCACCGCTCAGATCTTCGCGCTCACCGACAGGTCCATCGGCTTCGTCGCCGCCGCACATTCCTCCGACGCCCCGACGACGCCCTCCAGCACGTCCAGCTCCCTCAGCGGCGTCTCCGACCAGCCTTTCAGGACCAACACCAAGAAGAGGAAGGCGACGGCGAGGTGGACGAGCCAGGTGAGGGTGAGTGCGGCCGGCGGCGCGGAGGGGCCTGGCGACGACGGCCACAGCTGGAGGAAGTACGGGCAGAAGGACATC…	MESVEGNGTGRGNLQLVVSELCRIQELVRQLELHLHAPDTSVDLCRALTAQIFALTDRSIGFVAAAHSSDAPTTPSSTSSSLSGVSDQPFRTNTKKRKATARWTSQVRVSAAGGAEGPGDDGHSWRKYGQKDILGAKHPRAYYRCTHRNSQGCTATKQVQRADEDPVLFDVVYHGQHTCRPTGGGGGGRRPPTNQHNPHAESLLQSLRAGLAVDADHGGLNTSVCVSPPMTSPSMASPVASGSNGGPTMSPYPAGAYTEWPLDGDLQEVVSVFTAVSAPSMDYLFEFDPTFDVDAPNFFM
HsWRKY32	WB01_006041_0342958	III	WRKYGQK	837	278	29046.3	8.72	36.73	66.51	-0.487	no	nucleus	ATGGCGCCGTACGAGCAGGTGGTGGACGACCTGGCCAAGGGGCAGGAGTTCGCGACGCAGCTGCAGGGCCTCCTCCGGGACTCCCCCAAGGCCGGCCTCATCATGGACCAGATCCTCCACACCTTCTCCCGCGCCATCCACGCCGCCAAGGCCGCGGCCGCCGCCAGCGCCAGCGCCAGCAGCGGGAGCGAGGTCACCGACGGCGCAACCAGCGGCGGGAAGAGGAAGTCCGCCGCCGGTGGAGGGCCGCGCAAGGCCTGCCGGACAAGGACCCATGATTCGTCCGTGGTCACCAAGAAGATGAAGAGCTTGGAGGACGGGCAGACATGGCGCAAGTACGGGCAGAAGGAGATACAGAACTCCAAGCACTCCAATGCCCGGCGCGGCGGCAGGCCCAGC…	MAPYEQVVDDLAKGQEFATQLQGLLRDSPKAGLIMDQILHTFSRAIHAAKAAAAASASASSGSEVTDGATSGGKRKSAAGGGPRKACRTRTHDSSVVTKKMKSLEDGQTWRKYGQKEIQNSKHSNARRGGRPSAATKTRTRTGSPTSAVHTCQDPAAAVTPHAPHLTGGCHLISFAPAAAHVLPTTSTTTTNTNLVDQDAAARGSGLRLPGLKLEGGDLEEVLSSRTPGSSALHGAATWPDQGDVTSTLQYGLGQGDLFLDGYTYLEDFMPLPYGLDH
HsWRKY33	WB01_001263_0552403	III	WRKYGEK	621	206	22908.4	8.38	64.01	49.37	-0.788	no	nucleus	ATGTCTCCCGTGCCGAGCCCCAATCAATCACACCTTCTAGGCCACGGATCAAGGAAAGAGAAGCGCATGAGGAAGGTGGATACCTTTGCGCCGCACAACGACGGCCACCAATGGAGGAAGTACGGCGAGAAGAAGATCAACAACTGCAACTTTCCCAGGTACTACTACAGATGCACCTACAAAGACAACATGAACTGCCCGGCCACCAAGCAGATTCAGCAGAAAGATCACAGCGACCCCCCATTGTACCAAGTCACATACTACAATGAGCACTCGTGCAACAGCGCCTTCCTTGCCCTCACCCCCACAGAGTTCCAGCTGCAGACCGCATCTGGAAAGGCGGTCTCCATCTGCTTCGATTCATCTGGTGCTCAGGAGCCGGGAGCCAATGCCAGCTCG…	MSPVPSPNQSHLLGHGSRKEKRMRKVDTFAPHNDGHQWRKYGEKKINNCNFPRYYYRCTYKDNMNCPATKQIQQKDHSDPPLYQVTYYNEHSCNSAFLALTPTEFQLQTASGKAVSICFDSSGAQEPGANASSPSSSAAPRSAPSENKNKPLALRSEALSSWGPGVVEQKTACADIQSCSTECQDAYISEDIDAGRFGSIRFFHFL
HsWRKY34	WB01_006048_0051507	III	WRKYGEK	672	223	24618	7.68	60.05	44.71	-0.807	no	nucleus	ATGGCCCTGGACTCCGTCCCGTCCTACCCCAGCGACCTGGGATCCAGCAGCAGTAGGACAACCAGGACCCAGCAAAGAATCCGGAAGGAGGAGCGGACGTGGACGGCGGACACCTACGCACCGTACGACGACGGGCACCAGTGGAGGAAGTACGGCGAGAAGAAGCTCTCCAACTCCAACTTCCCGAGGTTCTACTACAGATGTACCTACAAGACTGACCTGAAGTGCCCTGCGACAAAACAAGTCCAGCAGAAGGACATGAGCGACCCACCATTGTTCACAGTCACTTACTTCAACCATCACAGCTGCAACACCACCTCGAGGCCCATCGGCAGCGCCCCAGACACCACCGAGCAGTCGTCCTCGAGGAGGGCGGTGTCCATCTGCTTCGGGTCGCAT…	MALDSVPSYPSDLGSSSSRTTRTQQRIRKEERTWTADTYAPYDDGHQWRKYGEKKLSNSNFPRFYYRCTYKTDLKCPATKQVQQKDMSDPPLFTVTYFNHHSCNTTSRPIGSAPDTTEQSSSRRAVSICFGSHATGEQPTFLTSPGTLQSPASTTNQQSDIGAYGHQFQWTDTSPSADDAPVKMETDSLAGTGASSGGASGHALSRTLLPIGQSRCIEYFHFL
HsWRKY35/41	WB01_000755_0003845	I	WRKYGQK	1470	489	52864.9	5.93	41.8	70.25	-0.572	no	nucleus	ATGGCGGCCGGCCAGTGGTCGGCCATCGGCGACGGCGGCGGCCTCTGGTCCCCGCAGGCGCTCGAGAGCCTCTTCCCCGACGAGCAGCCGGCGGCGGCGCAGCTGGGCTTCTTCGGGGGGTCCCTCGCGCAGCTCGCTCCCCCTCCGCCGCTCTGCGCCATCGCGCTCCTCGGGTACCCCCAGGATAACTTTGATGTGTTCAATGAACAAGACCTAGCACAGGTGGCAGCACAGGTGGCTCAAAAGAAGGAGTTGCAGGAAAAACAAGCGGCGTTATTACATCCGAAGGTTGCACCTCAACTAGCTTTTCCTAAATACAGTATACTTGATCGAGTGGACAATTCTTCTTCTTTCAAACCGGCAACTTCAGTACTGACACCTCAGCATGTCACTTCTGTA…	MAAGQWSAIGDGGGLWSPQALESLFPDEQPAAAQLGFFGGSLAQLAPPPPLCAIALLGYPQDNFDVFNEQDLAQVAAQVAQKKELQEKQAALLHPKVAPQLAFPKYSILDRVDNSSSFKPATSVLTPQHVTSVIAASMQGMSTLPSHTGSGSMNTGPTGILQVLQGSSTTLDSINTGSAGVLQVLQGSSTTLDSINTGSAGFLEALQGSSITLDKPADDGYNWRKYGQKAVKGGKCPRSYYKCTLNCPVRKNVEHSADGRIIKIVYRGQHCHEPPSKRFKDCGDLLNELDELNDAKEPSTRSLLGFQGYYGKPKPITPNGTMADGLLPTKEEGDEQLSSLSDIREDDGEIRTVDGDVGDADANERNAPGQKIIVSTTSDVDLLDDGYRWRKYGQKVVRG…
HsWRKY36	WB01_005337_0090997	IIc	WRKYGQK	987	328	35154	6.18	51.01	64.05	-0.607	no	nucleus	ATGGCCAATCAATCCCTTCACAAGTGTGGGCTCCTCGTCCAGGAACAAGAGATGGGAGATGCACTCAGGGATCACGACCTCGCAGCCACCGCCGACGACGAGGACGCTGGCGTTTGGCCCGGTGAGCTCGACGAGCAGCTCATACGGGAGCTCCTCAGCGATGACAGCCTCCTCGGCTCCATGTATCCGGACAACGACTCGGGGCGCCACCGCTCCTGCGACACGGGAGGCGCCCCTGCCGCCGCGCCGTGCAACAGCGGCGGCAGCACCGCGGCCGAGCACGAGCCGTTGCCGCCGGCTTCGGCGTCGAGTATGCCTCTGTGCTCGGCCTACTCCGGCCCTACGATCAGGGACATCGAGAAGGCGCTGTGGTCTCGGCCGTACACCTCCAGCCAGCGC…	MANQSLHKCGLLVQEQEMGDALRDHDLAATADDEDAGVWPGELDEQLIRELLSDDSLLGSMYPDNDSGRHRSCDTGGAPAAAPCNSGGSTAAEHEPLPPASASSMPLCSAYSGPTIRDIEKALWSRPYTSSQRYGSLHFRRYGAPGTAPESRHVTKVRSCGGGKKTPMDGYRWRKYGQKFIKNNPHPRSYYKCTSARCSAKKHVEKSTDDPEMLIVTYEGSHLHGPQTTTLRRFQPPDAAADLPGAAGVAIAGAGIGCSVRPSYGTSSGDDVRREDNQPLHRGAVQRVATDTPSSSLPHVAAVDATVLSSSSLDSPWSLEALLPVERI
HsWRKY37	WB01_003884_0705734	IIb	WRKYGQK	1485	494	51398.5	7.65	49.55	65.38	-0.388	no	nucleus	ATGGACGTCGGCGTCGAGAGGCCGCCGCCGGTGAAGGAGGAGAACAAGCCGGACACCATGCAGATCGGAAGCGCGCTTCCAATGGTCCTTGAGAGTTTCCCATCCACGCAAAGAAATTCCATCGCCACCAGCAAGGACGACAAGCTGGAGGCGACCAAGGCGGAGATGGGCGAGGTGAGGGAGGAGAACGAGCGCCTCAAGACGCTGCTCTCCCACATCGTCAGGGACTACCAGTCGCTCCAGACGCACTTCCACGACGCCGTCAAGGTCAAGCAGCAGGCACCGGCCGCCGACAAGCTCCCTGCCGCCTCCGCGCCGGCGCCCACCGCCGACGACCTCGTCTCCCTGAGCCTCGGCAGCGGCGGCTATTCCCGTCCCAAGGGCGCCCACCAGAGGTCG…	MDVGVERPPPVKEENKPDTMQIGSALPMVLESFPSTQRNSIATSKDDKLEATKAEMGEVREENERLKTLLSHIVRDYQSLQTHFHDAVKVKQQAPAADKLPAASAPAPTADDLVSLSLGSGGYSRPKGAHQRSLSSSSSGTETDPDDQLSLGLSSRRSTDGDDRQAARPSATPLMNLSSDSSADDTAAPGHDLPAAACPTATKARKSPGAGVDGADDEVLQQQAKKARVSVRVKCDTPTMNDGCQWRKYGQKISKGNPCPRAYYRCTVAPSCPVRKQVQRCADDMSILITTYEGTHSHPLPPAAAAMASTTSAAASMLLAGSSSSSSHGHHLPFASAGLLGPTTISTIASCPTVTLDLTAPHSLMQQQYQSPYAAAMAAGYESKALPAAWSSGYLAPYG…
HsWRKY39	WB01_000560_0895303	IIe	WRKYGQK	846	281	30682.9	5.15	76.46	48.33	-0.911	no	nucleus	ATGTCGGACTGCAGCACCGGCACGGACTCGCCGCGGGCGGACTCCGTCGACGAGCAGCCGCCCGCCGACGCCGAGTCGCCCGGCGGAGGCCAGAGCAAGCGCGACCACCCCTCGCCGTCGTCCCCGCTCCCGCCGCCAAAGCGCAGCCGGAGATCTGTGGAGAAGAGGGTGGTGTCGGTGCCGATTGCCGAGTGCGGCGAGCGGGCCAAGACCAACGGCGAGGGCCCGCCGCCGCCGGACTCGTGGGCGTGGCGCAAGTACGGCCAGAAGCCCATCAAGGGATCCCCCTACCCGCGGGGGTACTACCGCTGCAGCAGCTCCAAGGGGTGCCCGGCGAGGAAGCAGGTGGAGCGCAGCCGCACCGACCCCACCGTGCTGCTCGTCACCTACTCCTACGAT…	MSDCSTGTDSPRADSVDEQPPADAESPGGGQSKRDHPSPSSPLPPPKRSRRSVEKRVVSVPIAECGERAKTNGEGPPPPDSWAWRKYGQKPIKGSPYPRGYYRCSSSKGCPARKQVERSRTDPTVLLVTYSYDHNHPWPAPKAGCHPTKSSSHRLVDPKPEPGTPVDCQPEHGPEAPEQGQEEEHEQKPVIGLADAAAITPVTAAAEEEEESFDFGWFEQYPTWPRTALYVPAFDVAPPEDWERELQGEDALFAGLGELPECAIVFGRRRELALPATAPCS
HsWRKY40	WB01_000313_1304407	I	WRKYGQK	1035	344	37840.2	8.82	51.66	52.73	-0.679	no	nucleus	ATGCAGACAGTGAGTACTGATGAGTGGAAGATGCAAAGTCAAGAGAAGATAACACCTGTGAAGCCTGTAGCCTCCAGGCCTTTCTCCAGTTTCACTTCCTTCTCGAAGCTCTTGGAAGACTTCACTGGGACTGGTTCTGCGCAGATCACCTCTCTAGGAGAGACTGTTATAGTTAGGCGGCCGAAGGTAACACGTTTCGCACCGCCACCAAGTGATCTATCTGCAGGAATCGCTGCAACCATGTTCGAGGATGCTGGTTTAGATACCACACGTGAACAAATGGTCATCGATCCAGAACAAGTAGTCTCCTGTGACCAGATGACGGCATTCCACAATATCAACAAGCCAATTCATAGTATGAAAAACCGTTTGTCCTATGATGGCTACAATTGGAGGAAG…	MQTVSTDEWKMQSQEKITPVKPVASRPFSSFTSFSKLLEDFTGTGSAQITSLGETVIVRRPKVTRFAPPPSDLSAGIAATMFEDAGLDTTREQMVIDPEQVVSCDQMTAFHNINKPIHSMKNRLSYDGYNWRKYGQKQVKGSEFPRSYYKCTHPTCPVKRKVETTVDGQIAEIVYNGEHNHPQPHPPKKPASSASTEVLVPGAHGSNDAGAESQVGGCNLVLGSAPVATAFRSSCDCVDEFGNTSPVYHCNTSRKEKQSSITNGLTSSSEAAPAFQSPTECESSRDAAFRWRKYGQKAVNGNSFPRSYYRCSTARCNARKFVERSSDNSLVTTYEGKHNHAQLK
HsWRKY42	WB01_007536_0117658	I	WRKYGQK	2031	676	73319.9	6.11	58.85	48.37	-0.806	no	nucleus	ATGGCCGGCACCAGCGACCGTGGATCCCTCATGGAGGACTGGATGGCCATGCCCCCGACGCCCAGCCCGAGAACGCTCATGTCAAGCTTCTTGAACGAGGACTTCAGCTCTGGTCAATTCTCCAATTTTTTCGGCGAACATGTGAGCAACAAGCCCCATGATCAATCAGAGAAGAGAGGAGAGCTTGTGGATTTGAGGGAGCAAGTGCCTGCTCAGCCACCTACAGCTATGCCCCAAAAGGATTTTTCCCTGCAACCAAATTCGTTCAATGCTAATCAGAAACCAAACCCACAGGGATCTCTAGCTGAGCGCAGGGCTTCGAGGGCTGGTTTCAGTATCCCCAAGATCGATACATCTCGTGTGGGTTCGTCCACAGTTATTCGATCACCCATAGCAATT…	MAGTSDRGSLMEDWMAMPPTPSPRTLMSSFLNEDFSSGQFSNFFGEHVSNKPHDQSEKRGELVDLREQVPAQPPTAMPQKDFSLQPNSFNANQKPNPQGSLAERRASRAGFSIPKIDTSRVGSSTVIRSPIAIPPGLSPTTLLESPVFLYNSMAQPSPTTGKLFVASAANSTMPPDSTFSNDVFSFQPHSGPTSYSNVEKGYNVCHQNQSMSNMHQQGSSLQSSFTAVKDSADEAIVKPKTSDSMFSDNHTSEEQEENEEDQNEEYSSATNSNPGEDGYNWRKYGQKQVKSSEHPRSYYKCTHPDCPVKKKVERSQDGQITEIVYKSSHNHPLPPPNRRSGIPSSQINDPQVHVLERPGLHAGLNTASLWENGKSECIQDAQGVEGRSAACPPVSAYGD…
HsWRKY43	WB01_000095_0859167	I	WRKYGQK	1533	510	55197.2	5.33	58.39	41.2	-0.818	no	nucleus	ATGGCCATGACGCCGCCGTCCTCCTTCCCGCCGGCGTCCCCGTCGTCGTACTTCAACATGTCCTCCGGGTTCCTCGACTCGCCGGTCCTCCTCACCCCCAGCTTGTTCGCGTCGCCGACGACGGGCGCATTCCCCTCGCATCAGTTCAACTGGATGGGGACGCCGGAGAACGAGGGCCTGCAGGGAAGCACCACCAACCAGGACGAGCAGCAGCAGTACTCCGGCTTCACGTTCCAGACGACGGCGCCGCCGCCGGTGGCCACCACGACCGCGTCCTCCTTCCTGCAGTCGTCCATGCCCATGGCTCAACTGGTGGGAGACTCGTACCCGCAGCAACAACCGTGGAGCTACGAAGACACGGGCATGAACGGGAGCACGAGACCGGCAGAGTTCACCACG…	MAMTPPSSFPPASPSSYFNMSSGFLDSPVLLTPSLFASPTTGAFPSHQFNWMGTPENEGLQGSTTNQDEQQQYSGFTFQTTAPPPVATTTASSFLQSSMPMAQLVGDSYPQQQPWSYEDTGMNGSTRPAEFTTQFEPPTTSTIMATTAPDVLGNGAYSVPVSSGTAAYRVQSRRPSSDDGYNWRKYGQKQMKGSENPRSYYKCSFAGCPTKKKVEQAPDGQVTEIVYKGTHNHPKPQNPRRGSGSAASSSYALQYQGSNDVSSDALSGTPENSSASYGEDETNGVSSRLAGAVSGGEDQFDSEEPDSKRWRNDGDGEGTIMAVGNRTVREPRVVVQTMSDIDILDDGYRWRKYGQKVVKGNPNPRSYYKCTTPNCPVRKHVERASQDLRAVVTTYEGKH…
HsWRKY44	WB01_001780_0594269	IIe	WRKYGQK	1074	357	37828.1	5.28	61.93	51.48	-0.686	no	nucleus	ATGGAGGGGGACGCCGGGTGCTACTACCTCGGCGGCGGCTGCAACGACTGGGACCTCAACGCCGTCGTTCGCTACGCCTGCCGCGGCCGCGTCCCGCCGCCGCCCCCCTCGGACGACCCCTTCTCCTCCTTCCTCCCCCCGCCGGTGCCCGCGGTGGAAGACCACGGGATGCCCCACGCCGCGGATCCGCCCGTCAACGGGAACGGGGTCTCTGATGCCGTCGACGAGCTCTCCATTGCCTTCTTCGCACCGTCGTCAACGGGGACTCTGCTGCCAACCTCGCCTCAGCCGCCGCCGCTGCAGCAGCAGCCAGCGGCGCCAACGGACCAAGAAATGGTGCCGATGCAACAAGACGAGCCGGTGCCGCCTCCGGTGCTGCAGGCCGCGGGCGTGCAAGGC…	MEGDAGCYYLGGGCNDWDLNAVVRYACRGRVPPPPPSDDPFSSFLPPPVPAVEDHGMPHAADPPVNGNGVSDAVDELSIAFFAPSSTGTLLPTSPQPPPLQQQPAAPTDQEMVPMQQDEPVPPPVLQAAGVQGPVGEGSRSKRKKKVVKKVVKRVAADGTSADPWAWRKYGQKPIKGSPYPRGYYRCSTDKACEARKMVERCRDDPNSFILTYTGGEHSHPAPAHRNSLAGTTRNRQAPDPAPRHQGAPAAKATGESSSAAAAPEPSPGQSTSGGMSPTTPLRTPSMEEEYNQEEELDEAAGGASRPSKDAEMARETEMNKLLDACVHPRDDAGIFVEETFVVTPWATALGGAAGWS
HsWRKY45	WB01_001967_0014753	IIe	WRKYGQK	894	297	31286.6	5.14	55.95	57.54	-0.562	no	nucleus	ATGGACGGCGAGTGGAGCGACGGGGCGGCGTCCGGCGGCGAGCAGAAGGCCAGCGGGGATGGCGTTTCGGCGGACTGCAACAGCCCGGGGTCGCCTTCGCCACCGGCGGTGCCGTCGACTAGCGGGAGGAGGCGGTCGTTGCAGAAGCGGGTGGTGACCGTGCCCCTCGCCGACTTGAACGTCCCGCGGCCCAAGGGCGTCGGCGAGGGCAACACGCCGACGGACTCGTGGGCGTGGCGGAAATACGGCCAGAAGCCCATCAAGGGCTCGCCCTTCCCAAGGGCTTACTACAGATGCAGTAGCTCCAAGGGTTGCCCGGCGAGGAAGCAGGTGGAGAGGAGCCAGGCCGACCCGGACACGGTGCTCATCACCTACTCCTACGAGCACAACCACTCCAGC…	MDGEWSDGAASGGEQKASGDGVSADCNSPGSPSPPAVPSTSGRRRSLQKRVVTVPLADLNVPRPKGVGEGNTPTDSWAWRKYGQKPIKGSPFPRAYYRCSSSKGCPARKQVERSQADPDTVLITYSYEHNHSSTAARVQSRPTPKPGKLERPLPSPEPAKSDDTDTHHGTANVAGGLVTESPAAPAIEVHDDFRWLYDVVSVTSSTSPSQVEAADDMLLYGPMFFGKAAVDTAALLPDEFGGEAVCREGSEEDDAMFAGLGELPECAIVFRRHAGDGLSAMAGGVKVEQPAEGTAMT
HsWRKY46	WB01_001296_0607281	I	WRKYGQK	1848	615	66395.6	6.48	53.83	52.07	-0.823	no	nucleus	ATGGCCGATTCGCCGAACCCTAGCTCCGGGGACCTCCCCTCGCCCGCCGGGAGCTCGCCCGAGAAGCCCTACCCCGCGGATCGACGCGTCGCGGCGCTCGCCGGCGCGGGCGCGAGGTACAAGGCCATGTCCCCCGCGCGGCTGCCGATCTCGCGCGAGTCCTGCCTCACCATCCCCGCCGGCTTCAGCCCCTCAGCGCTCCTCGACTCCCCCGTGCTCCTCACCAACTTCAAGGTTGAACCTTCACCAACAACTGGTAGTCTGGGCATGGCTGCGATTCTGCACAAGAGCGCTCATCCAGACATGCTGCCTTCGCCACGGGATAAATCTGTTCGTAATGCCCATGAAGATAGGGGTTCTAGGGATTTTGAATTCAAGCCTCATCTGAATTCGTCTTCT…	MADSPNPSSGDLPSPAGSSPEKPYPADRRVAALAGAGARYKAMSPARLPISRESCLTIPAGFSPSALLDSPVLLTNFKVEPSPTTGSLGMAAILHKSAHPDMLPSPRDKSVRNAHEDRGSRDFEFKPHLNSSSQSLAPAMSDLKKHEHSMQNQSMNPSSSSSNMVNENRPPCSRESSLTVNVSAQNQPVGMVGLTDSMPAEVGTSEPQQMNSSDNAMQEPQSENVADKSADDGYNWRKYGQKHVKGSENPRSYYKCTHPNCEVKKLLERAVDGLITEVVYKGRHNHPKPQPNRRLAGGAVPSNQGEERYDGASAADDKSSNALSNLANPVHSPGMVEPVPASVSDDDIDAGGGRPYPGDDATEEEDLESKRRKMESAGIDAALMGKPNREPRVVVQTVS…
HsWRKY47	WB01_007729_0614800	IIb	WRKYGQK	1710	569	59653.3	6.61	49.26	58.15	-0.577	no	nucleus	ATGGACAAGGGCCACCTCGGTGGTGGCGGAGGAGGAGGAGGGCTGCTCGCTCTGGACGCGTCGCCGCGGCAGCTTGGCTTCTTGAACTTGCTTTCGCCGGCGCCGTTCCTCAGGAACATGGAGGCGGACGACGGCGGTGGCGGCGGCAGGGGCAGGAGGTCTATCGAGGTTGACTTCTTCTCCGACGAGAAGAAGAACATGAAGAAGAGCCGGGCTTCGGCCGGTGCCGACGCGGACGACCAGAAGGATCAGGCCTCCGCCGCCGGACTCGCCATCAAGAAGGAGGACCTCACCATTAACCTCCTTTCCGGGAACAACACGAGGCGCGACCGGTCCATGGTAGTCGACGACGACGGGGCGTCCCGGGCCGATGAGGACAGTAACGGCAGGAACACCGGC…	MDKGHLGGGGGGGGLLALDASPRQLGFLNLLSPAPFLRNMEADDGGGGGRGRRSIEVDFFSDEKKNMKKSRASAGADADDQKDQASAAGLAIKKEDLTINLLSGNNTRRDRSMVVDDDGASRADEDSNGRNTGELAAMQAELSRMNDENQRLRGMLTQVNNSYHALQMHLVTLMQQRTQMPPAQPQQPPTHEEGKNESAIVPRQFLGLGPSGASAEVAEEPSNSSTEVGSPRRSSSNGNEDPERGDNPDGPSTAGWLPGRGMTQQQQLGAAAKGHDQQAQEATMRKARVSVRARSEAPIIADGCQWRKYGQKMAKGNPCPRAYYRCTMATGCPVRKQVQRCAEDRTILITTYEGTHNHPLPPAAMAMASTTSAAASMLLSGSMPSADGAGLMSSNFLAR…
HsWRKY48	WB01_003883_0050417	IIc	WKKYGQK	387	128	14031.2	7.79	54.32	34.38	-1.223	no	nucleus	ATGGCCACAGCAGGGAGCGGTCATGACGACGAGCAGGATCAGCGGCAGGCGACTTGGCCGGAGGAGGCAGACGGCGGTAGCCAGCCGCTGGTGATGCCGGAGGACGGGTACCAGTGGAAGAAGTACGGCCAGAAGTTCATCAAGAACATCCAGAAAATCAGGAGCTACTTCCGGTGCCGCGACAGGCGGTGCGGCGCCAAGAAGAAGGTGGAGTGGCAGCCGGGCGACCCCAGCCTCCGCGTCGTCTACGACGGCGCGCACCAGCACGGCTCCCCGTCGTCGTCGTCGTCGCACGGCGGCGGCGGCGGCCAGGACGGCGACGGCAACCGGTACGAGCTCAGCGCCCAGTACTTCGGCGGCGGGGCTCCCACGCCACAGGCGCGGTGA	MATAGSGHDDEQDQRQATWPEEADGGSQPLVMPEDGYQWKKYGQKFIKNIQKIRSYFRCRDRRCGAKKKVEWQPGDPSLRVVYDGAHQHGSPSSSSSHGGGGGQDGDGNRYELSAQYFGGGAPTPQAR
HsWRKY49/72	WB01_001724_0076058	III	WRKYGQK	891	296	31366	6.59	47.9	63.75	-0.456	no	nucleus	ATGCAGGCGCAGTCCCGTCTCATCATGAACCCCAACGTCGGCGTCGCCGGCCACGACGACTCCGCGGCGGCCGACGAGCAGCACAAGGCGGTGCTGAGGGAGCTGACGCACGGGCACGAGCTGACGGCGCACCTGCAGGCGGAGGCGCTGCGGGCGCTGCGCGGGCAGGGCCAGGCCGAGGCCACCGCCGCATTGATCCTGCAGGAGGTGTCCCGCGCCTTCTCCGTCTGCATCTCCATCATGGGCGGCTCCGCCCCGGCCGCGCCGCCGCCCGACGCGACCCCCGTCGTTGCCACCGGCGCCGCGAGCGCGCGCCGTCCTAGAGACGACGGCGTCCCGAGAAAGGTAACAGTGACTTCCTCGCCGTACTCCGACGGGTACCAGTGGAGGAAGTACGGC…	MQAQSRLIMNPNVGVAGHDDSAAADEQHKAVLRELTHGHELTAHLQAEALRALRGQGQAEATAALILQEVSRAFSVCISIMGGSAPAAPPPDATPVVATGAASARRPRDDGVPRKVTVTSSPYSDGYQWRKYGQKRIMRTSFPRCYYRCCYHRERSCPATKLVQQQQPHGDGDQTMYNVIYVHEHTCDHAAPAEPAARGSAPAPLGFAAGQQRGGVGLDRGSMEELERQALVSSLACVLQGRHQSYSGSGAGTPDGSPSQGRAGDVGLDVMDYDMTGTLYFAASSSYGPGGDGMIP
HsWRKY50	WB01_001384_0221650	I	WRKYGQK	1677	558	59104.2	6.24	57.02	40.2	-0.805	no	nucleus	ATGACCACCTCGTCGTCAGGGAGCGTGGAGACGTCTGCCAACTCGAGGCCGGGCTCCTTCTCCTTCGGCAGCGCGAGCTTCACGGAAATGCTGGGCGGCTCCGCCGCGGCCGGCGGCGCGTCCGGGTACAAGGCCCTGACCCCGCCTTCGCTGCCGCTCTCGCCTTCGCTCATGTCGCCGTCGTCCTTCTTCAGCATGCCCGCCGGCATGAACCTGGCCGACTTCCTCGACTCGCCGGTGCTCCTCACCTCCAGTATCTTCCCCTCACCCACGACGGGCGCGTTCGGGTCGCAGTTCAACTGGCGGCCGGAGGCGCCGGCGCCGGGCGCCGCCGAGCAGGGTGCCAACAAGGAGGAGCAGAGGCAGCCGTACTCCGACTTCTCGTTCCAGACGGCGCCT…	MTTSSSGSVETSANSRPGSFSFGSASFTEMLGGSAAAGGASGYKALTPPSLPLSPSLMSPSSFFSMPAGMNLADFLDSPVLLTSSIFPSPTTGAFGSQFNWRPEAPAPGAAEQGANKEEQRQPYSDFSFQTAPANSDEAARATTTSFQQPPVPVASQGEEAYTGQQPQQQAWGYGQQAAGANPASFSAPALPATSSEAAPAGVYRQTHSQRRSSDDGYNWRKYGQKQVKGSENPRSYYKCTFPNCPTKKKVETSLEGQITEIVYKGTHNHAKPLNTRRGSGGGAAAAQVLQSGGDASENSFGAMVTTPENSSASFGDDENAVSSPRAGGDNDDDEPDSKRRKDGGDGEGINMAGNRTVREPRVVVQTMSDIDILDDGYRWRKYGQKVVKGNPNPRSYYK…
HsWRKY51	WB01_006162_0026483	IIc	WRKYGQK	1095	364	38770.3	8.16	50.04	55.6	-0.658	no	nucleus	ATGTCGGGCGAGTTCCAGTTCCAGGACGAGCTCGCGTCGCTCTTCACGCACCGGCCTGGGCCGGGGATGCAGCAGCAGCAGCAGCAGGAGCAGCAGGCGTCCTGGCTCGCCGACTACCTGCAGACGCCCATGGACTACGACCTGCTGTGCAGGGCGCTGGAGCTGCCGGCCGAGGAGGACGTCGTCAAGAGGGAGCTGGTGGTGGACACCACGCCCAGCGCCCTCACTCCCAGCGCCGGCGGGGGGACGCCCAACGCCACGTCGTCCATGTCGTCCTCCTCCAGCGAGGCGGGAGGAGGCCTCTGCGCCGGAGAGGGGGACTCGGCGGGGAGGTGCAAGAAGGAGGACGGCGACGGGGAGGAAGGCAAGGGGGGCGATGAGGGTGACAAGACCAAGAAA…	MSGEFQFQDELASLFTHRPGPGMQQQQQQEQQASWLADYLQTPMDYDLLCRALELPAEEDVVKRELVVDTTPSALTPSAGGGTPNATSSMSSSSSEAGGGLCAGEGDSAGRCKKEDGDGEEGKGGDEGDKTKKGSAAAAKGGKACKGEKRPRQPRVAFMTKSEVDHLEDGYRWRKYGQKAVKNSPYPRSYYRCTTQKCVVKKRVERSFQDTAVVITTYEGKHTHPIPSAIRGSTHLLAAQAAHLHHQHHAHLAMMPQMGMGGRAGSPFGRSSDVLGGLLQPRGHHGMTPPIIGAGAGHQTSIQGLAGSISATATATAPSPPSLQMQHFMAPDFGLLQDMLPSFIHGAGSNNNNNQPSSPYGKLH
HsWRKY53	WB01_003516_0324846	III	WRKYGQK	771	256	27674.8	7.15	54.08	56.13	-0.527	no	nucleus	ATGAGGGGGAGCAGCATGCTCAGCTCCATTGGGAGCAACAAAAGGATGCTGCAGCAGGACTGCAGTGGCGGCAGCCATGCCCAGGAGCACACCAAGAAGAAGGCACGTGTCGGCATGAGAACAGACTACACATATGCACCGTATCATGATGGCTTCCAGTGGAGGAAATATGGGCAGAAGGTGATCCGGGGCAATGCCTTCCCAAGGTGCTACTACAGGTGCACGTACCACCAAGATCATGGCTGTTCGGCGAGCAAGCACGTGGAGCAGCACAACTCAGCGGACCCGCCGCTGTTCCGCGTGGTGTACACGAACGATCACACATGCAGCGGCGCTGCTGCTGCGGCATCGGACTACATGGCCTCATCCATGCACATCCAGCAGATCGCCGACGCTTCT…	MRGSSMLSSIGSNKRMLQQDCSGGSHAQEHTKKKARVGMRTDYTYAPYHDGFQWRKYGQKVIRGNAFPRCYYRCTYHQDHGCSASKHVEQHNSADPPLFRVVYTNDHTCSGAAAAASDYMASSMHIQQIADASLRKADTEPERPPRPQQPRSGGGCAAAIKEEKDVIVSSLLAVIRGSCDVAKSDAAHQGYSSASSLASANCYAMSPSVAGGSREGSSSSSVSPAVLPAPDDMGLGLDFMVESHWFEPLDLGWFVE
HsWRKY54	WB01_006634_0029827	IIe	WRKYGQK	1467	488	51195.9	5.83	48.93	50.12	-0.485	no	nucleus	ATGTGCGACTACTACTTGCAGAGGGTGGAGGGCGACCAGCAGGCCGGAGACCTCACCGACATCGTCCGAGCCGGTGGGGCCATGCCGGCTGGCTCTGCCGATCCCCCGTCCACGGCCACCGAGTGGCTGCAGCTCCCGACTGACCCGATCCTCTTCCCGCCGCCCCAGTCGTCCTCAGACGGCGCCGGGCCGAGCGGGGCCGACGCCGACGCCTTCGGTGACCCGTTCTCCGGCCTCCCCGACCCCTTCGGCACGGACTACCCTTCCTCTTCCGGAAGTGCCGCCGCCGACTTCTTCGATGCCGTCCAGAACGCGATGGATGTCGGCATGGCCAAGCAGGTTGGCTTCGTCGGCACGACCGGCTGCGGCGGCGGTGGAACAACTGCTGGTGCTGGTGGC…	MCDYYLQRVEGDQQAGDLTDIVRAGGAMPAGSADPPSTATEWLQLPTDPILFPPPQSSSDGAGPSGADADAFGDPFSGLPDPFGTDYPSSSGSAAADFFDAVQNAMDVGMAKQVGFVGTTGCGGGGTTAGAGGGFLDMRNHHMFPREMPMCGLSPRAMGPYALMGGGAAKLGVPMAGHGQTAGPCAFDSVAGLQMSSSPRGGGIKRRKNQARKVVCIPAPAAAVAGKTTGEVVPSDLWAWRKYGQKPIKGSPYPRGYYRCSSSKGCPARKQVERSRTDPNMLVITYTSEHNHPWPTQRNVLAGSTRSHYAKNSSNTAAASSKNSKNSSRTQHKPVVKAESKDLSATTQAVTSTTTTATTSTGNNTSPMPVKEEAEMERRIGGETPATVGYYSDHLLQQM…
HsWRKY55/87	WB01_005405_0015080	III	WRKYGQK	789	262	28090.3	5.39	35.24	71.64	-0.453	no	nucleus	ATGGAGGACACGGCGGCGACGCTGGCGGCGGAGCTGGACCGGCTGCTTGCCATGGCGAGGGACCTGGAGGCGCGCGTCGACGGCGACCAGGGCGCGCCGGGCGACGCCAGGCAGCTCTGCGCGGCGCTGGCCGAGTCCGTGGACAGGGCCATCCGCCTCGCCGGGCGCAGCCCGCCCGGCGGCGAGGGCGAGGGCGAGGGCAATGCCACCGGCAGGTCGAGCGTGACCGGGCAGGTCAGGGGCGGCAGGAAGTCGGCGGCGGACAAGGTGCGGACGCAGGTGCGGGTAGCGTCGGTGACGGACGTGGGGCCGCTCAAGGACGGGCTCAGCTGGCGCAAGTACGGCCAGAAGGACATCCTGGGGGCCACGTACCCCAGGGCATACTTCCGGTGCACGCAC…	MEDTAATLAAELDRLLAMARDLEARVDGDQGAPGDARQLCAALAESVDRAIRLAGRSPPGGEGEGEGNATGRSSVTGQVRGGRKSAADKVRTQVRVASVTDVGPLKDGLSWRKYGQKDILGATYPRAYFRCTHRHTQGCRATKQVQRAHADPLLFDVLYLGAHTCAQAAAVLASLEHQPPAAFGLEQQQQQSSSPEGIQWPVESLTPPSFPSSPAGCYTPGNPWCQLAGSHGYADMAYEYDPQFDELLLNLSEVFQPEVQNL
HsWRKY56	WB01_001694_0010977	IIc	WRKYGQK	918	305	31799.1	6.41	49.64	48.79	-0.594	no	nucleus	ATGTCCGGATCAGCAGCGGGAGGACAAGGCCCCGGCGTCGTTGGCCTGTTCTACGGCGGCCATCCGCCTGCCGCCGACGGCGACGACGACGTCTTCTTCCAGAGTCATTCAGCGTCCGGCGGCGGTGGCGACGATGGTGGTGTCACCCCGTCGGCCTACTCCAGCATCACCGACTACCTACAGGGGCTTCTCGACCCCGCGGAGCTCGCCAGGCAGCTCGACGCGCCAGCGCCACCGTGCTTCCCGACGGCGGCCGAAGTGATGGGCGCCGAAGCGGCCCCTTTCACGCCCAACTCGTCGACGTCCGGCGAGGCGGCGGGGTGCAAGAGAGGCAGCCCGGCGCCGGAGGAGGGAGACGAGGAGGGATCGGCCGGTCATGGCAGCTGCAGGAGCGACGAG…	MSGSAAGGQGPGVVGLFYGGHPPAADGDDDVFFQSHSASGGGGDDGGVTPSAYSSITDYLQGLLDPAELARQLDAPAPPCFPTAAEVMGAEAAPFTPNSSTSGEAAGCKRGSPAPEEGDEEGSAGHGSCRSDEKEQKKKVKGEKKARGSRVAFATKSEVDHLDDGYRWRKYGQKAVKNSSFPRSYYRCTAARCGVKKLVERSQQDPSTVVTTYEGRHGHPSPVAAHRGARMLMATGADTAYSLAALQHQQHGFFPAGADVYGRMCVPPTTAAAPAVPHRSSEYGGMVSYADLLPDAAMGYQQGHR
HsWRKY57	WB01_001768_0450943	I	WRKYGQK	1167	388	42606.5	7	50.32	57.11	-0.924	no	nucleus	CGCCTCCTATCTTCACCAAGGTGCAGCTCCTGATGGTGGGAATTTTGAAATGTCCCATCAGCAAGCGTTAGCCCAAGTAACAGCACAAGCATTCCATTCTCAGTATACTGTAGACAGTCAAGCAGATTACTCACTCCCTTTCTCATCGGAAGCAACATCAGCTTTGACATCACAGTTTATCAACTCTTCTGCAAATGTGACATCAATGAAGGAGACAGCAACTCCGCCATTGCGTACAGTTCATGATTACCTTAAAACATATGAGGTTTCACAAGGATTCCAAACTTCGGCCCTCACCGTGGATAAACCTGTTGATGATGGCTACAATTGGCGAAAGTATGGCCAGAAGGCAGTCAAGGGTGGAGAGTATCCAAGGAGCTACTATAAATGCACCCAGGC…	ASYLHQGAAPDGGNFEMSHQQALAQVTAQAFHSQYTVDSQADYSLPFSSEATSALTSQFINSSANVTSMKETATPPLRTVHDYLKTYEVSQGFQTSALTVDKPVDDGYNWRKYGQKAVKGGEYPRSYYKCTQASCPVKKRVEHSAYGQITQIIYRGQHNHQRPPKRRSKDGGNLLNEDDFPENRDALTRSERGSQDHSGKVEVSNDGIAGPSMSKRRDGGDQSSGSSDREEEDNDEAGDDNGDAGIVNANKRQVPAPAQRIIVQTTSEIDLLDDGYRWRKYGQKVVKGNPHPRSYYKCTYQGCDVKKHIERCSQDPTSVITTYEGKHSHDVPVARSSVAAAASANASSSISLLHRGQKAASSSQRVLPRAALHTSDSSLQLKEENEIT
HsWRKY58	WB01_010248_0041783	IId	WRKYGQK	1023	340	37379.2	9.78	53.93	59.09	-0.717	no	nucleus	ATGGAGGAAGTGGAGGAGGCCAACAGGATGGCCGTGGAGAGCTGCCACAGAGTGCTCGGCTTGCTCACCCAGACCCAGGGCCCGGAGCAGCTCCGGAGCATAGTTCTCGGGACGGACGAAGCCTGCGCCAAGTTCAGGAAGGTGGTCTCCCTCCTCGGCAACGAGCCCTCCGAAGGAACCACCCATCCTAGAGCCAAGGTTGTCAGCAGGAGGCAGACCCCCGGGTTCCTCAGCCAGAAGGGCTTCTTGGACAACAACACCCCGGTGGTGGTGTTGAACAGCGCACACCCTTCCACCAGCTCTGCGCAGGTGTATCCTAGAAACAGCATTTTGGATTCGCAGCCCGCGCACCCAATCGGAGGGCCTCCCAAGCTGGTCCAGCCATTGTCCGCGCATTTC…	MEEVEEANRMAVESCHRVLGLLTQTQGPEQLRSIVLGTDEACAKFRKVVSLLGNEPSEGTTHPRAKVVSRRQTPGFLSQKGFLDNNTPVVVLNSAHPSTSSAQVYPRNSILDSQPAHPIGGPPKLVQPLSAHFQFGDSSRYNQFQHQHQQQQQKMRAEMFKRSNSGINLKFDSPSGTGTMSSARSFMSSLSMDGSVASLDAKSSSFHLIGGPAMSDPVNAQQAPRRRCSGRGEDGNGKCAATGRCHCSKRRKLRVKRTIKVPAISNKIADIPPDEYSWRKYGQKPIKGSPHPRGYYKCSSVRGCPARKHVERCVDDPSMLIVTYEGEHNHTRMPTQSAQA
HsWRKY59	WB01_004028_0156255	I	WRKYGQK	2223	740	78443.5	6.31	50.2	54.69	-0.719	no	nucleus	GTTCCATGCTGAGATGGACGGCCACACACACATAGCCATGGAGTGGAAGGACCAGAGCGCACGGCCAGACTGCAGCATGCTGCCGAGCTTCCTCACCGACCCGTTCCCCGCGGACCCCCTGGTGGAGGACTGCGACGGCAACAACGACGGCTCCGAGGGGGCCGGGTTCGAGAGGCACGGCTTGTCGGTGGACGTGGGCTCGTCTCAGGAGGAAGGCAAGCCGATGCCGGCGACGCCGCACTTCGGCCAGAGGTCCAGCTCCAGCAGCAGCCTCTCCGAGCGGATGCAGGCTAGAGCCGGGTTCAGCGTCGCCAAGCTCAGCATGCCTGACAGCGAGTATTCAGGAGCCCAGTCGCCTTACCTGACCATCCCGCCCGGCCTTAGCCCGGCGTCGCTGCT…	FHAEMDGHTHIAMEWKDQSARPDCSMLPSFLTDPFPADPLVEDCDGNNDGSEGAGFERHGLSVDVGSSQEEGKPMPATPHFGQRSSSSSSLSERMQARAGFSVAKLSMPDSEYSGAQSPYLTIPPGLSPASLLESPVFLSNAMGQASPTTGKLLMLGDTNNNNNGRLEPPSIEDRPGAFSFKPLDLKSSQYTAEGKKGSLHNSQHPSAPSRDVPVKTETNIQTTTRGANPLGYLNQAQFNNAQDPMKRSYHDCNNKRNRLAADSTAAGGDNNASPPDNSLPAADSEAAKVGDYPAAVATAAPAEDGYSWRKYGQKQVKHSEYPRSYYKCTHPSCQVKKKVERSHEGHVTEIIYKGTHNHPRPAAQGRRPAGGAQVHPFNDAQMDAPADNNNNGGYGNAG…
HsWRKY60	WB01_005708_0224844	IIb	WRKYGQK	1842	613	62979.5	9.3	40.57	58.3	-0.464	no	nucleus	ATGATCAAGGGAGACCAGAGGCAGCTTGGCGGCCATGATGAGAGGTTGCAAGACCAGATGAGAGATGATCATCGGGCCTCAGATGGCAATTTTTTCAAGTTCTTGCAAAACCAGTCAAGCACAAAAAAAGAGGCTCAAGAAGACAAGATTGCGTCCACAAGGGCAGAGATGGGCGAAGTGAGAAAAGAGAACGAGCGGCTGAAGACGTTGCTATCACGGATGGTGGAGGACCATCGCTCCCTTCAGAAGCAATTCGATGTTCTCCACCAGCAAGGGCGAGGCAAGAACCCCGCCATGGGCTCACCGGAGCATACATCACCCGCCGACGGCCCCGGGTTCATCTCTTTGCGCCTCGGAACGAGCGCCGGCACGAGCAGGCAGAACATGGGAGAAGAGATC…	MIKGDQRQLGGHDERLQDQMRDDHRASDGNFFKFLQNQSSTKKEAQEDKIASTRAEMGEVRKENERLKTLLSRMVEDHRSLQKQFDVLHQQGRGKNPAMGSPEHTSPADGPGFISLRLGTSAGTSRQNMGEEIKGSTNNPDGKGISLGPSSARGAVGARTDGSETKVGPDVVTLSPGGSSEEDATTETTTTSAPSKAAKIPRSTGGAEAEEEVAQQPLAKKARVSVRARCDTPTMNDGCQWRKYGQKISKGNPCPRAYYRCTVAAGCPVRKQVQRCAEDMSILITTYEGAHNHQLSASAAAMASTTSAAASMLMSGSSTSLGFPSIASSLHGLRFGLPGASSDASSNQLGGRPFFLPAATGASISATPSYPTITLDLTSQAASQQAFSLSNNNRFSSSF…
HsWRKY61	WB01_006907_0162617	I	WRKYGQK	1332	443	46906.7	6.71	58.66	55.37	-0.668	no	nucleus	ATGTCCGCGCGCCCGCCCCCACCGCCGCGCCCGCGTCTGTCCCTGCCCCCGCGCTCCACCGGGGAGTCGCTCTTCTCCGGCACCGGCGACGCCAGCCCCGGCCCGCTCACCCTCGCCTCCGCGCTCTTCCCCTCCGACGCCGACGCCGACGCCGGCGGCGGCGGCGGCAGCGGTGCCTCGTCTGGCGCGGGGGCCACCAGCTTCACCCAGCTCCTCATCGGTTCCCTCTCGCAACCGCCTCCGCATCAGCAGCAGGAGAGAGGGAGAGGCGGGGTCGCCAGGGCAGGGCCGGCGCTGTCTGTGGCACCGCCGGCCGGGGCAGCTGTTTTCACCGTGCCTCCCGGCCTCAGCCCCTCCGGCTTTTTCGACTCCCCCGGTCTAATCTTCTCGCCGGCCATG…	MSARPPPPPRPRLSLPPRSTGESLFSGTGDASPGPLTLASALFPSDADADAGGGGGSGASSGAGATSFTQLLIGSLSQPPPHQQQERGRGGVARAGPALSVAPPAGAAVFTVPPGLSPSGFFDSPGLIFSPAMGGFGMSHQQALAQVTAQASHSPLRMFDHTEQPSFSAAATSSGALQNMSSAANVAEMSEMATTISNNEHAVFQSAEASHRYQVPAPVDKPADDGYNWRKYGQKVVKGSDCPRSYYKCTHPSCPVKKKVEHAEDGQISEIIYKGKHNHQRPPNKRAKDGSSSAAEQNEQSNDTASGLSGVRRDQEAVYGMSEQLSGLSDGDDKDDGESRPNEIDDRESHCKRRNIQISSQKALTESKIIVQTTSEVDLLDDGYRWRKYGQKVVKGNPH…
HsWRKY62	WB01_005961_0058508	III	WRKYGQK	1137	378	39581.7	5.84	55.28	57.25	-0.508	no	nucleus	ATGCAGGACGTTGGCGGAGGAGGAGGAGGAGGAGGGGACGGCAATAGCATGCATCTGCTCCTGACCATCCTGGCCGACGGGGAGGCGCAGGTCAGGCGGCTCCTCGGCGAGCTGCCGCCGGCCGGCGACGAGGAGCAGCTGCTCGGGCGGGGGCCGGCGGCGGAGTGCTGCCGGGGCGTGGCCGGGCAGCTGCTGTGCACGTTCGGCAAGGCCATCGCCGTCGCCAAGGCCATCGAGGCGGCCGGCGGCGACTCCCCGCGGTCGGCCGACGAGGGCGCCGGCGCCGGGATGGCCGGCAGGGACGCGGCGCATGCGCAGGAGCGCCATGGCCATGGCGTCTGCAAGAGAAGGAAGGGCTTGCCAAGATGGACCGAAAAGTTTCGTATACCCGACGACGCA…	MQDVGGGGGGGGDGNSMHLLLTILADGEAQVRRLLGELPPAGDEEQLLGRGPAAECCRGVAGQLLCTFGKAIAVAKAIEAAGGDSPRSADEGAGAGMAGRDAAHAQERHGHGVCKRRKGLPRWTEKFRIPDDANLEYTPDDGFSWRKYGQKDILGAKFPRGYYRCTYRNAQGCAATRQVQRSDADLAVFDVTYQGAHTCLQAQRRAAVPPPPPPATHDGGGGQQQDADMQLLENFRNGLKVEITDGPPPPPPPASFYGHGHDALSLPYTAAAGYSYSVGGQQQQLQGGGCFSPATFSSPAATTAAGPGYFSVSAAHCALGTHDSPELAEVVSAATTATDPAGFDYSLYQYHDLPFPFDPTMFGHRSSSHGQHGDASRN
HsWRKY63	WB01_004075_0266712	IIc	WRKYGKK	690	229	24129.6	6.07	50.51	50.57	-0.419	no	nucleus	ATGGCGGCCTCGCTGGGACTTACCAGCCATGAAGAAGCCTGCTACTCTGCCCACCCGGCCGGCTCCTCCCTGTACAACTTCCAAGACGGCGAACCCTTCGGGGCGGCGGCCGACGGTGCCGCGGCGCTGAGCTTCCAGGAGCTCGTGGACGCCGCTCGACCCTCCGACTACGCGCCGCTTCCGGCGTTCGGCGCCGCTGGAGGCGAGGCGATGAGCATGTACGAGCGGAGCGTCGTCTTCCCTATGACGACGTCCTCGTACTACTGCGACGGCGCCGGGATGTTCGACGACGACGCGGCGGCGAGGGCGAGAGGGGGAGGGGTCGGTGCTATGGCAGGGCGGCCGTCGGGGAGGATCGGGTTCCGGACCCGGTCGGAGGTGGAGGTGATGGACGACGGG…	MAASLGLTSHEEACYSAHPAGSSLYNFQDGEPFGAAADGAAALSFQELVDAARPSDYAPLPAFGAAGGEAMSMYERSVVFPMTTSSYYCDGAGMFDDDAAARARGGGVGAMAGRPSGRIGFRTRSEVEVMDDGFRWRKYGKKAVKSSPNLRNYYRCSADGCGVKKRVERDRDDPRYVLTTYDGVHNHVAPGGGTPSRAAPAYSAPAAPAWTWSELHAAAAAAAHSSESY
HsWRKY64	WB01_003597_0029329	IIe	WRKYGQK	936	311	34006.2	6.42	60.19	63.05	-0.687	no	nucleus	ATGGAGCACCTCAACGACTGGGACCTGCAGGCCGTCGTCAGGAGCTGCACCACCTTCTCCTCCCACCCCCAGGACCGCGCGGGTCCTTCTCCGTCTCCGGCGCCGGTGCCGGAGACGACGGTCAAGCGGGAACCACGCGGCGACGTGCTCCGGCCTGCATCCGCGGCCAAGGACGCGCCGTCGCTCTACGGCCTCGAGTACCTGGACTTGGATCACAAGCCCTTCTTGCTGTCGGCACCGTCGCCGCAGTCGTGGGCGGCAGTGGATGACCGCCATGAGATGATGATCTCTTTCCCCGCGGCCGCGTCCACGTCCGGCGTGCGCCCGCGGGTGCCGCCTGGCCGGAAGCCCGGCATACGAACCACCACCCCGCGCCCGAAAAGAAGCAAGAAGAGCCAG…	MEHLNDWDLQAVVRSCTTFSSHPQDRAGPSPSPAPVPETTVKREPRGDVLRPASAAKDAPSLYGLEYLDLDHKPFLLSAPSPQSWAAVDDRHEMMISFPAAASTSGVRPRVPPGRKPGIRTTTPRPKRSKKSQLKKEVREVPVADGGVSSDLWAWRKYGQKPIKGSPYPRGYYKCSSMKGCMARKLVERSPAKPGVLVITYMAEHCHPVPTQINALAGTTRHKSTPAEDHVTTTTTSPKRHGNAHEPVRCEDESNETSSMAVDGTTEDAAVDDGSDFWPTELDLDELLAPVDGDLDHVFDEDGALGRRLSL
HsWRKY65	WB01_004006_0262805	I	WRKYGQK	1089	362	39685.1	6.67	66	56.13	-0.783	no	nucleus	ATGGCCGATCGGCGTGGCGACGCCATGCGCCAGCAGCCGCCTTACTCGTCCGGCCACCAGGAGCGGGTCTTCGACGGCGGCGGCCCGGAGTTCGGGAACGATTACGATCCTGGATCATCCTACATGTCGCTTCTTGGCTCCGGCGTCAACCCCCAGCAGTTGCTGCCGGCGCCGCCGGCGTGGGGGGTCGAGGAGGTGGCCCCGCCGACCATTAATCTCACGCCTCAGTTCTCCATGGCAAACTACGTGCCGACGTCTTCATACCAGCAGCACCAGACGGCCGCATCCTTCGTGGCACCCCTCACCGCCAACCTCCACCCCTACCCCTCATCGTCGTCGTCGTCCTACTTCCAGGCCGACCTGCCGCCGCAATGGCCTCCGCGGGCAATGGCGCCGTCG…	MADRRGDAMRQQPPYSSGHQERVFDGGGPEFGNDYDPGSSYMSLLGSGVNPQQLLPAPPAWGVEEVAPPTINLTPQFSMANYVPTSSYQQHQTAASFVAPLTANLHPYPSSSSSSYFQADLPPQWPPRAMAPSPSSSLLPRNFTVHQTPAYPHHHEQQMHMQLLRAAALGGPHAPPAPPIEQPAKDGYNWRKYGQKQLKDAESPRSYYKCTRDACPVKKIVERSFDGCIKEITYKGRHTHPRPPEPRRSGAGADDVAAPSSAAGAQEDELSDDEDDGEEGHDIASWSWSSGLQSMELNGRVAGTFVLISGAGGPAGQRVVKKHKIILQTTSEVDLLDDGYRWRKYGQKVVKGNPRPRYYSIN
HsWRKY66	WB01_007134_0169798	IIb	WRKYGQK	1692	563	59242	5.15	49.96	57.46	-0.726	no	nucleus	ATGTCATCATCCAAGAGGAAGAGGGCGGACATAGATCTCGAGAGGAGGGACGACGACGGCGACGACGGCAGCGGCGATCACCGGCCCGTAGAGGCCGCGCAGGCACCGCCGCGGCTGCAGAAGGAGGGACAAATCAAGGAAGGAGAGGCACAAGCCAAAGAGGTTGTTGAAGTGGTTGTGGACCGAGGAGGAGACGCCTCCAAGGAGGAGATCAAGTATGGTACACAACAAGAAGGGTTGATGGAGGAGGACAAGCAATCTGCTGCCGCAGCAGCTGGGAGCGATGGAGGCGGAGGCGTCGACGATGAGGAGAACGACGGTCCGGGGACTCGCGCAGAAGACAAGCACATGGTAGAGGCGGCCCCTGGCGACGGCAACGGCGACGGCGACCATGACCAT…	MSSSKRKRADIDLERRDDDGDDGSGDHRPVEAAQAPPRLQKEGQIKEGEAQAKEVVEVVVDRGGDASKEEIKYGTQQEGLMEEDKQSAAAAAGSDGGGGVDDEENDGPGTRAEDKHMVEAAPGDGNGDGDHDHTAMAQDELSTMQEEMEKMKEENKMLRRVVDRTVRDYYELQTKLAAYQKQPADQEPKETEVFLSLGGTAPAVAEAKSKEEQAARRPSVGSDDTDDGREGLGLSLSLRTSSYEDETRRDVVDGGAPDIVSDVGKARGYALLESSRMSPPASGDVAAAGGIAGQQGVNAANRKTRVSVRVRCQGPTMNDGCQWRKYGQKVAKGNPCPRAYYRCTVAPACPVRKQVQRCQEDMSILITTYEGTHNHPLPVGATAMASTATAGTGAATFML…
HsWRKY67	WB01_003489_0442254	IIa	WRKYGQK	864	287	31256.3	8.47	44.02	78.29	-0.47	no	nucleus	ATGGACGACGGCTCGTCATGTCCGACCAACAGCGCCGGGCTTCTGCCGCTCTCCGCCGGCTCCCCGACGCTGCAGTCGTTGCTGATCACTGCGTTCTTGAACGCGGAGCAGGCTGAGGGTCTCGAAGAGAAGCTGAGGCGAGTGCGCGAGGAGAACCGGCGGCTGGCCGGCACACTGGGCGCCATACTCGCCGATCGCCCCGACCTGCGTGCTCTCATGAGGGCGCCAGCGTCAGCCGTCGCCTGCGCTAGGGCGCCGAGCGGCTCTGCCTCCAATGCAGCGAGGGAGGAGGCCGCCGGCGTGACGGTGGAGCCGCGGCCCAAGGTCAGGACGGTCTGCGCGCGCGCGGAGCCGGCCGACACCGACGCCAACCTTAGCGTCAAGGACGGGTACCAGTGG…	MDDGSSCPTNSAGLLPLSAGSPTLQSLLITAFLNAEQAEGLEEKLRRVREENRRLAGTLGAILADRPDLRALMRAPASAVACARAPSGSASNAAREEAAGVTVEPRPKVRTVCARAEPADTDANLSVKDGYQWRKYGQKVTRDNPHPRSYFRCAFAPSCPVRKKVQRDAEDTSKLVATYEGEHNHARSPEREFVCNESIAIGHAGSRPCSVSINPSGRTIRLEDMTNHGSGSRLDLETIRKEVVTPEFQKLLVEKMVNSLKNDADFMHALTNAVAERILEIIPARLS
HsWRKY68	WB01_001496_0299929	IIc	WRKYGQK	582	193	21217.9	9.04	41.12	47.51	-0.681	no	nucleus	ATGCCGTTGGTGCTCCAAGAACAGCCCGGGAACCACGGCGTGATGTTCTCTTCGGACCATGGCGGTGGCCTGTACCCGCTGCTTCCGGGGATCCCCTTTTGCCACTCCGCCGCCTCCCTCGAGAAGCCCACCGGGTTCGCGCCCTTGGGCGGCACCGGCGAGGCGGGCACATCGGCGGCCAGAGCGGGCAACGAGATTGCTGCTACTACTACCACTACCACCACAGCCAGCTGCCATGGCCCGAGCTCATGGTGGAAGGGGGCGGAGAAGGGGAAGATGAAGGTGAGGAGGAAGATGAGGGAGCCGCGGTTCTGCTTCCAGACCAGGAGCGAAGTGGACGTGCTGGACGACGGATACAAGTGGAGGAAGTACGGCCAGAAGGTTGTCAAGAACAGCCTT…	MPLVLQEQPGNHGVMFSSDHGGGLYPLLPGIPFCHSAASLEKPTGFAPLGGTGEAGTSAARAGNEIAATTTTTTTASCHGPSSWWKGAEKGKMKVRRKMREPRFCFQTRSEVDVLDDGYKWRKYGQKVVKNSLHPRSYYRCTHSNCRVKKRVERLSEDCRMVITTYEGRHTHTPCSDDDAGGDHTGSCTFTSF
HsWRKY69	WB01_006372_0054503	IIc	WRKYGQK	1230	409	43240	6.74	47.48	50.81	-0.671	no	nucleus	ATGTCGGGCGCGAGCCATGACCAGCACTGGCGCCACCACTCGGGGGACTTCCAGTTCCACGACGAGCTGGCCTCGCTGCTCGCGCAGCGGCCGGCCGACGCCGCCGCCTCGGCGTCGCCCATGATGCAGATGCAGCAGCCGCAGACGCCGTGGCTCTTCGCCGACTACCTGCAGGCGCCTGGGATGGACTACGACGACGCCTTCGCCAGGGACTTCATCGGCTCGCCGGCCGGCGGCGGCGTCGAGGAGGAGGTGAAGAGGGAGATGCTGGCGGTGGACGGTGCCGCTTCTGGCGTCGCGGGGATGCCTGGCGGCGGGCCGGGCGGGACGGCGCACAGCGTGTCGGTGTCGTCCACGTCCAGCGAGGCCGGGCTCGGCGGCGGCGGCGCCGTGGAGGAC…	MSGASHDQHWRHHSGDFQFHDELASLLAQRPADAAASASPMMQMQQPQTPWLFADYLQAPGMDYDDAFARDFIGSPAGGGVEEEVKREMLAVDGAASGVAGMPGGGPGGTAHSVSVSSTSSEAGLGGGGAVEDEAGKCKKEDGDGDGDDESKEAAAVGGGDGDADKTKKGAAKGKGAAKVKGEKRPRQARFAFMTKSEVDHLEDGYRWRKYGQKAVKNSPFPRSYYRCTTQKCPVKKRVERSYQDAAVVITTYEGKHIHPIPATLRGANHLLAAHAHAHGGQGLIHPSMFRMPAPPGAAFRPGDALGSFLQQQHAAMQHQQQVAAAGMAMRQANAMAGGHMQAPPADHRGLAGGTTGNNTHAISSSSSATDPLRMEHLMAQDYGLLQDMLMPPSSFAHS…
HsWRKY70	WB01_001724_0018010	III	WRKYGQK	825	274	29234.7	6.25	50.75	71.75	-0.362	no	nucleus	ATGGCGCTCGGCACCCCGACCGCCGTGGTGCTGGAGCTGATGACGATGGGGCAGCAGTCCGCGGCGCACCTCGGGGAGCTGCTCCGGGCGGCGTCCCCGCCGGTGCAAGCAGAGCACCAAGCGCTGGCCGCGGAGATCATCCGCTGCTGCGACAGGGTGATCGCCGCGGTGACCGCGGTCGCCGCCGATAAAAAGAGGAAGGCTATGGACCCCGGCGCTACATCCCGCCGTCCAGGTCCCGCGGCCGCGATGCCGTCCAAAAGAAGGGTGCGTGGCGCGGAGGCGCACAGGGAGGTCCATGCCGGCACGACGGCGGACGGGTTCGCGTGGAGGAAGTACGGGCAAAAGGACATCAACGGAAGCAACCACCCGAGGCTCTACTACCGCTGCTCGTCCAGT…	MALGTPTAVVLELMTMGQQSAAHLGELLRAASPPVQAEHQALAAEIIRCCDRVIAAVTAVAADKKRKAMDPGATSRRPGPAAAMPSKRRVRGAEAHREVHAGTTADGFAWRKYGQKDINGSNHPRLYYRCSSSGEGCAATRRVQRSQEDPAAFIIAYYGEHTCGAGLGDACQQQRAAPAPPTVVDTGSIARGIVGADDWNRNSPLLLPLSAEHSAHAAPGDTSRRWLSPSSSSSYSSEVEVELGASPVEEFLDGNFDWEWETVVNSLRFGDLLQ
HsWRKY71	WB01_002059_0364921	III	WRKYGQK	1026	341	35789.8	8.8	58.41	55.89	-0.413	no	nucleus	ATGGCGTCTTCCGGCGGCGGGCGCTCACCGGCGACGGCGGTCTTAGACGACCTGGTCGATGTTCGCGACCGAGTGGGGATGTTGCAGACCGTACTGCATGAGTCTTCGCCTCGGGCGACCGCGGAGGCGGGGGAGCTGGTGGAGGGGATGATGGCCAAGCTGTCGAGCTCCATGTCGGTTCTCGGCACCGGTGATGGCGTCATAGCGTCGTCGTCGGGAGCAGGTCGGGAATCGGGCGGGAGGAGGGAGAGAACCGGCGCGGCGGCGTCCGGGCCGCACCGCCGGAGCAGCCCGAGGAGAAGGATGAAGAGCCCTCTAATCAAGACGGTCACCACTACAATGCTCACGGATGGCAAGTCATGGAGGAAATACGGACAGAAGCAGATAAATGACTCTACT…	MASSGGGRSPATAVLDDLVDVRDRVGMLQTVLHESSPRATAEAGELVEGMMAKLSSSMSVLGTGDGVIASSSGAGRESGGRRERTGAAASGPHRRSSPRRRMKSPLIKTVTTTMLTDGKSWRKYGQKQINDSTRSYYRCTHKPDQGCQAKRHVQESESNPAEYTIDYYGQHTCRDPSTFSSLIAQGAAAAAPPPDFANLISFAPINGSNRGFTASTSTSAFAHHLMKEAADHRSMLFSRFSNPSSSPPAQEGVSSGSPSPACHGKFMQYAGGQFINVTGLSTSPLTVGSAPAEYWPVVGVAGVDMDAGAAMDSFASPPSSPGFLSGSLEGSFGNNVCHWRI
HsWRKY73	WB01_005746_0290752	IIe	WRKYGQK	1065	354	38211.8	6.06	56.03	64.29	-0.507	no	nucleus	ATGGATATGGAGGAGCAAGCCAACGCCGCCGCCACTGCTGCGCGAGAAGGCGACCTCGCCGACGTCGTGGCCCGTGCCAACGCAATGGTCTACTCCACTGGAGCCCGTCGCCAACCACCACCACCTCCTCCTTCTGCGCCAGCTCGTGTCATGATCCCCTACGAGGAGCGGCCTGCGAACGTCGCCTGCGGCGGCGGCGGCGGCGAGGTTACGCTCGAGGCGTCGCCGTCGACCGTTGTCGTCGACCCGTACCTGCTGGTTGCGGCCGGCGGATATGGACTGCTGCCGCAGCAGCAGCAGCAGCAGCACCAGCACCAGCCACTGCTGGCTTTCCAGATCTCTGAGCACGCGTGCTGCGCCGCCGCCGACAGCGACGACCCCATGAGGATCTCGCCACCA…	MDMEEQANAAATAAREGDLADVVARANAMVYSTGARRQPPPPPPSAPARVMIPYEERPANVACGGGGGEVTLEASPSTVVVDPYLLVAAGGYGLLPQQQQQQHQHQPLLAFQISEHACCAAADSDDPMRISPPPPAPHHQMIMRRNDVRKVVCIPAPPVMSNRAGGGGEVIPSDLWAWRKYGQKPIKGSPYPRGYYRCSSSKGCLARKQVERSRSDPNMLVITYTAEHNHPWPMQRNVLAGYARAHTHAAAKKQHKISSSSTTDNAASSSSSNNFHVEQNNLIAGDQLPVNCMMPNSTAYAGDDGGGLVFEGIQPDEVFAELEELEETDNCPMVIGANVYGSRGVSSNYEWHKF
HsWRKY74	WB01_002172_0236747	IIe	WRKYGQK	1023	340	36766.1	6.56	53.23	64.29	-0.576	no	nucleus	ATGTGCGACCTGTTTTGGCTGTCGCCGGGCGAGCAAGGAGACCTCTCCGATGTCGTCAGGGCAAGCCTGCACCGGCCTCATCAGCTGCCAACCCCGGCTGCCGACGAGGAGGAGGAGGAGTACAGCTCGCTGCTACGGGAAGGAGGTAGCGGTGGAGACGGCCTGGTCGTCGGCCATGGGCAGGGCGATGAGCAGCTGGGAATGGTGGCCATGATGATGGGCGGCAATACCAGGCTTCCCTCGTCTGATCATCACGTGATCTCGCTGCATTCACCGCCGGCGACGACATATACACGGCCGCATCCAGAGCCACTGGCCGGGATGATTCGTCGGCCGGGCATCGGCAGGGAAGGCGAGATGGTGGTCGCGCCGCCGCCGGAGATAGGCGAGCGCCTGCAG…	MCDLFWLSPGEQGDLSDVVRASLHRPHQLPTPAADEEEEEYSSLLREGGSGGDGLVVGHGQGDEQLGMVAMMMGGNTRLPSSDHHVISLHSPPATTYTRPHPEPLAGMIRRPGIGREGEMVVAPPPEIGERLQHMSIVHHPRVPAAMKPRKSQSKKVVCIPAPTAAPGASGRHSTSGEVVPSDLWAWRKYGQKPIKGSPYPRGYYRCSSSKGCPARKQVERSRTDPNMLVITYTSDHNHPWPTQRNALAGSTRPSSSSAARIAASSSSSSLAATAARNSSNTNVDVDCAGVHHQLKQESDLDLFADMDALNVFSSINKIQEDDSKQQLFDPFSSGFCDYI
HsWRKY75	WB01_001711_1611154	IIc	WRKYGQK	648	215	24035.3	8.84	45.94	58.88	-0.579	no	nucleus	ATGGCTTACTGTCTTCCCAACCTCAGTGTGCCGGATCACTACTACACCACCCCTGTTCCTCTTTCTCCACTTCAACTACCCTCCCATTCCAAGCCTCTCCAGATGCCATTGGACCACGAAGAAGCAGTGATGCTCTCTTCTGACCATTGTGGGCTATACCCGCTGCCAGCGCTTCCGTTCGGCCACGGCCACTCCGGCGCCGTCGTCTCCGAGAAGCCCGCGGTCGGTTTCATTCCTAATATTGGGGCTGAGGAGGTGGGCACATCGACGGTGACGGCAAGAGTTGGCTATGAGGGTGCTACTGCCTGTAATACATGGTGGAGGGCCTCGACGGCGGGGGAGAAGGGGAAGATGAAGGTGAGGAGGAAGATGAGGGAGCCGAGGTTTTGCTTCCAGACC…	MAYCLPNLSVPDHYYTTPVPLSPLQLPSHSKPLQMPLDHEEAVMLSSDHCGLYPLPALPFGHGHSGAVVSEKPAVGFIPNIGAEEVGTSTVTARVGYEGATACNTWWRASTAGEKGKMKVRRKMREPRFCFQTRSDVDVLDDGYKWRKYGQKVVKNSLHPRSYFRCTHSNCRVKKRVERLSTDCRMVITTYEGRHTHPPCDDNSSSSGDNTTTCF
HsWRKY76	WB01_011682_0043127	IIc	WRKYGQK	1146	381	39883	5.41	63.2	57.22	-0.499	no	nucleus	ATGGGGCAGGAGAGCAGCAGGTATCCATGGCAGGACTACGACCTCGGCTTCGGGGAGGAGCTCATGAGGGAGCTCCTCGACGAGACGGCGGCGGCGGCACCATCGCCAACACCAACGGCGGCCGGCGCTGGTTGCGCTGATAATTCTTCTTCTTCCAATAAGGGGATTGGTGATGATGAGGAGGAAGGTGGGGAGGGGCCGGCGGGTAGGCGCCGGGAGTCCATGGTGAACAGGCTCATGTCCACGGTCTACTCCGGGCCCACCCTCAGCGACATCGAGAGCGCCCTCTCCTTCACCGGCGCTGGCGCCGGCGACCCGCTGGACGGCCGCAGCAAGTACCACTACACCCCCTCCAGCCCAGTGGTTTTCTCGCCGGAGAAGGTGCTGGGCAAGATGGAG…	MGQESSRYPWQDYDLGFGEELMRELLDETAAAAPSPTPTAAGAGCADNSSSSNKGIGDDEEEGGEGPAGRRRESMVNRLMSTVYSGPTLSDIESALSFTGAGAGDPLDGRSKYHYTPSSPVVFSPEKVLGKMENKYTMKIKSCGNGLADDGYKWRKYGQKAIKNSPNPRSYYRCTNPRCNAKKQVERAVDEPDTLVVTYEGLHLHYTYSHFLQHQTTPPPAAAAAASSSKKPKLHPAAGAITDSHHPGSAPVTTTSPPSAAVVPAGAGDSSGDSGGNVSADAGFLLEHAVPNCSSYLFDGGLFSDAGEERRMPSDAGGLLEDMVPLMVRRPSCNSATTTASSSTAVGSPAAPVSSPSPSTSSVSWTPASPYIDMAILSNIF
HsWRKY77	WB01_007009_0088435	IId	WRKYGQK	906	301	31305.4	9.96	42.71	62.79	-0.424	no	nucleus	ATGGCCGTTGTGGGACGCGGCTACGCACCCCGTGGCCTCGCGGCCGGGGAGCAGCAGCTGGCCTTCCACGAGGCCGCCGCCGAGGGGCTCAGCAGCCTCGAGCTCCTCGTCTCGGCGCTCTCCCCGCGCGCCAACTGCGCGCCGCCGCCGCTCGGGGAGATCGCCGACCAAGCGTTGTCCGGGTTCCGCCGGGTCATCGACATCCTCGGTCGCACCGGCCACGCCCGCTTCCGCCGCGGCCCTGCTGGGGCTGCCGTCGCCGCATCGTTGACTGCCCCTCCTGTCTCTTCTCCTCCTCGGACGGCGCCCCATGCACCGGCACCGGCACCGGCACCGACAGCCTCGCAGCAGTTGGCGCCCCAGAAAAGCCTGACGCTGGACTTCACTAAGCCTTTGAAG…	MAVVGRGYAPRGLAAGEQQLAFHEAAAEGLSSLELLVSALSPRANCAPPPLGEIADQALSGFRRVIDILGRTGHARFRRGPAGAAVAASLTAPPVSSPPRTAPHAPAPAPAPTASQQLAPQKSLTLDFTKPLKAPATAAAASVTSTSFFSSVTAGGDGSVSKGRGQMVTSGKPPLAAGTKRKQQQQQTPCASGAHSDAVAAVAGDRCHCSKKRKHRVKYTTRVPAVSSRTADIPGDDYSWRKYGQKPIKGSPYPRCYYRCSTAKGCPARKHVERATDDPAMLVVTYEGEHRHDTSPPAAAN
HsWRKY78	WB01_000037_1478800	III	WRKYGQK	1401	466	49405.5	8.1	40.39	71.7	-0.353	yes	nucleus	ATGTCGCCGGCAGCGAGGCAGTGCCTGTGCGTCCTTCTTTTCTGCGGAAGCTTGGACGGTCTGGAGCTGCTCGAGCTGCTGCTCGGCGGCGGCTGGGAACAGGTGCGTGACCAGAATCTGGGATCGGGAGCGGAGGAGATCCGGCCAGAGGTGGGGAACAACTTACCAACTTATCTAGGACCAGTGCATTCCTTGAATCGAACATGCCCTTGTAATCCGATGACCAAGGGAGTATTTGTTATCCCAAACCAGATGGGCAGCGGCGAAATGGAGGTGTGCATGGAGACCCCGTTCGCGCAGGTGACGGATGATCTGATCAAGGGGCGGGAGTTGGCAACTCAGCTGCAGGGCCTCCTTCGGGACTCCCCCAAGTCCGGCCTCATAATGGACCAGATCCTC…	MSPAARQCLCVLLFCGSLDGLELLELLLGGGWEQVRDQNLGSGAEEIRPEVGNNLPTYLGPVHSLNRTCPCNPMTKGVFVIPNQMGSGEMEVCMETPFAQVTDDLIKGRELATQLQGLLRDSPKSGLIMDQILHAFSRSIHAAKAAVATSERASPDVQSEVIDGVSGGGKRKPASSAAGGNRRACRRRTQQSSVVFTKSIKSLDDGHAWRKYGQKEIHNSKHSRAYFRCTHKYDQLCAAQRQVQRCDDDEGMFRVTYIGVHTCRDPAAAVAPHVLHLTGTAEGLHAGCRLISFAPGGAAATTHDATASTTTNANLVDKDAATGSGRQGMKPESGDQEEVLSSRTPGNSAPRSTAPAATAPAWPDQGDVTSTRQYGGAVSFGEYLDDYTSLGDLASKAAG…
HsWRKY79	WB01_003459_0127731	IIc	WRKYGQK	858	285	30201.8	6.55	60.55	57.72	-0.469	no	nucleus	ATGGCCGGCGTCGCGTGCGGCGGGGGGGACTGGCCCTTCTCCGCCGAGGAAGCGTACGCCGATTCCTCTGCGCTGTTGGCGGAGATCGGCTGGGCGGCCGGTTTCGTGGACGATGGCTGCGCCGGGGAGCTGCTTCCGCCGCTGGATCTGCCTCCGGCGACGCCGGCAGGGTCCATGGAAGGGGCCGGCGCGTCGTCGAGCTCCACCGATGACGGTGCAACGCGGGAGGCTGCGGACGCCGACGGGAGGCCGGCCGCCGCGACAGAGGCAGCGAGCAAACCGGCGCCAGCGCCGCCCCCGGGGAAGGCGATGAAAAAGCAGAAGCGGGCGCGACAGCCGCGGTTCGCGTTCATGACTAAGACGGAGATCGACAACCTCGAGGACGGATACCGCTGGAGG…	MAGVACGGGDWPFSAEEAYADSSALLAEIGWAAGFVDDGCAGELLPPLDLPPATPAGSMEGAGASSSSTDDGATREAADADGRPAAATEAASKPAPAPPPGKAMKKQKRARQPRFAFMTKTEIDNLEDGYRWRKYGQKAVKNSPFPRSYYRCTNNKCTVKKRVERSSEDPSVVITTYEGQHCHHTVTFPRGAGAATLASQMAFSAHHHHLMYNDLPALHSPTAQNPLFSVSAMSSSLLQPLHCNRQELQVASYTAQTSSISSPGSVPAVDKGLLDDMVPPSMRHG
HsWRKY80	WB01_004774_0175288	III	WRKYGQK	1014	337	36476.3	6.71	65.49	55.7	-0.696	no	nucleus	ATGCAGAGGAGCAGAGGTTGTGCCCCGGGTGGTGAGCACGGCTGGGCAGCGGCGGACGGCGGCGGGATGCAGCTGCAGCGCCGGGAGAGGGAGCTGGTGGCGCAGCTGCACGAGCTGCTGTACCCGTCCACGTCGCCGTCTCGAAGCGGCGCGTCCTCGTGTTCTGGCCTTGCGGCTGAGTTGTACTGGGAGCACGGCAGCTCGCAGGTGAAGGCAACGGCGTCGTGCGGCGGAGGCAAACGGCGCGGGGGTCGCAAGAGAGCCCGGGAGGATGAACGGCACGAGGAGGGGCAAGGACAACGCGCCGGTGCTGCGACTGCGATGAAGGCTACTACTCGTTGCAGGAGGAAGAAGCTAGGCACAACGACGAGGACGCTCGTCACGACGGTGCCGGATTTC…	MQRSRGCAPGGEHGWAAADGGGMQLQRRERELVAQLHELLYPSTSPSRSGASSCSGLAAELYWEHGSSQVKATASCGGGKRRGGRKRAREDERHEEGQGQRAGAATAMKATTRCRRKKLGTTTRTLVTTVPDFDGYQWRKYGQKQIEAAMHPRSYYRCTNSTNQGCPAKRTVQRNDDDGNDNGRPKYTVVYISEHSCKSTESAAVPVILETTVRADTAAAPDVDVVPGSSSSAISSETQSPASSSDLTWSSGGSEDGANPPPRARDDYSRLFAIEDECWWWNPSPAPAVAPALLQEMDFDGPIRSPVHVAAADGSWINDLFVNEPPFVLNSCHLFAL
HsWRKY81	WB01_007847_0523607	IIe	WRKYGQK	852	283	30360.2	9.69	50.41	66.22	-0.516	no	nucleus	ATGGACTCCGGCGATTGGGGCCTCGAGGCCGTCGTGAGGAGCTGCGGCGGCTCGACCGTAGTCCCCGGCTCGGAAGCAGAGCCAGAGCCTCCAGCTGCACGGGCTCGCCGAGGAGTCGCCGCCCGTGTGGAGTTCGTCGGGCAACGAATGAAAGTGGCGGCCTCCTCGTCGTTGTACGACGTCCTGGAGGTGCCTCAGCCGCCATTTTCCATCACGCCGTCGTCGGCTTCCCATGAGCGCAGCATGTTCTTCTCCCTCCTGTCTGCCTCGACGTCCAGGCAGACGCTGCCGGGAAGGAAGCAGGCCGGCCGGAAACCGGGCGCTGGTGCTCCCACTCCTAGACGGCCGAAAAGAAGCAAGAAGAATGTGGTGCGGTTGGTGCCGGTGGCCGACGGCGGC…	MDSGDWGLEAVVRSCGGSTVVPGSEAEPEPPAARARRGVAARVEFVGQRMKVAASSSLYDVLEVPQPPFSITPSSASHERSMFFSLLSASTSRQTLPGRKQAGRKPGAGAPTPRRPKRSKKNVVRLVPVADGGVNNSTVDDLWAWRKYGQKPIKGSPHPRAYYKCSSLRACTARKLVDRSPAKPEALIVTYIDDHCHAVPVPINTPAGAAHHPPKSPRGTTASGEAGPAGREVDNADVPSSIAAELADDKSKLRARARVELDDFFGSFQFPRHRVFEDVGDHV
HsWRKY82	WB01_003105_0158851	III	WRKYGQK	777	258	27566.9	8.14	41.94	67.52	-0.391	no	nucleus	ATGGCGCTGGCCACCCCAACAGCGGTGGTGCTGGAGCTGATGACGATGGGGCAGCAGTCCGCGGCGCACCTCGGGGACCTTCTCCGGGCGGCCTCCCCGCCGGTGCGGGCGGAGCACCAGGCGCTCGCCGCGGAGATCCTCCGCTGCTGCGACCGGGTGATCGCCGCGGTGAGCGCCGGCGCCGCCGGTAAAAAGAGGAAGGCGATGGACCCAGGCAGCCATCCTCACGCTCACGCGGCCGCGATGCCGTGCAAACGAAGGGTGCGTGGCGCGGAGGCGCACAGGGAGGTCCATGCCGGCACGACGGCGGACGGGTTCGCGTGGAGGAAGTACGGGCAAAAGGACATCAACGGAAGCAACCACCCGAGGCTCTACTACCGCTGCGCGTTCAGAGGCGAG…	MALATPTAVVLELMTMGQQSAAHLGDLLRAASPPVRAEHQALAAEILRCCDRVIAAVSAGAAGKKRKAMDPGSHPHAHAAAMPCKRRVRGAEAHREVHAGTTADGFAWRKYGQKDINGSNHPRLYYRCAFRGEGCAATRRVQRAQEEPAAFVIAYYGEHTCGAAVCRQSAEPLPPSVVDSGSNARGIVGAIHQNRGSPLLPAGDQHGAQRHGQAPCDTSRGWLSPSSSSYSSEEFLDGSFDWEWETVVNSLSYGDLLQ
HsWRKY83	WB01_022855_0020607	III	WTKYGQK	876	291	31660.1	7.04	46.69	58.93	-0.613	no	nucleus	ATGGCCTCACTAGCCACTCCAGCCGCCGCTTCTACGGCGCAAACGGCGCTGGTGACCGAGATGATGGCGCGGGGACGCAAGTCCGCCGCCGCCCTCGAGGCCCTGCTACCGCTCCAGGACAACGCCGGCATCCGGGAGCTCACCGCCGAGATCCTCCGCTGCTGCGATCGCGCCCTCGCCGCGCTCCATGACACAGGCCGGAAGAAGCGCAAGTCGGCGCCCGACGGCAGCGCAGCCACTCAGACAACCAGGCCCAAACCAAGGACGCGCGCGAGCCGCGGAGAGACGGCGGCGGCGACGACGAGGGTGGAGAGGAAGCGGAACTGGGACGACGGCTTCCTGTGGACCAAGTACGGGCAGAAGGACATCCGGGGCAGCGGCCACCCGAGGCACTACTTC…	MASLATPAAASTAQTALVTEMMARGRKSAAALEALLPLQDNAGIRELTAEILRCCDRALAALHDTGRKKRKSAPDGSAATQTTRPKPRTRASRGETAAATTRVERKRNWDDGFLWTKYGQKDIRGSGHPRHYFRCAYKLDAGGCPARRQVQRSEEEEDDDPYLYVITYFGDHTCCHRGAEANATLDHVKTHYQSLVLGFGSAGGRSPRPDGDAWSAKTSRSAELAAEVAKVESTPSADLWPLGPTEGLRSSANDVRCSSSPTSAAWDASATADWDYFGNCSFDYLSEFFEL
HsWRKY84	WB01_001164_0324531	III	WRKYGEK	864	287	31485.1	6.76	58.99	62.26	-0.666	no	nucleus	ATGGCGATGCGGCCCAAGACCGAGATGTCGCCGCCGCCGGCGACCCCATCGCCCTCCGACCAGAGAGACGCTGTCATCGAGGAGCTCCGGAAGGGCTCTCAGCTGGCGGAGTTCCTCCGGCAGCAGGTGGAGCTCATCCCGGAGGACCGCTGCCGCGACGCTGCGCTAGCCAATGTGAGCAACATCTCTACGGCGCTAGCGTCGTCCCTCTCTGTGCTCCAGTCGGAGAAAGAGCAATACTGCTCCTCCTCTTCCTATGATCCTGGCCATGCTTCCGGCGCCTCAGGCGGCGGGGTGAGAAATGGCCCCGTGGCACGCTCCAGGAACAGGAAGGCGAAGCACCGGCGAGGCACCTATGGCGAGGACCTTCCAATCAAGGGGATACTAACTGAGACGCCA…	MAMRPKTEMSPPPATPSPSDQRDAVIEELRKGSQLAEFLRQQVELIPEDRCRDAALANVSNISTALASSLSVLQSEKEQYCSSSSYDPGHASGASGGGVRNGPVARSRNRKAKHRRGTYGEDLPIKGILTETPENDGFHWRKYGEKKILNAAFPRSYYRCGYSDEHECPAKKHVQQQNNSDPPMFIVTLFNDHTCSALFPANEQLPSTSNSATANSQVLDFTKASLSSAPGVSRLKKEDGAGLLVTVPSYTYDELSSYSSLPLLSPTEWKMEMEIKSFFHHHTGGGS
HsWRKY88	WB01_002982_0141170	IIb	WRKYGQK	1914	637	66248	6.35	48.14	65.73	-0.372	no	nucleus	ATGGACCAGTCGTCCTCCTCGTCCTTCGTCGCCGCTGCCGCCGGCCTCAAGCGCAAGGCCAACGCCGCCCTCGGCTGCGGCAGGGAGCTGCCGTCGGAGGCCGCCGCCGCCGTCGGGCTGGCGGGGTACGACGTCGGCGACCAGCAGGAGCGCCGGGTCGTGGTCGGCGAGATGGACTTCTTCGAGACGGAGATGAGGAAGGAGAAGCGGGACAGGAAGGACCACGCCGCCGACGACGACCTCGGCGTCATCAACAGCAACAAAGGGGCCGACCTCGGCATCGACGTGCGTGATCCGCTGATGCATCCATCAATCGTGTGGATCGACACGTATTTTCCTCATTTTGATTTTGACCTAACGTGTGTTGTTTCCCGATCCATGCGCGACGGATCGTGTTCT…	MDQSSSSSFVAAAAGLKRKANAALGCGRELPSEAAAAVGLAGYDVGDQQERRVVVGEMDFFETEMRKEKRDRKDHAADDDLGVINSNKGADLGIDVRDPLMHPSIVWIDTYFPHFDFDLTCVVSRSMRDGSCSCRSVDLQMGLHVGGRRRNSGSEESTVDDGVSSNDDDHREAKAELAAAKSELARVNEENKRLKTMLGNANTKCSSLHMQIALMQQQQQHQRSSHGHAHAHQFDPDKREQQLLLDAGSHTQLVPRQFMSLGSSSSPDEPRPARGSDASPSSNPLLAVGPDGAMDYAGCHGSVGAGKADLMPLPSFEHHGHHERGGSPEAMQGWLPSKVPKFLPAAKGPEPPPPEAAAAAATMRKARVSVRARSEAAMISDGCQWRKYGQKMAKGNPCP…
HsWRKY89	WB01_001808_0442685	IIc	WRKYGQK	1011	336	36847.9	7.89	58.58	46.13	-0.933	no	nucleus	ATGTCTTCTGGTGGTGGCGGGGGAGGGGATCAAGGCCGTCATGGCGTCTACCACCAGCATGGCCACGGCCAACTCACCCGCAACGATGGCGCCGGTGGCTACGAGTTCAGCAACGACGACATGGAGAGCTTCTTCTTCAACCAGCCTGAGGGCGTCGTCGGTGGTGTGCGCGCCGACGAGATCGAGCCGTACTCGAGCCTCACGAGCTACCTGCAGGGCTTCTTGGACCCCACCGGGCTAGCTCGGCATCTCGACGTGCCGGCCAAGCACGAGCTGTCGGTCGACGTTAGGACCCATGACCAAGACAGCCAGGGCACCGGCAGCGCTGCTGGCGAAAGCGCTCCGCTGCTAACACCCAACTCATCCGTATCTTTCTCGTCCGGAGGCGGGGACGGCGAG…	MSSGGGGGGDQGRHGVYHQHGHGQLTRNDGAGGYEFSNDDMESFFFNQPEGVVGGVRADEIEPYSSLTSYLQGFLDPTGLARHLDVPAKHELSVDVRTHDQDSQGTGSAAGESAPLLTPNSSVSFSSGGGDGEGKSHRSKKGRAQEADNQEDGESSKKANNKPKKKAEKRPRLPRVSFLTKSEVDHLEDGYRWRKYGQKAVKNSPYPRSYYRCTTPKCGVKKRVERSYQDPSTVITTYEGQHTHHSPASFRGTSAHLFMPPGVHGLPPPHLMPPGVFHPELMSMMRMPYPSPNMHLPSVPPPPHHHPMAGTPLQQHHFTDYALLQDLFPSTMPNNP
HsWRKY90	WB01_002824_0792792	I	WRKYGKK	1815	604	64919	8.33	47.99	62.05	-0.71	no	nucleus	ATGGCTGGGACCAGCAACAGGCGTGGAGCAGTAATGGAGGATTGGATGCTCTCCACACCCAGCCCAAGAACACTCATGTTGAGCCTGTTCAACGATGATTTCAGCTCGAGTCCCTTCTCCGATGTTTCCGGTGACAGTGGCAGCAACAAACCTCGTGATGGAACCGAGAGAACCAAAGCTTCCGTCGATTCGAGCCTGGGAGAAAGTTCTCGAGTTAACAAAACCTCTCTCCATTTTGAACCAAACCTGTTTGGTGCTGATGAGAAATCAAGCCCAGATAATGGCAGTCCTGCAGAAAGGAACGGTTTCTGTGCACTCAAGATCGACACTTCCCGTGTTGGTTTTTCCGCGTCGATTCGGTCTCCTATCATAATTCCACCCGGCGCACAACCTTCTCCT…	MAGTSNRRGAVMEDWMLSTPSPRTLMLSLFNDDFSSSPFSDVSGDSGSNKPRDGTERTKASVDSSLGESSRVNKTSLHFEPNLFGADEKSSPDNGSPAERNGFCALKIDTSRVGFSASIRSPIIIPPGAQPSPTTGKLPFLMRTNANTTIPSVHKKAQELSHDDHTISFQQILRSNTTFSIVDNEGPNVIHQNQPSASENNHRIPNSEQEDIKANRNGDDSPATIIVRAEDGYNWRKYGKKQVKNSGHPTNYYKCSHQNCPVKKKVEHCQDGDITEIVYKGSHNHPLPPPDRRPGVVACSRPNDLQADGAENAPADHFQDAHGEVPATNLSASLNRAGLADRSATREAIDISPPTLSGEDSKREAHGTVSSGIERDKDLAESKRRMMDYVTPATAIGTI…
HsWRKY91	WB01_006369_0366796	IIe	WRKYGQK	885	294	31670.2	6.33	47.78	61.46	-0.616	no	nucleus	ATGGACGCCGACGACTGGGGTCTCGGGGCGGTCGTGAGGAGCTGCGGCGGCACTGTCGTCTCCGGCTACGAAGCGGAGTCTCCTCGCCGAGAAGCCGTGCGTGCGCGGGATGATCCGGCCGAGTTCGTGCGGCGACCGGCGAGGGCGGCGTCCACGCCGTCGTCCCTGTACGGCGTGCTGGAGTACCTTGACCTGGAGCACGAGCAGCTGCACCAGCGGGCGCCGTTTTCTATCACGCCTTCGTCCGGGAGTGACCGTGCGCCGGATCATCACGAGGTGGTCATCTCCTTCCCTGCAGCCGCTGCCTCGACGTCTGGGCAGGCGCTGCCCGTGAAGAAGCAGGCCGGACGGAAGCCGGGAGGTGCTGGAGCCCTCCGGCGGCCGAAGAGAGGCAAGAGC…	MDADDWGLGAVVRSCGGTVVSGYEAESPRREAVRARDDPAEFVRRPARAASTPSSLYGVLEYLDLEHEQLHQRAPFSITPSSGSDRAPDHHEVVISFPAAAASTSGQALPVKKQAGRKPGGAGALRRPKRGKSKKSQMKKVVREVPVAEGGVNGPDDQWAWRKYGQKPIKGSPYPRGYYKCSSMKSCTARKLVERSTAKPGVLLVTYIADHCHAVPTTISALAGTTRNPPQSPASDDTALNRGDDSADVSSSAAGADDESELWSPVDMDDFFASFDDEFDNFFEDDALGRRVSL
HsWRKY93	WB01_004774_0724187	III	WRKYGQK	972	323	35411.7	5.61	51.66	72.79	-0.481	no	nucleus	ATGAAGCACATCAAGAAAAGCAGCAGCTCGTCCAGGCTTTTCTGCGACGACGACCGTTCAGCGGCGGCGTTGAGGGAGATGGCCAGGGAGCAGTCCCTGGTGACGCAGCTCCGGGCTGTCGTGCTGCCGGCGATCCAGCTAGCCGGCGGCGAGCGTGCCGAGGTCGTCGCCCAGATGTTCGAGAGCATACTTGACTGCTCGGCCAAGGCCATAGCCGCGCTCAAGCTTCTTCGGCTCGATCATTCTCAAGTTGATGATGAAGTGCTGCTGACGGCGATGGTGGACGACAAGACGAGAGTCAGGAAGATCGTCCCCGGTGACGGAGGAAAGGACGGCGACGACAATGCCAAGCCCCTTCGCCAAAAACCAATTAATGGGTTTAATGCTTTGGGCAGGAGA…	MKHIKKSSSSSRLFCDDDRSAAALREMAREQSLVTQLRAVVLPAIQLAGGERAEVVAQMFESILDCSAKAIAALKLLRLDHSQVDDEVLLTAMVDDKTRVRKIVPGDGGKDGDDNAKPLRQKPINGFNALGRRLGDDSVALETPVPHYDGHQWRKYGQKIINHTKHPRSYYKCTYKQEQDCKATKTVQQQQQQQDGGIEDEPVMYAVVYYGQHTCKPGQTDAAVVQTASSGRFGEGGGEELARSNSCSNISVTCSSVVVDNHQLMTASLESCCNLLDMAGDMATAEVNQYDQLFDVASFSPFDSGTAWAMDVSEHGLQKFGGW
HsWRKY94	WB01_003342_0225493	IId	WRKYGQK	861	286	30641.7	9.77	47.49	57.06	-0.566	no	nucleus	ATGGCCGTCGACCACATGGGATGCGGCTACGCCACGCATGGGCACGCGGCCGAGGAGCAGTTCCAGGAGGCCGCTGCCGCGGGGCTCCGCAGCCTCGAGCTCGTCCGCTCGTCCTTCTCCTCCCGTGCCGGCTGCGCGCCGCCGCCCCTCGGAGAGATGGCCGACCAAGCGGTGTCCAGGTTCCACCGGGTCATCAACATCCTCGACCGCACCGGCCACGCCCGCTTCCGCCGCGGCCCTGTTGGAGATGCCGCCGACTCGTTGACTCCCTCTCCTGTCTCTTCTCCTCCTCCGACGCCGGCCCAGGGACCGGCAGTCTTGCTGCAGCTGGCGCCGCAGAAAAGCATGACGCTGGACTTCACGAAGCCTTTGAAGGCGCCGGCCGCCCCTTCCGTGACG…	MAVDHMGCGYATHGHAAEEQFQEAAAAGLRSLELVRSSFSSRAGCAPPPLGEMADQAVSRFHRVINILDRTGHARFRRGPVGDAADSLTPSPVSSPPPTPAQGPAVLLQLAPQKSMTLDFTKPLKAPAAPSVTSTSFFSSVTAGGEGSVSKGWSQLVSSGKPPLPAGTKRKQRQQQTRFAHSDTAAGARCHCLKKGKHRVKYTTLEPTVTSRAVDVPGVGDKYSWRKYGQKTIKGSPHPRCYYRCGTVKGCPARKHVERATDDPAMHLVTYEGDHRHDTWPPAAAN
HsWRKY95	WB01_001983_0108847	III	WRKYGQK	906	301	32403	5.09	55.68	70.17	-0.37	no	nucleus	ATGGCGGCACTTGTCACTCCAGCAGCTTCGGTGGCGTCCGAGCTGGTGGCGCGGGGCCGGGAGTCCGCGGCCGTCCTCGAGGCCCTGCTCGACGACGCGTCGACGCAGGGGCACGGCGGGATCCGGGAGCTCGCCGCGGAGATCCTTCGCTGCTGCGACCGCGCCCTCGCCGCGCTCCACGGCGCGCCCGCCACCAGCAGGAAGCGCAAGTCGGAGCCCGACGGCGCCGCCGCCGCCCAAACGAGGCCGAGAAGAAGGATGCGCGCGAGCAGCGGACTGACGGCGGCGAGGGTCGAAAAGCGGTGGACGGCGGAGGACGGGTTCATATGGAGGAAGTACGGGCAGAAGGAGATCACGCACAGCAAGAACCCGAGGCTATACTTCAGGTGCACCTACAAG…	MAALVTPAASVASELVARGRESAAVLEALLDDASTQGHGGIRELAAEILRCCDRALAALHGAPATSRKRKSEPDGAAAAQTRPRRRMRASSGLTAARVEKRWTAEDGFIWRKYGQKEITHSKNPRLYFRCTYKHDSGCPATRQVQQSDDDHSLYIITYFGDHTCCQGDDSAVAAAEEEDIKMEPFVINFGSAATTASSTSGSPWLNSDDIDGRSEISRSPQAVCLPEGGGDELRVKVTKVETTSSDSQPAGPTAAHLSPSAEVSCASPAWDPLSICLEWDQFVESSFDFVSEFINFDGIVL
HsWRKY99	WB01_000759_0999920	III	WRKYGQK	807	268	28444.7	7.62	41.79	66.98	-0.331	no	nucleus	ATGAGGCTGAAGGGCATGCTGCAGGAGCAGTCGTCGGGTTTTGCAGAGCTGATGGACGGGATACTAAACAAGCTGTCCAGCGCTCTGTCGGCGTTGGACACCGGCTGCACGGCCGGAGCATCCGCGTCCGGGGCGTCCGATGGGGTGATCAGGGCGAGGGCGGAGAGCTCGACCGGGAGGACGAGGAAACGCAGCTTCAGCAGAAGATTAGAACGCTCATCGGGCAAGCGAGTAACTGACACGCTGGTTGATGGTCACATATGGCGGAAATATGGGCAGAAGGAAATTCAAAACTCAACTCATCCGAGGAGCTATTACAGGTGTACGCACAAATCAGACCAAGGTTGCAACGCCAAGAGGCAAGTCCAGATCTGCGAGACCCATCCAATCAAGTACGCC…	MRLKGMLQEQSSGFAELMDGILNKLSSALSALDTGCTAGASASGASDGVIRARAESSTGRTRKRSFSRRLERSSGKRVTDTLVDGHIWRKYGQKEIQNSTHPRSYYRCTHKSDQGCNAKRQVQICETHPIKYAVTYYGEHTCKAPSNTPMIIVPASGDRADNLVSFAPTLPQLLPATTQLSSSWCTSVDDVFSSSSDPFVQADELAVIVGSAGKTSSTVGSVPDYSGSGIGDMARGGTGSFASSPSSLGFVVGSLGSIVDDDFFQFDP
HsWRKY100	WB01_003516_0068204	III	WRKYGQK	801	266	29538.3	5.81	67.09	42.26	-0.923	no	nucleus	ATGGCGTCACCGCCGCACAAGAGGGAGTCGTTTGACTTCGCGGATCCACCCGCGCAGGAGGCCATGGGATCTGCCTCCGCGTCCTACAGCCCTCCCGGAGGCGTCTTCGGCCTCTCCGCGCCGGAGTCATCGCGTCGCGACAGCCGAAAGAGAAGGAAAGACAGACCTTCATGGGTCAAGAATACGTTCACACCTCATTTTGACGGTCACCTGTGGAGAAAGTACGGCCAGAAAAACATCAAGGATTCTGTCTTCCCCAGGCTTTATTACAGATGCTCTTACCGTGAAGACAAGCAATGCCTTGCCTCGAAGCTGGTGCAACAGGAGAACCACGAGGACCCACCGCTGTTCAAGGTCACCTACACGTACGAGCACACGTGCAACAGCGCTCCCGTCCCA…	MASPPHKRESFDFADPPAQEAMGSASASYSPPGGVFGLSAPESSRRDSRKRRKDRPSWVKNTFTPHFDGHLWRKYGQKNIKDSVFPRLYYRCSYREDKQCLASKLVQQENHEDPPLFKVTYTYEHTCNSAPVPTPDVVAELPAPATGDALFLRFDSTGAGHRDAHRIEQERHYQQPAAPGSGWPSMMLSFDSNSQQHEQCTFPSELPPAASSSFSTEGLPAPPSTTDGGGDGFSTWDSLRYGLNDHVHFGDHPYLPNSGNDGDDNY
HsWRKY101	WB01_003004_0455977	IIc	WRKYGQK	483	160	17796.9	9.11	34.34	50.62	-0.973	no	nucleus	ATGGTGGAGTTGGACTGGTCGTCCATGTTCCAGATGGGTCCGGTGGCTCCGCCAGAGCAGAAGGAGGAGCAGGCCGCGCAGGCGGATCGGACTCAGGGCGGGGAGAACGATGGCGAGGCGGGTGGCAGCGGAAGTGGTGGCAAAGACAGGGAGAAGGCGGAGGGAAGCGCGGGGAGATCGGGGAAGAAGAAGGTGAGCAAGCCGCGATTCGCGTTCCAGACGAGGAGCGAGAACGATATCCTGGACGACGGCTACCGCTGGAGGAAGTACGGGCAGAAGGCCGTCAAGAACAGCTCCAACCCTAGGAGCTACTACCGGTGCACCCATCCCACATGCAACGTGAAGAAGCAGGTGCAGCGCCTGGCCAAGGACACGGCCATCGTGGTGACCACGTATGAG…	MVELDWSSMFQMGPVAPPEQKEEQAAQADRTQGGENDGEAGGSGSGGKDREKAEGSAGRSGKKKVSKPRFAFQTRSENDILDDGYRWRKYGQKAVKNSSNPRSYYRCTHPTCNVKKQVQRLAKDTAIVVTTYEGVHNHPCEKLMEALGPILKQLQFLSQF
HsWRKY102	WB01_003333_0243581	IIe	WRKYGQK	1536	511	53638.6	5.98	47.22	50.49	-0.594	no	nucleus	ATGTGCGACTACTTCCTCCAGAGGATGGAGGGCGACCAGGCCGGCGGCGGGGACCTCACAGACATCGTGCGGGCCGGCGGCGCCATGCCGGGAAACAACGACGGCGACGGCAGCAACATCCCGTCAACGGCCGCCGAGTGGCAGCTGCAGCCGGCCGACCAGCCGATGCTGTTCCCGCCTCCGCCCTCCTCGTCGTCGCCGGGGACCGGCGGCGATGTCTTCGGCGACCCTTTCGCGGGGCTCGGGGACCCGTTCAGCAGCGACTATTCGTCGGGCGCCCCCGAGTTCCTGGAAGGCATGCCTGACGCCATGGCCAAAATCGGCTTCGAAGCGGGCGGCGGCGGCGGCGTCGTCACCGGCTGCGGAGGAGGCGGAGGCGGTGGCCAGATGTTCGACATG…	MCDYFLQRMEGDQAGGGDLTDIVRAGGAMPGNNDGDGSNIPSTAAEWQLQPADQPMLFPPPPSSSSPGTGGDVFGDPFAGLGDPFSSDYSSGAPEFLEGMPDAMAKIGFEAGGGGGVVTGCGGGGGGGQMFDMGRKPLLPRGMQMMPAGIGGGMGPRLMQSSLSPIAIRPYPAMTPGDMVKLGITAGQAAGCAIDAAVAGMQMSSPRNNNGGIKRRKNQARKVVCIPAPTTAGSRPTGEVVPSDLWAWRKYGQKPIKGSPHPRGYYRCSSSKGCSARKQVERSRTDPNMLVITYTSEHNHPWPTQRNALAGSTRSHHGKNGGGGGSGSGSKSSHNEKQPQNQNVKEERKDHRAASATTTATMTTSTVTTTTSTSPVVVKEETLAGSSSEAQARDHRAID…
HsWRKY104	WB01_000179_0122478	III	WRKYGQK	723	240	26863	5.9	57.14	79.25	-0.546	no	nucleus	ATGACCAGCAACAGCATGACGGTCGTCCATGGTGGCTCGGAGATGGACGCGTTGCTTAGGCGGCAGCAGGAGCTCGTGGTTCAGCTCCGAGCGCTCATCCTTCCCGCACTTCGCGACGCCGACAGCAGGTCAGCCGACCTCGCCGTCGACCTCTTCGATGGTGTGATCGGCTGCATCACCGGGGTCATATCCAAGCTCCAGAGTATCACTACCGCAGGCTGTGAACCAGCGGCCATCCTCGGCGACGTTATCTCCAACGGCGCCGGCGACTCCAACAGGGACAAGAGGAGAAGCCCGAGGAACAACGAAAAGCGGTCAAGATCACTTGTAACAATTGTTCCACATTACGATGGCCATCATTGGAGAAAATATGGGCAGAAGAACATCAACGGGAGGCAA…	MTSNSMTVVHGGSEMDALLRRQQELVVQLRALILPALRDADSRSADLAVDLFDGVIGCITGVISKLQSITTAGCEPAAILGDVISNGAGDSNRDKRRSPRNNEKRSRSLVTIVPHYDGHHWRKYGQKNINGRQHARTYYRCAYTERNCSATKTIQQQDHNGTLNCEDETAKYIVVYYGHHSCRDDITRNAANNDPTMDLIESGKMAGAVTDFEKFDQRDLDVSSLIEVFDNPELNWDIIF
HsWRKY105	WB01_001554_0058296	III	WRKYGQK	1059	352	36854	8.15	57.1	57.95	-0.376	no	nucleus	ATGGCGTCTTCCGGCGGCGGGCGCTCACCGGTGACGGCGGTCTTAGACGACCTGGTCGATGTACGCGACCGCGTGGCGGTGCTGCAGACCGTGTTGCACGAGTCTTCGCCTGGGCCGACGACCGTGGAGGCGGGGGAGCTGGTGGACGGGATGATGGCCAAGCTGTCGAGCGCCTTCTCGGTCGTTCTCGTAACCGGCGATGGCGGCGTGGCGTCGTCGTTGTCGGGAGCAGGCCGGGGGCCGAGCGGGAGGAGGAAGAGACCTGGCGCGGCGTCGTCCGGGCCGCACCGCCGGAGCAGCCCGAGGGGAAGGATGAAGAGCCCTCTAAGCAGGACGGTCACCGCTACGACGCTCATAGATGGCAAGTCATGGAGGAAGTATGGACAGAAACAGATACAT…	MASSGGGRSPVTAVLDDLVDVRDRVAVLQTVLHESSPGPTTVEAGELVDGMMAKLSSAFSVVLVTGDGGVASSLSGAGRGPSGRRKRPGAASSGPHRRSSPRGRMKSPLSRTVTATTLIDGKSWRKYGQKQIHDSTNPRSYYRCTHLPDQGCKAKRHVQQSESNPTEYTMDYYGQHTCRNPSTFPSLIVQSAAAAPPPDCANLISFAPINGANRGCTASTSTSAFAHHLMKEAADHHPMLFSRFSNYYSSSPPAQEGVSSGSPSPACHGKFMQYGAGGQFINVTGLRTSPLTVGSAPAEYWPVVGVAGFDMDAGAGMDSFPSPPSSPGFLSGSLEGSFGNNVCDDDLFSIDS
HsWRKY108	WB01_004774_0767027	III	WRKYGQK	801	266	29880.1	5.3	54.53	79.85	-0.654	no	nucleus	ATGGATCATAGCAAGAACTGCGGCCATGGCCTCACGGAGATCGTGGCGCTCATACAGCGGGAGCAGGAGCTCGTGACGCAGCTCCGGGCGCTCATCCTTCCACAACTCCACAACGTGGATAGCAGGTCGGCCGAGCTCGCCGTCCAGCTCTTCGACGACGTGATCGGCTGCAGCACCAGCGTCGTAACAAAGCTCTTCAGTGCTGGAAGTGGAAGTCGAGCGACCATCGAGGTCATCGACGACAAGTCCTTGGTGAGGAAGAACAGTAGTAGTACTGCTGCTGCTGATATCGATGACAAGATGGAAGAACAGGCGAGGCCTAGTTCCATCGTTGGTCGAAAGAGAAGGAGGAACGACGACAAGCAATCAAGATCACTCGTGACCAATGCTCCGCATTAT…	MDHSKNCGHGLTEIVALIQREQELVTQLRALILPQLHNVDSRSAELAVQLFDDVIGCSTSVVTKLFSAGSGSRATIEVIDDKSLVRKNSSSTAAADIDDKMEEQARPSSIVGRKRRRNDDKQSRSLVTNAPHYDGHQWRKYGQKNINGRQHARSYYRCTYTERNCSATKTVQQQDQDGGSSIYSTDDCEVRGAKYTVVYYGDHTCKDGDNISNNIIDHLPNLVDIDLPRGETERVTEEISEFEVDLDVPALLEVFNNSQLNWEIVC
HsWRKY109	WB01_008144_0033278	III	WKKYGQK	1476	491	56188.4	8.45	39.35	104.46	-0.178	no	nucleus	ATGATGCTTGACCTTATTATGCACAAGTGCAGAGAAGAAAATTTTATCACTGCAACAGATGACATCCAAGACATTATAGGTTTATCTGACAAGGTCCGCCGACTCTCCCTCTATCTAGACGGTATAATAGATGGCACAATATTGGAAACCACCCAGCTCTCACAAGTAAGAGCACTTGCCAGATTTGGTAACTCTGCATATGCACCTCCTCTCTTGAAGTTCAAGCATCTCCGAGTTTTAAGTCTTGAATTTCAGTGGGAGATACCTGACCTTACTGGAATATCTCATTTGTTCCAACTGAGGTATCTGAAAATTAAAGCAGATGGTAAAATAGTTTTACCAAGGATTCGGGGACTAGAGCAATTGGAGACTTTGGAGTTAGGAAAATACTATCTTGAA…	MMLDLIMHKCREENFITATDDIQDIIGLSDKVRRLSLYLDGIIDGTILETTQLSQVRALARFGNSAYAPPLLKFKHLRVLSLEFQWEIPDLTGISHLFQLRYLKIKADGKIVLPRIRGLEQLETLELGKYYLEVPSDVIHLHRLQHLIVPWRTNLPDGIGNMKSLCTLQEFDVGLNSVDNIRDLGDLINLRDLRICDKLSNMDAHRLDVLKCSLKKLCKLRYLHMDSNIKISYALSSLFLQRLHMLCLFPRVPTAIGELYNLFDLDLTIEVLEDDIAVLAQLQSLNGLKLQIKGKHETEEKVLICRKGFPVLKRFWLFCMRMSQLTFEAGTMPSLEKLEVRINSPYGAAPMGIEHLLGLKEILVIIRGYGANGSSTRAALSALRKAIDTRSSRPTANIM…
HsWRKY110	WB01_001378_0640589	IId	WRKYGQK	552	183	19386.3	10.75	47.24	58.69	-0.468	no	nucleus	ATGGCCGCCCCGGTCCCGCAGCCGCAGAGCCTCACGCTGGACTTCACCAAGCCGAACCTGACCATGTCGGGCGCGACTTCCGTGACGTCCACGTCCTTCTTCTCGTCGGTGACCGCCGCCGAGGGGAGCGTGTCCAAGGGCCGCAGCCTGGTGTCCGCCGGCAAGCCGCCGCTGTCCGGGCACAAGAGGAAGCCCTGCGCCGGCGCGCACTCGGAGGCCAACACCACGGGCAGCCGATGCCACTGCTCCAAGAGAAGGAAGAACCGCGTGAAGACAACGGTGAGAGTGCCGGCGGTGAGCGCGAAGATCGCCGACATCCCGCCGGACGAGTACTCGTGGAGGAAGTACGGCCAGAAGCCCATCAAGGGATCCCCTTACCCACGATGCACGGGCGGTGCT…	MAAPVPQPQSLTLDFTKPNLTMSGATSVTSTSFFSSVTAAEGSVSKGRSLVSAGKPPLSGHKRKPCAGAHSEANTTGSRCHCSKRRKNRVKTTVRVPAVSAKIADIPPDEYSWRKYGQKPIKGSPYPRCTGGASPSSRRGKALVASTLPGFSSKGRLLIPGIPSHVRRGFGFADDMLEMRMKA
HsWRKY111	WB01_004966_0383741	IId	WRKYGQK	387	128	13695.7	10.3	44.66	57.19	-0.562	no	nucleus	ATGGCCGCCCCAGTCCCGCAACCGCAGAGCCTCATGCTGGACTTCACCAAGCCGAACCTGACCATGTTGGGCGCGACGTCCGTGACGTCCACGTCCTTCTTCTCGTCGGTGACCGCCGCCGAGGGGAGCGTGTCCAAGGGCCGCAGCCTGGTGTCCGCCGGCAAGCCGCCGCTGTCCGGGCACAAGAGGAAGCCCTGCGCCGGCGCGCACTCGGAGGCCAACACCACGGGCAGCCAATGCCACTGCTCCAAGAGAAGGAAGAACCGCGTGAAGACGACGGTGAGAGTGCCGGCGGTGAGCGCGAAGATCGCCGACATCCCGCCGGACGAGTACTCGTGGAGGAAGTACGGCCAGAAGCACATCAAGGGATCCCCTTACCCACGGTAA	MAAPVPQPQSLMLDFTKPNLTMLGATSVTSTSFFSSVTAAEGSVSKGRSLVSAGKPPLSGHKRKPCAGAHSEANTTGSQCHCSKRRKNRVKTTVRVPAVSAKIADIPPDEYSWRKYGQKHIKGSPYPR
HsWRKY112	WB01_000038_1865268	IId	WRKYGRK	534	177	19287.1	10.86	55.64	56.78	-0.497	no	nucleus	ATGGCCGCCCCGGTCCCGCAGCCGCAGAGCCTCACGCTGGACTTCACCAAGCCGAACCTGACCATGTCGGGCGCGACGTCTATGACGTCTACGTCCTTCTTCTCGTCGGTGACCGCCACCAAGGGGAGCGTGTCCAAGGGCCGCAACCTGGTGTCCGCCGGCAAGCCGCCGCTGTCTGGGCACAAGAGGAACCCCTGCGCTGGCGCGCACTCGGAGGCCAACACCACGGGCAGCCGATGCCACTGCTCCAAGAGAAGGAGGAACCGCGTGAAGACGACGGTGAGAGTGCCGGCGGTGAGCGTGAAGATCGCTGACATCCCGTCGGACGAGTACTCATGGAGGAAGTACGGCCGGAAGCCCATCAAGGGATCCCCTTACCCACGATTGTATAGATATATA…	MAAPVPQPQSLTLDFTKPNLTMSGATSMTSTSFFSSVTATKGSVSKGRNLVSAGKPPLSGHKRNPCAGAHSEANTTGSRCHCSKRRRNRVKTTVRVPAVSVKIADIPSDEYSWRKYGRKPIKGSPYPRLYRYIMSRIRWVFFYMGRGWWATTDGSIPTRQPSGLVAALQEMSGSGGA
HsWRKY113	WB01_005708_0266828	IIb	WRKYGQK	294	97	11234	10.5	28.9	48.25	-0.896	no	nucleus	ATGCCGAGGATGACGTGGCTCAGGCAGCCGCTGGCTAAGAAGGCCAGGGTGTCGGTGAGGGCAAGGTGTGACACACCAACGTGGAGGAAGTACGGGCAGAAGATATCCAAGGGGAACTCGTGCCCGCGCGCCTACTACCGCTGCACTGTCGGAACGGGGTGCCCCCTCAGGAAGCAGAATAATCCCAACATATGGTGGTATCAAACAAAATCGGTGGCAAGAAGTGTGTTCTGCAAAACAAACTTGGGCAAGAATCATACATGTGTTGCTTCTGATCACCGTGATACTACTTAA	MPRMTWLRQPLAKKARVSVRARCDTPTWRKYGQKISKGNSCPRAYYRCTVGTGCPLRKQNNPNIWWYQTKSVARSVFCKTNLGKNHTCVASDHRDTT
HsWRKY114	WB01_005817_0448022	III	WRKLGQK	1185	394	43890.2	8.93	46.28	66.37	-0.576	no	nucleus	ATGGCGTTTAGGAGCACCTGCAACGATGGCTACAGCTGGCGGAAGTTAGGCCAAAAGATCATCCCTGGCTCCACACATCCAAGAAGTTACTACCGTTGCGTGTACAAGGACTGTGAAGCAAGGAGACGCGTGCATAAGTTGGACAGGGACCCAGAGCTCTGTAAGATCAAATACTTTGGGGAGCACACGTGCGTTCAGTCCCCGGCGATGACAGGGAGCCAGGTTGCATACGAGGAGGCCAGCGGAAGTACAGCCGGGGTTCAATTCAAGTCCGCGGCAACGTCCAGCAGCCAGGTTGCATACGAGGAGGCCAGCGGAAGTACAGCCGGGGTTCAGTTCAAGTCCGCGGCAACGTCCAGCAGCCAGGTTGCATACGAGGAGGCCAGCGGAATTACAGCC…	MAFRSTCNDGYSWRKLGQKIIPGSTHPRSYYRCVYKDCEARRRVHKLDRDPELCKIKYFGEHTCVQSPAMTGSQVAYEEASGSTAGVQFKSAATSSSQVAYEEASGSTAGVQFKSAATSSSQVAYEEASGITAGVQLKSAATSSSQITSEEASGITDGVQFKSAATSSSQITSEEAVQCTDGDPRLFGYTTYKESTPAANTALQHGHEQSSDSVWGESVGSVHELQHRQQREQPQWTVHTRTLNDGFIWHKYDNKLVDGKKHQRHYYKCSYQGCQAKRQVQVLDPLLIDIVHHVEEDTRFQLPATSAIRQNPPCSTKGWRKRVRLFALPVLDISINYESLYKKMIESECNFPQKFLRKVKFPAKIKGFYGSLLRKAFSLAINGGDRPPELIVLI
HsWRKY115	WB01_005817_0437805	III	WRKYGQK	4410	1469	163784	8.42	47.25	83.36	-0.332	no	nucleus	ATGGACGCGCCCTCGGAGCACCATACCCCGATGAAGGCCAGGCCGTCAATGGACGCACCATCGTCGCCGTGGATGGAAGATCGCCCGGAGTCGCACGCCGTCAGAAAGCTGTCCGGGGCGCCGGAGCAGTATCAGGCGCAGGGGCGCCGGAGAAGTACATTGGGCCTGCCACCACCGCGGCCCAAGATCATCCACGCCCATCCCAGCGAGTTCAGGGAGCTCGTGCAGCGGCTAACCGGCCGAAAGTCTGTCCCCTCCGAGGCCCAGACCCAGGACTTCCGGGTGGATGACGCCCTGCAGGGGCAGTCCTTCTTGCCGCCCGCCGCCGCTTCGATGCCCATGCCAGAAGGCATCATCTCCGAGAACGACAGATTCGAGCAAGCCGGCCTCGCGGCGGTC…	MDAPSEHHTPMKARPSMDAPSSPWMEDRPESHAVRKLSGAPEQYQAQGRRRSTLGLPPPRPKIIHAHPSEFRELVQRLTGRKSVPSEAQTQDFRVDDALQGQSFLPPAAASMPMPEGIISENDRFEQAGLAAVAGDYRRSILPPLPSSLPPAAASWQFSPPTPKSAEQLRDDVQSQTKKRIQKLHTEAPVCALVDAMFRLPSKLDRLLVSYGHMLPRGAEDEIPLIKQDLDKMVAILQEHDDSGAEGPSLMVKCLTKEVRELSYDMEDSVDQYVHAADSRRGILSPRRKEYKITRRRSKATSGLRGKLKWRLWMANKIREFSVRSQEALQRYSLFNHLGDNGISAAAAPIGGTGSSTSPTRNAFFGSWYPTPYGELVGIDGHVNKLQEWLGKDGEQKLK…
HsWRKY116	WB01_012048_0129340	I	WRKYGQK	1485	494	52279.2	8.59	57.98	58.74	-0.433	no	nucleus	ATGACATCTTGTGGCGGCGCTGGCGCTGGCGATGACGGTGGGCGCTCACCCCCGGCGGCAGTCTACGACGACCTGGTGGAGGTGCGCGAGCACGCGGCGACGCTGCACAGCATGCTGCAGGGGTCGCCGAGCGTGTCGGCCGTGGACGCGAGGGAGCTGATGAAGGGGATGATGGCCAAGCTGTCCAGCGCTATGTCGGTGCTGGCCACCACCAGCGGCGGCATGGAAGCGTCTACCGGGGCAGGTCGGACTCCAGGTGGGAGGAGGAAGAGATCGGGCACGGCGTCCGGGCCGCACCGCCGGAGCACCTCCAGGAGAAGGTCGAAGAGCCCTTTCATCAACATGGTCACTGCTAGGACGCTCAACGATGGCAAGACATGGAGGAAGTACGGCCAAAAA…	MTSCGGAGAGDDGGRSPPAAVYDDLVEVREHAATLHSMLQGSPSVSAVDARELMKGMMAKLSSAMSVLATTSGGMEASTGAGRTPGGRRKRSGTASGPHRRSTSRRRSKSPFINMVTARTLNDGKTWRKYGQKYIHASTNPRSYYRCSHKPDQGCQATRQVQESDSNPSEYLISYYGQHTCKDPSTFRSLIIQGAADAAPPEDLPNLISFMSINGAAAASTSSSPNHLLLAAGAGGCVQQLAVAVLXVMHGRSKSPFINMVTARTLNDGKTWRKYGQKYIHASTNPRSYYRCSHKPDQGCQATRQVQESDSNPSEYLISYYGQHTCKDPSTFRSLIIQGAADAAPPEDLPNLISFMSINGAAAASTSSSPNHLVRDAADLHSMLFSRFSNYSSSPPVQE…
NA, number of amino acids; MW, molecular weight; pI, isoelectric point; Ai, Aliphatic index; GRAVY, grand average of hydropathicity; II, instability index (<40, stable; >40, unstable); SP, signal peptide. The red font represents the mutated amino acids in variants of WRKY domain.
