# Supplementary material for: Genome-Wide Characterization of WRKY Transcription Factors Revealed Gene Duplication and Diversification in Populations of Wild to Domesticated Barley
Source: Int J Mol Sci. 2021 May 19;22(10):5354. doi: 10.3390/ijms22105354 (PMC8160967; doi:10.3390/ijms22105354)
Supplement: Supplementary file 1 [file ijms-22-05354-s001.zip › Table S4-Tandemly and segmentally duplicated genes identified in HvWRKYs.XLSX]

## Sheet: Sheet1
Table S4. Tandemly and segmentally duplicated genes identified in HvWRKYs
WRKY ID	WRKY ID	Identities (Query length)	Identity	Expect	Duplication pairs
HvWRKY1/38	no
HvWRKY2	HvWRKY23	868/997 (960)	87	0	1
HvWRKY3	HvWRKY52	856/977 (996)	88	0	2
HvWRKY4	HvWRKY106	1039/1047 (1047)	99	0	3
HvWRKY4	HvWRKY105	825/1048 (1047)	79	0	3
HvWRKY4	HvWRKY71	791/1009 (1047)	78	0	3
HvWRKY5	no
HvWRKY6	no
HvWRKY7	no
HvWRKY8	no
HvWRKY9	no
HvWRKY10	no
HvWRKY11	no
HvWRKY12	no
HvWRKY13	no
HvWRKY14	no
HvWRKY15	no
HvWRKY17	no
HvWRKY18	no
HvWRKY19	HvWRKY20	567/659 (657)	86	0	4
HvWRKY20	HvWRKY19	567/659 (651)	86	0	4
HvWRKY21	no
HvWRKY22	HvWRKY28	711/885 (999)	80	0	5
HvWRKY23	HvWRKY2	868/997 (1179)	87	0	1
HvWRKY24	no
HvWRKY26	HvWRKY55/87	654/799 (765)	82	0	6
HvWRKY26	HvWRKY29	624/762 (765)	82	0	6
HvWRKY26	HvWRKY27	610/788 (765)	77	0	6
HvWRKY27	HvWRKY55/87	546/649 (762)	84	0	6
HvWRKY27	HvWRKY26	610/788 (762)	77	0	6
HvWRKY27	HvWRKY29	590/764 (762)	77	4e-176	6
HvWRKY28	HvWRKY22	711/885 (1041)	80	0	5
HvWRKY29	HvWRKY26	624/762 (744)	82	0	6
HvWRKY29	HvWRKY55/87	557/708 (744)	79	1e-176	6
HvWRKY29	HvWRKY27	590/764 (744)	77	4e-176	6
HvWRKY30	no
HvWRKY31	HvWRKY95	713/943 (930)	76	0	7
HvWRKY32	HvWRKY78	672/853 (879)	79	0	8
HvWRKY33	no
HvWRKY34	no
HvWRKY35/41	no
HvWRKY36	no
HvWRKY37	no
HvWRKY39	no
HvWRKY40	no
HvWRKY42	no
HvWRKY43	no
HvWRKY44	no
HvWRKY45	no
HvWRKY46	no
HvWRKY47	no
HvWRKY48	no
HvWRKY49/72	no
HvWRKY50	no
HvWRKY51	no
HvWRKY52	HvWRKY3	856/977 (996)	88	0	2
HvWRKY53	no
HvWRKY54	no
HvWRKY55/87	HvWRKY26	654/799 (1044)	82	0	6
HvWRKY56	no
HvWRKY57	no
HvWRKY58	no
HvWRKY59	no
HvWRKY60	no
HvWRKY61	no
HvWRKY62	no
HvWRKY63	no
HvWRKY64	no
HvWRKY65	no
HvWRKY66	no
HvWRKY67	no
HvWRKY68	no
HvWRKY69	no
HvWRKY70	HvWRKY82	687/840 (825)	82	0	9
HvWRKY71	HvWRKY105	936/1032 (1026)	91	0	3
HvWRKY71	HvWRKY106	792/1009 (1026)	78	0	3
HvWRKY71	HvWRKY4	791/1009 (1026)	78	0	3
HvWRKY73	no
HvWRKY74	no
HvWRKY75	no
HvWRKY76	no
HvWRKY77	HvWRKY94	734/896 (900)	82	0	10
HvWRKY78	HvWRKY32	672/853 (927)	79	0	8
HvWRKY79	no
HvWRKY80	no
HvWRKY81	no
HvWRKY82	HvWRKY70	687/840 (783)	82	0	9
HvWRKY83	no
HvWRKY84	HvWRKY85	694/906 (870)	77	0	11
HvWRKY85	HvWRKY84	694/906 (873)	77	0	11
HvWRKY86	no
HvWRKY88	no
HvWRKY89	no
HvWRKY90	no
HvWRKY91	no
HvWRKY92	no
HvWRKY93	no
HvWRKY94	HvWRKY77	708/865 (861)	82	0	10
HvWRKY95	HvWRKY31	713/938 (903)	76	0	7
HvWRKY96	HvWRKY98	445/462 (546)	96	0	12
HvWRKY96	HvWRKY97	439/462 (546)	95	0	12
HvWRKY97	HvWRKY98	453/462 (462)	98	0	12
HvWRKY97	HvWRKY96	439/462 (462)	95	0	12
HvWRKY98	HvWRKY97	453/462 (462)	98	0	12
HvWRKY98	HvWRKY96	445/462 (462)	96	0	12
HvWRKY99	no
HvWRKY100	no
HvWRKY101	no
HvWRKY102	no
HvWRKY103	no
HvWRKY104	no
HvWRKY105	HvWRKY106	826/1048 (1059)	79	0	3
HvWRKY105	HvWRKY71	936/1032 (1059)	91	0	3
HvWRKY105	HvWRKY4	825/1048 (1059)	79	0	3
HvWRKY106	HvWRKY4	1039/1047 (1047)	99	0	3
HvWRKY106	HvWRKY105	826/1048 (1047)	79	0	3
HvWRKY106	HvWRKY71	792/1009 (1047)	78	0	3
HvWRKY107	no
HvWRKY108	no
HvWRKY109	no
This result was defined by Blastn, and the HvWRKY genes with identity >75% are shown in the Table.
