# Supplementary material for: Genome-Wide Characterization of WRKY Transcription Factors Revealed Gene Duplication and Diversification in Populations of Wild to Domesticated Barley
Source: Int J Mol Sci. 2021 May 19;22(10):5354. doi: 10.3390/ijms22105354 (PMC8160967; doi:10.3390/ijms22105354)
Supplement: Supplementary file 1 [file ijms-22-05354-s001.zip › Table S5-Passport information of 227 barley accessions and the haplotypes of five HvWRKYs.xlsx]

## Sheet: WRKYs
Table S5. Passport information of 227 barley accessions and the haplotypes of five HvWRKYs
Number	Genotypes	Taxanomy	Row type	Latitude	Longitude	Altitude/m	HvWRKY9	HvWRKY13	HvWRKY73	HvWRKY89	HvWRKY95
1	100-HS8	Landrace	6-row	30.5	-7.5	1826	missing	Hap III	Hap I	Hap I	Hap XIV
2	93-HS1	Landrace	6-row	30.5	-7.5	1826	Hap XI	Hap III	Hap I	Hap I	Hap XIV
3	94-HS2	Landrace	6-row	30.5	-7.5	1826	Hap XI	Hap III	Hap I	Hap I	Hap XIV
4	95-HS3	Landrace	6-row	30.5	-7.5	1826	Hap XI	Hap I	Hap I	Hap I	Hap XIV
5	B1K-03-07-1	Spontaneum	2-row	32.42	34.88	27	Hap XII	Hap II	Hap II	Hap I	Hap VIII
6	BCC003	Landrace	2-row	34.6333	65.75	2703	Hap XVII	Hap II	Hap I	Hap I	Hap XIV
7	BCC103	Landrace	6-row	32.1167	36.2667	576	Hap XVII	Hap III	Hap I	Hap I	Hap XIV
8	BCC105	Landrace	2-row	31.2833	35.8333	653	Hap I	Hap II	Hap I	Hap XV	Hap XIV
9	BCC107	Landrace	2-row	33.9333	36.1	1405	Hap I	Hap II	Hap I	Hap I	Hap XIV
10	BCC108	Landrace	6-row	34.3333	35.7333	273	Hap I	Hap I	Hap I	Hap I	Hap XIV
11	BCC110	Landrace	6-row	34.4333	36.05	456	Hap I	Hap III	Hap I	Hap I	Hap XIV
12	BCC126	Landrace	6-row	31.37	-5.79	1434	Hap XI	Hap III	Hap I	Hap I	Hap XIV
13	BCC131	Landrace	6-row	32.05	-3.05	870	Hap XI	Hap I	Hap I	Hap I	Hap XIV
14	BCC1481	Landrace	2-row	61.7833	34.35	100	Hap XVII	Hap IV	Hap I	Hap I	Hap XIV
15	BCC1487	Landrace	2-row	42.975	47.5019	7	Hap XVII	Hap III	Hap I	Hap I	Hap XIV
16	BCC1488	Landrace	6-row	51	142.64	84	Hap XVII	Hap I	Hap I	Hap I	Hap XIV
17	BCC1494	Landrace	6-row	50.2981	57.1814	213	Hap I	Hap I	Hap I	Hap I	Hap XIV
18	BCC1503	Landrace	6-row	37.9417	58.3836	222	Hap I	Hap III	Hap I	Hap XIV	Hap XIV
19	BCC1589	Landrace	2-row	37.9333	12.7333	171	Hap XVII	Hap III	Hap I	Hap XIV	Hap XIV
20	BCC167	Landrace	6-row	22.6667	57.3333	393	missing	Hap III	Hap I	Hap XV	Hap XIV
21	BCC168	Landrace	6-row	23.1667	57.6667	1337	Hap I	missing	Hap I	Hap XV	Hap XIV
22	BCC169	Landrace	6-row	25.6667	57.25	0	Hap XI	Hap III	Hap I	Hap XV	Hap XIV
23	BCC182	Landrace	6-row	36.3	73.3667	2315	Hap XVII	Hap I	Hap I	Hap I	Hap XIV
24	BCC185	Landrace	6-row	24.6333	46.7167	617	Hap XVII	Hap III	Hap I	Hap I	Hap XIV
25	BCC190	Landrace	2-row	36.8333	40.0722	362	Hap I	Hap II	Hap I	Hap I	Hap XIV
26	BCC192	Landrace	2-row	36.3833	38.9597	326	Hap I	Hap II	Hap I	Hap I	Hap XIV
27	BCC195	Landrace	2-row	33.8167	36.5442	1604	Hap I	Hap II	Hap I	Hap I	Hap XIV
28	BCC197	Landrace	2-row	36.1167	36.4631	341	Hap I	Hap II	Hap I	Hap I	Hap XIV
29	BCC21	Landrace	6-row	28.3119	30.71	33	missing	Hap I	Hap I	Hap I	Hap XIV
30	BCC42	Landrace	2-row	34.2167	-1.25	1263	Hap XVII	Hap IV	Hap I	Hap XIV	Hap XIV
31	BCC51	Landrace	6-row	30.5667	34.4833	447	missing	Hap I	Hap I	Hap I	Hap XIV
32	BCC54	Landrace	6-row	30.8167	32.5167	33	Hap I	Hap III	Hap I	Hap I	Hap XIV
33	BCC761	Landrace	6-row	28.3561	83.7361	2755	Hap XVII	Hap III	Hap I	Hap XV	Hap XIV
34	FT037	Spontaneum	2-row	31.4012	34.473	51	Hap XII	missing	Hap I	Hap I	Hap X
35	FT045	Spontaneum	2-row	31.6729	35.4367	252	Hap IX	Hap II	Hap I	Hap III	Hap I
36	FT067	Spontaneum	2-row	31.5373	34.8904	514	Hap XVI	Hap VI	Hap II	Hap I	Hap VII
37	FT011	Spontaneum	2-row	31.8347	35.3048	269	missing	Hap III	Hap II	Hap I	Hap IX
38	FT144	Spontaneum	2-row	30.5718	34.6796	847	Hap II	Hap I	Hap II	Hap I	Hap XIII
39	FT147	Spontaneum	2-row	30.8454	34.7444	476	Hap I	missing	Hap IX	Hap I	missing
40	FT172	Spontaneum	2-row	33.2294	35.7307	378	missing	Hap I	Hap I	Hap I	missing
41	FT175	Spontaneum	2-row	33.2511	35.6455	385	missing	Hap II	Hap I	Hap I	missing
42	FT018	Spontaneum	2-row	32.0687	35.3994	117	Hap XIII	Hap III	Hap IV	Hap IV	Hap XII
43	FT218	Spontaneum	2-row	31.772	35.1129	660	missing	Hap VI	Hap II	Hap VI	Hap X
44	FT219	Spontaneum	2-row	33.2872	35.7635	1585	Hap X	Hap I	Hap I	Hap I	Hap I
45	FT222	Spontaneum	2-row	32.9743	35.4239	674	Hap I	Hap VI	Hap III	Hap I	Hap VII
46	FT226	Landrace	2-row	31.7792	35.2236	812	Hap XVII	Hap II	Hap I	Hap XIV	Hap XIV
47	FT229	Spontaneum	2-row	36.4	44.15	798	Hap I	Hap VI	Hap VII	Hap I	missing
48	FT232	Spontaneum	2-row	36.4167	41.65	559	Hap VII	Hap II	Hap IV	Hap I	Hap VI
49	FT248	Spontaneum	2-row	31.6759	48.5792	30	Hap I	Hap II	Hap I	Hap I	Hap VIII
50	FT252	Spontaneum	2-row	37.25	44.4833	1168	Hap VIII	Hap II	Hap I	Hap I	Hap VIII
51	FT262	Spontaneum	2-row	36.7808	37.2833	745	Hap III	Hap II	Hap II	Hap XI	Hap I
52	FT268	Spontaneum	2-row	35.1672	38.8814	472	Hap XVII	Hap I	Hap IV	Hap I	Hap XIX
53	FT270	Spontaneum	2-row	33.6542	36.8361	844	Hap V	Hap III	Hap VI	Hap I	Hap I
54	FT272	Spontaneum	2-row	32.2167	36.05	616	Hap V	missing	Hap VI	Hap I	Hap I
55	FT276	Spontaneum	2-row	32.5833	35.6667	282	Hap I	Hap II	Hap I	Hap I	Hap XV
56	FT279	Spontaneum	2-row	35.75	69	1531	missing	Hap III	Hap I	Hap I	Hap XIV
57	FT286	Spontaneum	2-row	30.0667	50.8333	819	Hap I	Hap II	Hap I	Hap I	Hap XIV
58	FT031	Spontaneum	2-row	31.6983	34.5851	31	Hap I	Hap II	Hap I	Hap I	Hap III
59	FT332	Spontaneum	2-row	33.8167	48.1833	1613	Hap XIV	Hap III	Hap I	Hap I	missing
60	FT333	Spontaneum	2-row	35.983	59.483	1451	Hap II	Hap III	Hap I	Hap I	Hap V
61	FT338	Spontaneum	2-row	33	35.4167	621	Hap XVIII	Hap I	Hap I	Hap I	Hap XIII
62	FT340	Spontaneum	2-row	31.5	34.7	137	Hap XII	Hap VI	Hap I	Hap I	Hap VII
63	FT359	Landrace	6-row	34.02	-6.83	4	missing	Hap I	Hap I	missing	Hap XIV
64	FT361	Spontaneum	2-row	36.4	28.1667	105	missing	Hap V	Hap I	Hap I	Hap I
65	FT363	Spontaneum	2-row	34.9833	34.0167	156	missing	missing	missing	missing	missing
66	FT376	Spontaneum	2-row	35.2758	62.3417	789	missing	Hap VII	Hap XII	missing	Hap VIII
67	FT380	Landrace	2-row	31.35	27.2333	30	Hap II	Hap III	Hap IV	Hap XIV	Hap VIII
68	FT388	Landrace	6-row	29.65	91.1	3666	Hap XVII	Hap I	Hap I	Hap I	Hap I
69	FT390	Landrace	6-row	29.65	91.1	3666	Hap I	Hap II	Hap I	Hap I	Hap XIV
70	FT393	Spontaneum	2-row	32.7426	35.4453	15	missing	Hap II	Hap I	Hap II	Hap I
71	FT411	Landrace	2-row	46.3136	7.85111	1013	Hap XVII	Hap IV	Hap I	Hap XIV	Hap XIV
72	FT414	Landrace	2-row	15.36	44.21	2286	missing	Hap IV	Hap I	Hap I	Hap XIV
73	FT042	Spontaneum	2-row	30.89	34.6315	335	Hap I	Hap II	Hap IX	Hap I	Hap XVII
74	FT462	Spontaneum	2-row	37.7783	39.78	1327	Hap XV	Hap I	Hap IV	missing	Hap I
75	FT469	Spontaneum	2-row	37.5525	39.7017	1032	missing	Hap II	Hap IV	Hap I	Hap I
76	FT470	Spontaneum	2-row	37.3319	40.7714	860	Hap VII	Hap II	Hap IV	Hap I	Hap VII
77	FT473	Spontaneum	2-row	37.6583	37.7867	907	Hap XV	missing	missing	missing	Hap I
78	FT507	Spontaneum	2-row	36.3833	43.4167	321	Hap I	Hap II	Hap I	Hap I	Hap VIII
79	FT512	Spontaneum	2-row	35.6056	35.8208	28	missing	Hap II	Hap I	Hap I	Hap VII
80	FT519	Landrace	6-row	31	112	86	Hap I	Hap I	Hap I	Hap I	Hap XIV
81	FT520	Landrace	2-row	42.8186	75.2808	792	Hap XVII	Hap III	Hap I	Hap I	Hap XIV
82	FT521	Landrace	6-row	42.7333	2.68333	279	Hap XI	Hap I	Hap I	Hap I	Hap XIV
83	FT523	Landrace	6-row	41.6	60.15	87	Hap XVII	Hap III	Hap IX	Hap I	Hap XIV
84	FT524	Landrace	6-row	39.5	126.4	409	Hap I	Hap III	Hap I	Hap I	Hap XIV
85	FT525	Landrace	2-row	37.0294	37.9903	339	Hap I	Hap II	Hap I	Hap XV	Hap XIV
86	FT539	Landrace	6-row	37.5717	44.2833	1875	Hap XVII	Hap II	Hap IX	Hap XV	Hap XIV
87	FT549	Landrace	2-row	31.7167	35.8	788	Hap I	Hap IV	Hap I	Hap I	Hap XIV
88	FT553	Landrace	2-row	31.7667	35.2333	222	Hap I	Hap II	Hap I	Hap I	Hap XIV
89	FT554	Landrace	6-row	37.3333	68.6667	396	Hap XVII	Hap I	Hap I	Hap XIV	Hap XIV
90	FT555	Landrace	6-row	39.1833	41.1667	1866	Hap I	Hap III	Hap I	Hap XV	Hap XIV
91	FT056	Spontaneum	2-row	32.7805	35.6603	34	Hap VII	Hap II	Hap V	Hap VII	Hap XVI
92	FT561	Landrace	6-row	29.25	80.9167	1019	Hap XVII	Hap III	Hap I	Hap XV	Hap XIV
93	FT566	Spontaneum	2-row	38.417	56.683	749	missing	Hap II	Hap I	Hap XII	Hap XI
94	FT567	Spontaneum	2-row	41.05	61.8833	138	Hap IV	Hap III	Hap I	Hap I	missing
95	FT568	Spontaneum	2-row	34.5	63.183	1342	missing	Hap III	Hap I	Hap I	Hap V
96	FT572	Spontaneum	2-row	30.667	35.633	1572	missing	Hap II	Hap IV	Hap I	Hap XVII
97	FT578	Spontaneum	2-row	40.65	43.1	1765	Hap VIII	missing	Hap I	Hap I	Hap VIII
98	FT581	Spontaneum	2-row	37.9667	41.7167	769	Hap XIII	Hap II	Hap I	Hap I	Hap VII
99	FT582	Spontaneum	2-row	37.0925	42.0989	550	Hap I	Hap VII	Hap I	Hap I	Hap V
100	FT584	Spontaneum	2-row	36.9669	40.4975	423	Hap I	Hap II	Hap III	Hap I	Hap V
101	FT589	Spontaneum	2-row	35.0289	37.0069	422	Hap VI	Hap VIII	Hap I	Hap I	Hap V
102	FT590	Spontaneum	2-row	35.0133	36.7025	387	Hap XXI	Hap II	Hap I	Hap I	Hap IV
103	FT592	Spontaneum	2-row	37.0738	41.0856	463	Hap I	Hap II	Hap I	Hap I	Hap VII
104	FT595	Spontaneum	2-row	36.3333	42.1667	402	Hap XIX	Hap II	Hap I	Hap I	Hap VII
105	FT604	Spontaneum	2-row	36.0833	43.1667	293	Hap I	Hap II	Hap III	Hap I	Hap V
106	FT611	Spontaneum	2-row	35.5	51.25	1027	missing	Hap I	Hap I	Hap I	Hap I
107	FT613	Spontaneum	2-row	32.55	49.83	1826	missing	Hap II	Hap I	Hap I	Hap VIII
108	FT616	Spontaneum	2-row	32.1892	48.2578	87	Hap VII	Hap II	Hap I	Hap I	Hap VIII
109	FT626	Spontaneum	2-row	32.1	35.7167	665	Hap XVI	Hap IX	Hap IX	Hap I	Hap VII
110	FT627	Spontaneum	2-row	32.0167	35.9	624	Hap IX	Hap II	Hap IV	Hap I	Hap VII
111	FT628	Spontaneum	2-row	32.5964	36.3789	680	missing	Hap II	Hap V	Hap V	Hap I
112	FT630	Spontaneum	2-row	33.4667	35.8667	1112	Hap I	Hap V	Hap VIII	Hap I	Hap I
113	FT631	Spontaneum	2-row	33.9333	36.1	1288	Hap XIII	Hap II	Hap I	Hap I	Hap V
114	FT632	Spontaneum	2-row	37.0778	42.0706	643	Hap I	Hap II	Hap III	Hap I	Hap V
115	FT064	Spontaneum	2-row	31.347	35.1233	676	Hap XVII	Hap III	Hap I	Hap IX	Hap I
116	FT643	Spontaneum	2-row	31.6733	35.4373	151	Hap IX	Hap III	Hap XI	Hap III	Hap XVIII
117	FT657	Spontaneum	2-row	29.6081	52.5247	1540	Hap XXII	Hap III	Hap I	Hap I	Hap VIII
118	FT658	Spontaneum	2-row	35.3667	43.2	217	Hap VII	Hap II	Hap I	Hap VIII	Hap VIII
119	FT660	Spontaneum	2-row	36.75	45.7	1487	Hap VII	Hap III	Hap I	Hap X	Hap VII
120	FT661	Spontaneum	2-row	38.5	47.2	1613	Hap XIX	Hap II	Hap X	Hap I	Hap VII
121	FT670	Spontaneum	2-row	36.9922	36.9322	788	Hap XIX	Hap II	Hap II	Hap I	Hap VII
122	FT671	Spontaneum	2-row	33.8333	35.9167	967	Hap V	Hap III	Hap I	Hap I	Hap IV
123	FT730	Spontaneum	2-row	37.3294	37.2747	825	missing	Hap II	missing	Hap I	Hap V
124	FT731	Spontaneum	2-row	37.4239	37.2814	968	Hap III	Hap II	Hap XII	Hap I	Hap V
125	FT733	Spontaneum	2-row	36.2558	36.4672	89	Hap XIX	Hap II	Hap I	Hap I	Hap VII
126	FT734	Spontaneum	2-row	37.4103	38.7786	907	Hap VII	Hap II	Hap III	Hap I	Hap I
127	FT735	Spontaneum	2-row	37.7919	39.955	1045	Hap I	Hap II	Hap I	Hap I	Hap I
128	FT741	Spontaneum	2-row	37.6814	41.4525	616	Hap VII	Hap II	Hap IV	Hap I	Hap V
129	FT746	Spontaneum	2-row	36.9786	36.7281	572	Hap I	Hap II	Hap I	Hap I	Hap I
130	FT747	Spontaneum	2-row	36.8661	36.9519	624	Hap I	Hap II	Hap I	Hap XI	Hap VII
131	FT748	Spontaneum	2-row	37.315	37.7347	593	Hap XVI	Hap II	Hap IV	Hap XI	Hap V
132	FT075	Spontaneum	2-row	31.4374	34.8881	430	Hap XII	Hap II	Hap I	Hap XIII	Hap II
133	FT754	Spontaneum	2-row	36.95	40.0006	456	Hap XV	Hap II	Hap I	Hap I	Hap VII
134	FT871	Spontaneum	2-row	40.0711	67.6932	665	Hap II	missing	Hap I	Hap I	Hap V
135	FT873	Spontaneum	2-row	38.3111	66.625	1035	Hap I	Hap II	Hap I	Hap I	Hap I
136	FT875	Spontaneum	2-row	38.0753	67.4358	732	Hap XIII	Hap I	Hap I	Hap I	missing
137	FT878	Spontaneum	2-row	34.4427	46.0192	1182	Hap VII	Hap II	Hap I	Hap I	Hap VII
138	FT879	Spontaneum	2-row	34.5258	45.9432	1116	Hap I	Hap III	Hap I	Hap I	Hap VI
139	FT880	Spontaneum	2-row	35.2718	47.0294	1479	Hap XVII	Hap II	Hap I	Hap I	Hap VII
140	FT885	Spontaneum	2-row	38.624	68.6135	1192	Hap XIII	Hap III	Hap I	Hap I	Hap I
141	FT886	Spontaneum	2-row	38.3422	69.2394	1004	missing	Hap III	Hap I	Hap I	Hap VIII
142	HOR10103	Landrace	6-row	25.9161	13.9181	460	Hap XI	Hap III	Hap I	Hap I	Hap XIV
143	HOR10130	Landrace	6-row	30.1328	9.50028	326	Hap XI	Hap III	Hap I	Hap I	Hap XIV
144	HOR10152	Landrace	6-row	26.2258	14.8831	610	Hap XI	Hap III	Hap I	Hap I	Hap XIV
145	HOR10280	Landrace	2-row	26.8031	13.5333	458	Hap I	Hap III	Hap I	Hap I	Hap XIV
146	HOR10350	Landrace	6-row	8.15	36.47	2084	Hap XVII	Hap III	Hap I	Hap XIV	Hap XIV
147	HOR10360	Landrace	6-row	43.05	42.7167	2379	Hap XVII	Hap IV	Hap I	Hap I	Hap XIV
148	HOR10410	Landrace	2-row	52.4061	21.3317	96	Hap XVII	Hap IV	Hap I	Hap XIV	Hap XIV
149	HOR10551	Landrace	6-row	37.5786	13.7522	603	Hap I	Hap III	Hap III	Hap XIV	Hap XIV
150	HOR10609	Landrace	6-row	36.1664	43.2569	229	Hap XVII	Hap III	Hap I	Hap I	Hap XIV
151	HOR10610	Landrace	2-row	36.4433	43.2567	289	Hap I	Hap II	Hap I	Hap XV	Hap XIV
152	HOR10627	Landrace	6-row	34.8333	42	332	Hap XVII	missing	Hap I	Hap I	Hap XIV
153	HOR10705	Landrace	6-row	42.1772	44.7289	825	Hap XI	Hap V	Hap I	Hap I	Hap XIV
154	HOR10761	Landrace	2-row	5.63333	38.2333	1943	Hap XVII	Hap III	Hap I	Hap I	Hap XIV
155	HOR10782	Landrace	2-row	41.9017	13.8825	1670	Hap XVII	Hap IV	Hap I	Hap I	Hap XIV
156	HOR11317	Landrace	2-row	31.7156	35.1871	825	Hap I	Hap IV	Hap I	Hap I	Hap XIV
157	HOR1133	Landrace	6-row	46.2167	2.21361	390	Hap I	Hap III	Hap I	Hap I	Hap XIV
158	HOR11403	Landrace	6-row	31.1	77.167	1502	Hap XVII	Hap I	Hap I	Hap XV	missing
159	HOR1192	Landrace	6-row	38.2928	29.0061	757	Hap XI	Hap III	Hap I	Hap XIV	Hap XIV
160	HOR12762	Landrace	2-row	38.2833	67.9	531	Hap I	Hap II	Hap I	Hap XIV	Hap XIV
161	HOR12830	Landrace	6-row	36.7014	38.0865	426	Hap XI	Hap III	Hap I	Hap XIV	Hap XIV
162	HOR13416	Landrace	6-row	31.05	-8.83333	1330	Hap XI	Hap I	Hap I	Hap I	Hap XIV
163	HOR14153	Landrace	6-row	12.0428	18.7919	514	missing	Hap III	Hap I	Hap XV	Hap XIV
164	HOR14279	Landrace	6-row	14.6983	39.4292	2243	Hap I	Hap III	Hap III	Hap XIV	Hap XIV
165	HOR1431	Landrace	2-row	34.86	71.14	825	Hap XVII	Hap III	Hap I	Hap XIV	Hap XIV
166	HOR1463	Landrace	6-row	35.91	71.31	3793	Hap XVII	Hap III	Hap I	Hap XIV	Hap XIV
167	HOR154	Landrace	2-row	31.4167	73.0833	187	Hap XVII	Hap IV	Hap XV	Hap XIV	Hap XIV
168	HOR1707	Landrace	2-row	35.91	71.52	2966	Hap XVII	Hap IV	Hap I	Hap XIV	Hap XIV
169	HOR1758	Landrace	6-row	35	71.1504	2379	Hap XVII	Hap III	Hap XIII	Hap I	Hap V
170	HOR1804	Landrace	6-row	35	71.15	2379	Hap IV	Hap III	Hap I	Hap I	Hap XIV
171	HOR1842	Landrace	6-row	36.27	72.38	2317	Hap IV	Hap III	Hap I	Hap I	Hap XIV
172	HOR203	Landrace	2-row	50.0992	36.4872	158	missing	Hap IV	Hap I	Hap I	Hap XIV
173	HOR2351	Landrace	2-row	34.765	113.65	98	Hap I	Hap I	Hap I	Hap I	Hap XIV
174	HOR2458	Landrace	6-row	29.65	91.1	3645	Hap XVII	Hap I	Hap I	Hap I	Hap XIV
175	HOR2462	Landrace	6-row	29.43	94.45	2920	Hap IV	Hap III	Hap I	Hap I	Hap XIV
176	HOR2465	Landrace	6-row	29.65	91.1	3666	Hap XVII	Hap I	Hap I	Hap I	Hap I
177	HOR2766	Landrace	6-row	24.05	23.31	425	missing	missing	Hap I	Hap I	Hap XIV
178	HOR2777	Landrace	2-row	37.6333	47.8	1556	Hap XVII	Hap III	Hap I	Hap XIV	Hap XIV
179	HOR2785	Landrace	2-row	35.6	51.8667	1851	Hap XVII	Hap IV	Hap I	Hap XIV	Hap XIV
180	HOR2792	Landrace	2-row	30.5167	50.85	1590	missing	Hap II	Hap I	Hap XV	Hap XIV
181	HOR2800	Landrace	6-row	31.5333	48.8167	24	Hap XVII	Hap III	Hap I	Hap I	Hap XIV
182	HOR2808	Landrace	2-row	33.5667	50.85	1994	Hap XVII	Hap III	Hap I	Hap XIV	Hap XIV
183	HOR2829	Landrace	2-row	34.5833	48.8167	1875	Hap XVII	Hap IV	Hap I	Hap XIV	Hap XIV
184	HOR2854	Landrace	6-row	38.65	46.7833	2122	Hap XX	Hap II	Hap IX	Hap XV	Hap XIV
185	HOR2867	Landrace	2-row	37.6333	58.9833	732	Hap XVII	Hap IV	Hap I	Hap XIV	Hap XIV
186	HOR354	Landrace	2-row	47.9833	9.11667	607	Hap XVII	Hap III	Hap I	Hap I	Hap XIV
187	HOR383	Landrace	6-row	43.8544	25.9586	44	Hap I	Hap I	Hap I	Hap I	Hap XIV
188	HOR3938	Landrace	6-row	28.21	-16.78	945	Hap I	Hap III	Hap I	Hap I	Hap XIV
189	HOR3950	Landrace	2-row	47.0064	13.1667	2275	Hap XVII	missing	Hap I	Hap I	Hap XIV
190	HOR3959	Landrace	6-row	47.2722	12.6447	768	Hap XVII	Hap I	Hap I	Hap I	Hap I
191	HOR396	Landrace	6-row	42.3144	27.7669	20	missing	Hap V	missing	Hap I	Hap XIV
192	HOR4150	Landrace	6-row	36.7	3.21667	23	missing	Hap I	Hap I	Hap I	Hap XIV
193	HOR4469	Landrace	2-row	32.685	36.0333	444	missing	Hap IV	Hap I	Hap I	Hap XIV
194	HOR454	Landrace	6-row	40.65	27.9167	0	Hap XVII	Hap V	Hap I	Hap I	Hap XIV
195	HOR4720	Landrace	2-row	56.6483	23.7139	4	Hap I	Hap I	Hap I	Hap I	Hap XIV
196	HOR4724	Landrace	2-row	40.1833	44.5167	971	Hap XVII	Hap IV	Hap I	Hap XIV	Hap XIV
197	HOR5702	Landrace	2-row	7.66667	36.8333	1733	missing	Hap IV	Hap I	Hap I	Hap XIV
198	HOR6360	Landrace	6-row	7.46667	36.8833	2178	Hap I	Hap IV	Hap I	Hap I	Hap XIV
199	HOR713	Landrace	6-row	37.6667	22.1833	1043	missing	Hap III	Hap I	Hap I	Hap XIV
200	HOR7380	Landrace	6-row	49.5197	18.8322	578	Hap I	Hap I	Hap I	Hap I	Hap XIV
201	HOR742	Landrace	6-row	43.8667	18.4167	602	missing	Hap V	Hap I	Hap I	Hap XIV
202	HOR7436	Landrace	6-row	49.3572	18.8928	665	Hap I	Hap I	Hap I	Hap I	Hap XIV
203	HOR752	Landrace	6-row	39.0742	21.8242	695	missing	Hap V	Hap I	Hap I	Hap XIV
204	HOR756	Landrace	6-row	40.7878	20.1892	245	Hap XI	Hap I	Hap I	Hap I	Hap XIV
205	HOR758	Landrace	6-row	42.0036	21.4522	250	Hap XI	Hap V	Hap I	Hap I	Hap XIV
206	HOR7969	Landrace	2-row	38	37	1401	Hap I	Hap IV	Hap I	Hap XIV	Hap XIV
207	HOR8113	Landrace	2-row	39.25	29.5	1050	Hap I	Hap IV	Hap I	Hap XIV	Hap XIV
208	HOR8455	Landrace	6-row	30.5	47.8167	3	Hap XVII	Hap III	missing	Hap I	Hap XIV
209	HOR8635	Landrace	2-row	48.5281	22.1411	103	Hap XVII	Hap IV	Hap XIV	Hap XIV	Hap XIV
210	HOR8658	Landrace	2-row	31.1933	29.9042	-8	Hap XI	Hap V	Hap I	Hap I	Hap XIV
211	HOR8826	Landrace	6-row	49.4214	20.9592	736	Hap I	Hap I	Hap I	Hap I	missing
212	HOR8827	Landrace	2-row	49.6333	20.6	281	Hap XVII	Hap IV	missing	Hap XIV	Hap XIV
213	HOR8842	Landrace	6-row	37.5733	-6.75333	265	missing	Hap III	Hap I	Hap I	Hap XIV
214	HOR902	Landrace	2-row	41.2928	36.3311	79	Hap I	Hap III	Hap I	Hap XIV	Hap XIV
215	HOR937	Landrace	2-row	39.0742	21.8242	1049	Hap XVII	Hap IV	Hap I	Hap I	Hap XIV
216	HOR9453	Landrace	2-row	46.7772	23.5997	335	Hap XVII	Hap III	Hap I	Hap XIV	Hap XIV
217	HOR9607	Landrace	2-row	42.3	43.35	625	Hap XVII	Hap III	Hap I	Hap I	Hap XIV
218	HOR9827	Landrace	6-row	32.7667	13.9833	64	Hap XI	Hap III	Hap I	Hap I	Hap XIV
219	HOR9888	Landrace	6-row	32.7636	22.6392	235	Hap XI	Hap III	Hap III	Hap I	Hap XIV
220	HOR9919	Landrace	2-row	45.4322	6.30569	370	Hap I	Hap IV	Hap I	Hap XIV	missing
221	SBCC002	Landrace	6-row	42.85	-2.67	513	Hap XI	Hap I	Hap XIV	Hap I	Hap XIV
222	SBCC003	Landrace	6-row	40.63	-3.15	643	Hap XI	missing	Hap I	Hap I	Hap XIV
223	SBCC014	Landrace	6-row	37.53	-5.07	180	Hap I	Hap V	Hap I	Hap I	Hap XIV
224	SBCC095	Landrace	6-row	40.98	-6.85	490	Hap XI	Hap III	Hap I	Hap XIV	Hap XIV
225	SBCC144	Landrace	6-row	28.8	-17.81	1403	Hap I	Hap V	Hap I	Hap I	Hap XIV
226	SBCC147	Landrace	2-row	43.07	-4.77	1449	Hap XVII	Hap IV	Hap I	Hap I	Hap XIV
227	SBCC158	Landrace	2-row	41.98	1.52	724	Hap XVII	Hap I	Hap I	Hap I	Hap XIV
