# Supplementary material for: Genome-Wide Characterization of WRKY Transcription Factors Revealed Gene Duplication and Diversification in Populations of Wild to Domesticated Barley
Source: Int J Mol Sci. 2021 May 19;22(10):5354. doi: 10.3390/ijms22105354 (PMC8160967; doi:10.3390/ijms22105354)
Supplement: Supplementary file 1 [file ijms-22-05354-s001.zip › Table S7-Information of HvWRKY9 haplotypes.XLSX]

## Sheet: Table S7
Table S7. Information of HvWRKY9 haplotypes
Haplotypes	Mutation loci on CDS	Number of accessions	Frequency of haplotypes in total accessions	Descriptions
I	Cultivated type (Morex)	60	0.315789	Morex v2.0 2019
II	G489T, C495G, G732A, A789G, T831C, C945A, G972C, C1014G	4	0.0210526	S, S, S, S, S, S, S, S
III	G489T, C495G, G732A, A789G, T831C, C945A, G972C, G993A, C1014G	2	0.0105263	S, S, S, S, S, S, S, S, S
IV	G489T, C495G, A702G, G732A, A789G, T831C, C945A, G972C, C1014G	4	0.0210526	S, S, S, S, S, S, S, S, S
V	T429C, T480G, G489T, C495G, G732A, A789G, T831C, C945A, G972C, C1014G	3	0.0157895	S, S, S, S, S, S, S, S, S, S
VI	G489T, C495G, G765A, C798T, A804G, A813G, C945A, G972C, C1014G, T1026A	1	0.00526316	S, S, Ile255Met, S, S, S, S, S, S, S
VII	G489T, C495G, 637-642 6-bp deletion, G732A, A789G, C945A, G972C, C1014G	9	0.0473684	S, S, 2 amino acids deletion, S, S, S, S, S
VIII	G106C, A450G, G489T, C495G, G732A, A789G, T831C, C945A, G972C, C1014G	2	0.0105263	Val36Leu, S, S, S, S, S, S, S, S, S
IX	A51G	3	0.0157895	S
X	G732A, A789G, G972C, C1014G	1	0.00526316	S, S, S, S
XI	289-294 6-bp Indel, C495G, C501G, G605C, T624C, C951A, G978C, C1020G	22	0.115789	2 amino acids insertion, S, S, Ser202Thr, S, S, S, S
XII	G489T, C495G, T645C, G732A, A789G, C945A, G972C, C1014G, G1177T	4	0.0210526	S, S, S, S, S, S, S, S, Ala393Ser
XIII	G489T, C495G, T645C, G732A, A789G, C945A, G972C, C1014G	5	0.0263158	S, S, S, S, S, S, S, S
XIV	G489T, C495G, 637-642 6-bp deletion, G732A, A789G, C945A, G972C, C1014G, C1023A	1	0.00526316	S, S, 2 amino acids deletion, S, S, S, S, S, S
XV	G277A, G489T, C495G, 637-642 6-bp deletion, G732A, A789G, C945A, G972C, C1014G, C1023A	3	0.0157895	Ala93Thr, S, S, 2 amino acids deletion, S, S, S, S, S, S
XVI	C495G, 637-642 6-bp deletion, G732A, A789G, C945A, G972C, C1014G, C1023A	3	0.0157895	S, 2 amino acids deletion, S, S, S, S, S, S
XVII	G489T, C495G, T645C, G732A, A789G, A924G, C945A, G972C, C1014G	55	0.289474	S, S, S, S, S, S, S, S, S
XVIII	G732A, A789G, C855T	1	0.00526316	S, S, S
XIX	G489T, C495G, T645C, G732A, A789G, A880G, C945A, G972C, C1014G	4	0.0210526	S, S, S, S, S, Ser294Gly, S, S, S
XX	C378A, G489T, C495G, T645C, G732A, A789G, A924G, C945A, G972C, C1014G	1	0.00526316	Asp126Glu, S, S, S, S, S, S, S, S, S
XXI	G363T, G489T, C495G, T645C, G732A, A789G, A880G, C945A, G972C, C1014G	1	0.00526316	S, S, S, S, S, S, Ser294Gly, S, S, S
XXII	G732A, A789G	1	0.00526316	S, S
S=Synonymous
